# Supplementary material for: Histone H2B ubiquitylation and H3 lysine 4 methylation prevent ectopic silencing of euchromatic loci important for the cellular response to heat
Source: PubMed Central journal article supplement — Mol Biol Cell. 2011 Aug 1;22(15):2741–53. doi: 10.1091/mbc.E11-05-0426 (PMC3145549; doi:10.1091/mbc.e11-05-0426), 2011-08-01
Supplement: E11-05-0426_1.pdf [file E11-05-0426_1.pdf]

**Supplemental Table S1: Genes differentially expressed more than two-fold between WT and *htbK123R* cells**

| Systematic name | Standard Name         | Log2 (Fold change) | Gene Ontology Annotation                                                                                                                                                                                                                       |
|-----------------|-----------------------|--------------------|------------------------------------------------------------------------------------------------------------------------------------------------------------------------------------------------------------------------------------------------|
| YLR410W-B       |                       | -1.79              | Retrotransposon TYA Gag and TYB Pol genes; transcribed/ translated as one unit; polyprotein is processed to make a nucleocapsid-like protein (Gag), reverse transcriptase (RT), protease (PR), and integrase (IN); similar to retroviral genes |
| YLR346C         |                       | -1.71              | Putative protein of unknown function found in mitochondria; expression is regulated by transcription factors involved in pleiotropic drug resistance, Pdr1p and Yrr1p; YLR346C is not an essential gene                                        |
| YER035W         | <i>EDC2</i>           | -1.65              | RNA-binding protein, activates mRNA decapping directly by binding to the mRNA substrate and enhancing the activity of the decapping proteins Dcp1p and Dcp2p; has a role in translation during heat stress                                     |
| YER053C-A       |                       | -1.63              | Putative protein of unknown function; green fluorescent protein (GFP)-fusion protein localizes to the endoplasmic reticulum                                                                                                                    |
| YDR406W         | <i>PDR15</i>          | -1.52              | Plasma membrane ATP binding cassette (ABC) transporter, multidrug transporter and general stress response factor implicated in cellular detoxification; regulated by Pdr1p, Pdr3p and Pdr8p; promoter contains a PDR responsive element        |
| YOR289W         |                       | -1.48              | Putative protein of unknown function; transcription induced by the unfolded protein response; green fluorescent protein (GFP)-fusion protein localizes to both the cytoplasm and the nucleus                                                   |
| YNL160W         | <i>YGP1</i>           | -1.43              | Cell wall-related secretory glycoprotein; induced by nutrient deprivation-associated growth arrest and upon entry into stationary phase; may be involved in adaptation prior to stationary phase entry; has similarity to Sps100p              |
| YLR030W         |                       | -1.42              | Putative protein of unknown function                                                                                                                                                                                                           |
| YHR094C         | <i>HXT1,HOR4</i>      | -1.41              | Low-affinity glucose transporter of the major facilitator superfamily, expression is induced by Hxk2p in the presence of glucose and repressed by Rgt1p when glucose is limiting                                                               |
| YAL061W         | <i>BDH2</i>           | -1.40              | Putative medium-chain alcohol dehydrogenase with similarity to BDH1; transcription induced by constitutively active PDR1 and PDR3                                                                                                              |
| YMR013W-A       |                       | -1.39              | Dubious open reading frame unlikely to encode a protein, based on available experimental and comparative sequence data; completely overlaps the characterized snoRNA gene snR73                                                                |
| YDR074W         | <i>TPS2,PFK3,HOG2</i> | -1.38              | Phosphatase subunit of the trehalose-6-phosphate synthase/ phosphatase complex, which synthesizes the storage carbohydrate trehalose; expression is induced by stress conditions and repressed by the Ras-cAMP pathway                         |
| YIL045W         | <i>PIG2</i>           | -1.31              | Putative type-1 protein phosphatase targeting subunit that tethers Glc7p type-1 protein phosphatase to Gsy2p glycogen synthase                                                                                                                 |

**Supplemental Table S1: Genes differentially expressed more than two-fold between WT and *htbK123R* cells**

| Systematic name | Standard Name         | Log2 (Fold change) | Gene Ontology Annotation                                                                                                                                                                                                                        |
|-----------------|-----------------------|--------------------|-------------------------------------------------------------------------------------------------------------------------------------------------------------------------------------------------------------------------------------------------|
| YDR058C         | <i>TGL2</i>           | -1.31              | Triacylglycerol lipase that is localized to the mitochondria; has lipolytic activity towards triacylglycerols and diacylglycerols when expressed in <i>E. coli</i>                                                                              |
| YML100W         | <i>TSL1</i>           | -1.28              | Large subunit of trehalose 6-phosphate synthase (Tps1p)/phosphatase (Tps2p) complex, which converts uridine-5'-diphosphoglucose and glucose 6-phosphate to trehalose, homologous to Tps3p and may share function                                |
| YJL164C         | <i>TPK1,SRA3,PKA1</i> | -1.24              | cAMP-dependent protein kinase catalytic subunit; promotes vegetative growth in response to nutrients via the Ras-cAMP signaling pathway; inhibited by regulatory subunit Bcy1p in the absence of cAMP; partially redundant with Tpk2p and Tpk3p |
| YER037W         | <i>PHM8</i>           | -1.23              | Protein of unknown function, expression is induced by low phosphate levels and by inactivation of Pho85p                                                                                                                                        |
| YOL151W         | <i>GRE2</i>           | -1.19              | 3-methylbutanal reductase and NADPH-dependent methylglyoxal reductase (D-lactaldehyde dehydrogenase); stress induced (osmotic, ionic, oxidative, heat shock and heavy metals); regulated by the HOG pathway                                     |
| YMR291W         |                       | -1.18              | Putative kinase of unknown function; green fluorescent protein (GFP)-fusion protein localizes to the cytoplasm and nucleus; YMR291W is not an essential gene                                                                                    |
| YPR107C         | <i>YTH1</i>           | -1.18              | Essential RNA-binding component of cleavage and polyadenylation factor, contains five zinc fingers; required for pre-mRNA 3'-end processing and polyadenylation                                                                                 |
| YEL020W-A       | <i>TIM9</i>           | -1.17              | Essential protein of the mitochondrial intermembrane space, forms a complex with Tim10p (TIM10 complex) that delivers hydrophobic proteins to the TIM22 complex for insertion into the inner membrane                                           |
| YLR453C         | <i>RIF2</i>           | -1.16              | Protein that binds to the Rap1p C-terminus and acts synergistically with Rif1p to help control telomere length and establish telomeric silencing; deletion results in telomere elongation                                                       |
| YGL104C         | <i>VPS73</i>          | -1.16              | Mitochondrial protein; mutation affects vacuolar protein sorting; putative transporter; member of the sugar porter family                                                                                                                       |
| YBR177C         | <i>EHT1</i>           | -1.14              | Acyl-coenzymeA:ethanol O-acyltransferase that plays a minor role in medium-chain fatty acid ethyl ester biosynthesis; possesses short-chain esterase activity; localizes to lipid particles and the mitochondrial outer membrane                |
| YHR037W         | <i>PUT2</i>           | -1.13              | Delta-1-pyrroline-5-carboxylate dehydrogenase, nuclear-encoded mitochondrial protein involved in utilization of proline as sole nitrogen source; deficiency of the human homolog causes HPII, an autosomal recessive inborn error of metabolism |

**Supplemental Table S1: Genes differentially expressed more than two-fold between WT and *htbK123R* cells**

| Systematic name | Standard Name                   | Log2 (Fold change) | Gene Ontology Annotation                                                                                                                                                                                                                       |
|-----------------|---------------------------------|--------------------|------------------------------------------------------------------------------------------------------------------------------------------------------------------------------------------------------------------------------------------------|
| YIL077C         |                                 | -1.11              | Putative protein of unknown function; the authentic, non-tagged protein is detected in highly purified mitochondria in high-throughput studies; deletion confers sensitivity to 4-(N-(S-glutathionylacetyl)amino) phenylarsenoxide (GSAO)      |
| YPR036W-A       |                                 | -1.10              | Protein of unknown function; transcription is regulated by Pdr1p                                                                                                                                                                               |
| YOR273C         | <i>TPO4</i>                     | -1.09              | Polyamine transport protein, recognizes spermine, putrescine, and spermidine; localizes to the plasma membrane; member of the major facilitator superfamily                                                                                    |
| YDL115C         | <i>IWR1</i>                     | -1.08              | Protein involved in transcription from polymerase II promoters; interacts with with most of the polymerase II subunits; nucleo-cytoplasmic shuttling protein; deletion causes hypersensitivity to the K1 killer toxin                          |
| YDR288W         | <i>NSE3</i>                     | -1.08              | Essential subunit of the Mms21-Smc5-Smc6 complex; protein of unknown function; required for DNA repair and growth                                                                                                                              |
| YOR173W         | <i>DCS2</i>                     | -1.08              | Non-essential, stress induced regulatory protein containing a HIT (histidine triad) motif; modulates m7G-oligoribonucleotide metabolism; inhibits Dcs1p; regulated by Msn2p, Msn4p, and the Ras-cAMP-cAPK signaling pathway, similar to Dcs1p. |
| YGR017W         |                                 | -1.08              | Putative protein of unknown function; green fluorescent protein (GFP)-fusion protein localizes to both the nucleus and the cytoplasm                                                                                                           |
| YDR383C         | <i>NKP1</i>                     | -1.08              | Non-essential kinetochore protein, subunit of the Ctf19 central kinetochore complex (Ctf19p-Mcm21p-Okp1p-Mcm22p-Mcm16p-Ctf3p-Chl4p-Mcm19p-Nkp1p-Nkp2p-Ame1p-Mtw1p)                                                                             |
| YDL022W         | <i>GPD1,OSR5,OSG1,HOR1,DAR1</i> | -1.05              | NAD-dependent glycerol-3-phosphate dehydrogenase, key enzyme of glycerol synthesis, essential for growth under osmotic stress; expression regulated by high-osmolarity glycerol response pathway; homolog of Gpd2p                             |
| YBR149W         | <i>ARA1</i>                     | -1.05              | NADP+ dependent arabinose dehydrogenase, involved in carbohydrate metabolism; purified as homodimer; naturally occurs with a N-terminus degradation product                                                                                    |
| YOR153W         | <i>PDR5,STS1,YDR1,LEM1</i>      | -1.05              | Plasma membrane ATP-binding cassette (ABC) transporter, multidrug transporter actively regulated by Pdr1p; also involved in steroid transport, cation resistance, and cellular detoxification during exponential growth                        |
| YJR059W         | <i>PTK2,STK2</i>                | -1.04              | Putative serine/threonine protein kinase involved in regulation of ion transport across plasma membrane; enhances spermine uptake                                                                                                              |
| YGL037C         | <i>PNC1</i>                     | -1.03              | Nicotinamidase that converts nicotinamide to nicotinic acid as part of the NAD(+) salvage pathway, required for life span extension by calorie restriction; PNC1 expression responds to all known stimuli that extend replicative life span    |

**Supplemental Table S1: Genes differentially expressed more than two-fold between WT and *htbK123R* cells**

| Systematic name | Standard Name                   | Log2 (Fold change) | Gene Ontology Annotation                                                                                                                                                                                                                         |
|-----------------|---------------------------------|--------------------|--------------------------------------------------------------------------------------------------------------------------------------------------------------------------------------------------------------------------------------------------|
| YGR194C         | <i>XKS1</i>                     | -1.02              | Xylulokinase, converts D-xylulose and ATP to xylulose 5-phosphate and ADP; rate limiting step in fermentation of xylulose; required for xylose fermentation by recombinant <i>S. cerevisiae</i> strains                                          |
| YOR036W         | <i>PEP12, VPT13, VPS6, VPL6</i> | -1.01              | Target membrane receptor (t-SNARE) for vesicular intermediates traveling between the Golgi apparatus and the vacuole; controls entry of biosynthetic, endocytic, and retrograde traffic into the prevacuolar compartment; syntaxin               |
| YNR032C-A       | <i>HUB1</i>                     | -1.01              | Ubiquitin-like protein modifier, may function in modification of Sph1p and Hbt1p, functionally complemented by the human or <i>S. pombe</i> ortholog; mechanism of Hub1p adduct formation not yet clear                                          |
| YBR093C         | <i>PHO5, phoE</i>               | 1.00               | Repressible acid phosphatase (1 of 3) that also mediates extracellular nucleotide-derived phosphate hydrolysis; secretory pathway derived cell surface glycoprotein; induced by phosphate starvation and coordinately regulated by PHO4 and PHO2 |
| YML116W-A       |                                 | 1.01               | Putative protein of unknown function                                                                                                                                                                                                             |
| YLR349W         |                                 | 1.02               | Dubious open reading frame unlikely to encode a protein, based on available experimental and comparative sequence data; overlaps the verified ORF DIC1/YLR348C                                                                                   |
| YPR143W         | <i>RRP15</i>                    | 1.04               | Nucleolar protein, constituent of pre-60S ribosomal particles; required for proper processing of the 27S pre-rRNA at the A3 and B1 sites to yield mature 5.8S and 25S rRNAs                                                                      |
| YPL250C         | <i>ICY2</i>                     | 1.04               | Protein of unknown function; mobilized into polysomes upon a shift from a fermentable to nonfermentable carbon source; potential Cdc28p substrate                                                                                                |
| YJL037W         | <i>IRC18</i>                    | 1.04               | Putative protein of unknown function; expression induced in respiratory-deficient cells and in carbon-limited chemostat cultures; similar to adjacent ORF, YJL038C; null mutant displays increased levels of spontaneous Rad52p foci             |
| YNR065C         | <i>YSN1</i>                     | 1.05               | Protein of unknown function; protein-protein interactions suggest a possible role in actin patch formation; YNR065C is not an essential gene                                                                                                     |
| YIL099W         | <i>SGA1</i>                     | 1.05               | Intracellular sporulation-specific glucoamylase involved in glycogen degradation; induced during starvation of <i>a/a</i> diploids late in sporulation, but dispensable for sporulation                                                          |
| YLR176C         | <i>RFX1, CRT1</i>               | 1.05               | Major transcriptional repressor of DNA-damage-regulated genes, recruits repressors Tup1p and Cyc8p to their promoters; involved in DNA damage and replication checkpoint pathway; similar to a family of mammalian DNA binding RFX1-4 proteins   |
| YCL027W         | <i>FUS1</i>                     | 1.06               | Membrane protein localized to the shmoo tip, required for cell fusion; expression regulated by mating pheromone; proposed to coordinate signaling, fusion, and polarization events required for fusion; potential Cdc28p substrate               |

**Supplemental Table S1: Genes differentially expressed more than two-fold between WT and *htbK123R* cells**

| Systematic name | Standard Name         | Log2 (Fold change) | Gene Ontology Annotation                                                                                                                                                                                                                              |
|-----------------|-----------------------|--------------------|-------------------------------------------------------------------------------------------------------------------------------------------------------------------------------------------------------------------------------------------------------|
| YAR050W         | <i>FLO1,FLO4,FLO2</i> | 1.06               | Lectin-like protein involved in flocculation, cell wall protein that binds to mannose chains on the surface of other cells, confers floc-forming ability that is chymotrypsin sensitive and heat resistant; similar to Flo5p                          |
| YLR237W         | <i>THI7,THI10</i>     | 1.06               | Plasma membrane transporter responsible for the uptake of thiamine, member of the major facilitator superfamily of transporters; mutation of human ortholog causes thiamine-responsive megaloblastic anemia                                           |
| YER119C-A       |                       | 1.06               | Dubious open reading frame, not conserved in closely related <i>Saccharomyces</i> species; deletion mutation blocks replication of Brome mosaic virus in <i>S. cerevisiae</i> , but this is likely due to effects on the overlapping gene <i>SCS2</i> |
| YLR374C         |                       | 1.06               | Dubious open reading frame unlikely to encode a protein, based on available experimental and comparative sequence data; partially overlaps the uncharacterized ORF STP3/YLR375W                                                                       |
| YLR307W         | <i>CDA1</i>           | 1.07               | Chitin deacetylase, together with Cda2p involved in the biosynthesis ascospore wall component, chitosan; required for proper rigidity of the ascospore wall                                                                                           |
| YAL062W         | <i>GDH3,FUN51</i>     | 1.07               | NADP(+)-dependent glutamate dehydrogenase, synthesizes glutamate from ammonia and alpha-ketoglutarate; rate of alpha-ketoglutarate utilization differs from Gdh1p; expression regulated by nitrogen and carbon sources                                |
| YNR064C         |                       | 1.09               | Epoxide hydrolase, member of the alpha/beta hydrolase fold family; may have a role in detoxification of epoxides                                                                                                                                      |
| YJL038C         | <i>LOH1,OSW4</i>      | 1.09               | Protein of unknown function with proposed roles in maintenance of genome integrity and also in spore wall assembly; induced during sporulation; repressed during vegetative growth by Sum1p and Hst1p; sequence similar to IRC1                       |
| YBR296C         | <i>PHO89,ITN1</i>     | 1.11               | Na <sup>+</sup> /Pi cotransporter, active in early growth phase; similar to phosphate transporters of <i>Neurospora crassa</i> ; transcription regulated by inorganic phosphate concentrations and Pho4p                                              |
| YGL126W         | <i>SCS3,FIT2B</i>     | 1.13               | Protein required for inositol prototrophy, identified as an ortholog of the FIT family of proteins involved in triglyceride droplet biosynthesis; disputed role in the synthesis of inositol phospholipids from inositol                              |
| YKL216W         | <i>URA1</i>           | 1.13               | Dihydroorotate dehydrogenase, catalyzes the fourth enzymatic step in the de novo biosynthesis of pyrimidines, converting dihydroorotic acid into orotic acid                                                                                          |
| YLR363W-A       |                       | 1.13               | Putative protein of unknown function; green fluorescent protein (GFP)-fusion protein localizes to the nucleus                                                                                                                                         |
| YPL171C         | <i>OYE3,ZRG6</i>      | 1.14               | Conserved NADPH oxidoreductase containing flavin mononucleotide (FMN), homologous to Oye2p with slight differences in ligand binding and catalytic properties; expression induced in cells treated with the mycotoxin patulin                         |

**Supplemental Table S1: Genes differentially expressed more than two-fold between WT and *htbK123R* cells**

| Systematic name | Standard Name    | Log2 (Fold change) | Gene Ontology Annotation                                                                                                                                                                                                                   |
|-----------------|------------------|--------------------|--------------------------------------------------------------------------------------------------------------------------------------------------------------------------------------------------------------------------------------------|
| YDR524C-B       |                  | 1.14               | Putative protein of unknown function                                                                                                                                                                                                       |
| YGR032W         | <i>GSC2,FKS2</i> | 1.14               | Catalytic subunit of 1,3-beta-glucan synthase, involved in formation of the inner layer of the spore wall; activity positively regulated by Rho1p and negatively by Smk1p; has similarity to an alternate catalytic subunit, Fks1p (Gsc1p) |
| YLL005C         | <i>SPO75</i>     | 1.15               | Meiosis-specific protein of unknown function, required for spore wall formation during sporulation; dispensable for both nuclear divisions during meiosis                                                                                  |
| YNL113W         | <i>RPC19</i>     | 1.15               | RNA polymerase subunit AC19, common to RNA polymerases I and III                                                                                                                                                                           |
| YDL218W         |                  | 1.17               | Putative protein of unknown function; YDL218W transcription is regulated by Azf1p and induced by starvation and aerobic conditions; expression also induced in cells treated with the mycotoxin patulin                                    |
| YMR011W         | <i>HXT2</i>      | 1.17               | High-affinity glucose transporter of the major facilitator superfamily, expression is induced by low levels of glucose and repressed by high levels of glucose                                                                             |
| YHR126C         | <i>ANS1</i>      | 1.18               | Putative protein of unknown function; transcription dependent upon Azf1p                                                                                                                                                                   |
| YCL033C         | <i>MXR2,MSRB</i> | 1.19               | Methionine-R-sulfoxide reductase, involved in the response to oxidative stress; protects iron-sulfur clusters from oxidative inactivation along with MXR1; involved in the regulation of lifespan                                          |
| YAL067C         | <i>SEO1</i>      | 1.23               | Putative permease, member of the allantoate transporter subfamily of the major facilitator superfamily; mutation confers resistance to ethionine sulfoxide                                                                                 |
| YPR195C         |                  | 1.23               | Dubious open reading frame unlikely to encode a protein, based on available experimental and comparative sequence data                                                                                                                     |
| YJL088W         | <i>ARG3,argF</i> | 1.23               | Ornithine carbamoyltransferase (carbamoylphosphate:L-ornithine carbamoyltransferase), catalyzes the sixth step in the biosynthesis of the arginine precursor ornithine                                                                     |
| YML058W-A       | <i>HUG1</i>      | 1.24               | Protein involved in the Mec1p-mediated checkpoint pathway that responds to DNA damage or replication arrest, transcription is induced by DNA damage                                                                                        |
| YLR437C         | <i>DIF1</i>      | 1.25               | Protein that regulates the nuclear localization of ribonucleotide reductase Rnr2p and Rnr4p subunits; phosphorylated by Dun1p in response to DNA damage and degraded; N-terminal half has similarity to <i>S. pombe</i> Spd1 protein       |
| YPR015C         |                  | 1.25               | Putative protein of unknown function; overexpression causes a cell cycle delay or arrest                                                                                                                                                   |

**Supplemental Table S1: Genes differentially expressed more than two-fold between WT and *htbK123R* cells**

| Systematic name | Standard Name        | Log2 (Fold change) | Gene Ontology Annotation                                                                                                                                                                                                                                                                            |
|-----------------|----------------------|--------------------|-----------------------------------------------------------------------------------------------------------------------------------------------------------------------------------------------------------------------------------------------------------------------------------------------------|
| YPR005C         | <i>HAL1</i>          | 1.26               | Cytoplasmic protein involved in halotolerance; decreases intracellular Na <sup>+</sup> (via <i>Ena1p</i> ) and increases intracellular K <sup>+</sup> by decreasing efflux; expression repressed by <i>Ssn6p-Tup1p</i> and <i>Sko1p</i> and induced by NaCl, KCl, and sorbitol through <i>Gcn4p</i> |
| YLR434C         |                      | 1.26               | Dubious open reading frame unlikely to encode a protein, based on available experimental and comparative sequence data; partially overlaps the verified ORF <i>TSR2/YLR435W</i>                                                                                                                     |
| YMR122C         |                      | 1.28               | Dubious open reading frame unlikely to encode a functional protein, based on available experimental and comparative sequence data                                                                                                                                                                   |
| YPL056C         |                      | 1.30               | Putative protein of unknown function; deletion mutant is fluconazole resistant                                                                                                                                                                                                                      |
| YMR095C         | <i>SNO1</i>          | 1.33               | Protein of unconfirmed function, involved in pyridoxine metabolism; expression is induced during stationary phase; forms a putative glutamine amidotransferase complex with <i>Snz1p</i> , with <i>Sno1p</i> serving as the glutaminase                                                             |
| YOR382W         | <i>FIT2</i>          | 1.36               | Mannoprotein that is incorporated into the cell wall via a glycosylphosphatidylinositol (GPI) anchor, involved in the retention of siderophore-iron in the cell wall                                                                                                                                |
| YCL026C-A       | <i>FRM2, YCLX08C</i> | 1.38               | Protein of unknown function, involved in the integration of lipid signaling pathways with cellular homeostasis; expression induced in cells treated with the mycotoxin patulin; has similarity to bacterial nitroreductases                                                                         |
| YFL011W         | <i>HXT10</i>         | 1.38               | Putative hexose transporter, expressed at low levels and expression is repressed by glucose                                                                                                                                                                                                         |
| YHR032W-A       |                      | 1.39               | Dubious open reading frame unlikely to encode a protein, based on available experimental and comparative sequence data; partially overlaps the dubious ORF <i>YHR032C-A</i>                                                                                                                         |
| YDL241W         |                      | 1.40               | Putative protein of unknown function; <i>YDL241W</i> is not an essential gene                                                                                                                                                                                                                       |
| YLR307C-A       |                      | 1.41               | Putative protein of unknown function                                                                                                                                                                                                                                                                |
| YML083C         |                      | 1.42               | Putative protein of unknown function; strong increase in transcript abundance during anaerobic growth compared to aerobic growth; cells deleted for <i>YML083C</i> do not exhibit growth defects in anerobic or anaerobic conditions                                                                |
| YMR244W         |                      | 1.42               | Putative protein of unknown function                                                                                                                                                                                                                                                                |
| YDR534C         | <i>FIT1</i>          | 1.45               | Mannoprotein that is incorporated into the cell wall via a glycosylphosphatidylinositol (GPI) anchor, involved in the retention of siderophore-iron in the cell wall                                                                                                                                |
| YCL030C         | <i>HIS4</i>          | 1.54               | Multifunctional enzyme containing phosphoribosyl-ATP pyrophosphatase, phosphoribosyl-AMP cyclohydrolase, and histidinol dehydrogenase activities; catalyzes the second, third, ninth and tenth steps in histidine biosynthesis                                                                      |

**Supplemental Table S1: Genes differentially expressed more than two-fold between WT and *htbK123R* cells**

| Systematic name | Standard Name                   | Log2 (Fold change) | Gene Ontology Annotation                                                                                                                                                                                                                            |
|-----------------|---------------------------------|--------------------|-----------------------------------------------------------------------------------------------------------------------------------------------------------------------------------------------------------------------------------------------------|
| YNL195C         |                                 | 1.68               | Putative protein of unknown function; shares a promoter with YNL194C; the authentic, non-tagged protein is detected in highly purified mitochondria in high-throughput studies                                                                      |
| YJR150C         | <i>DAN1,CCW13</i>               | 1.70               | Cell wall mannoprotein with similarity to Tir1p, Tir2p, Tir3p, and Tir4p; expressed under anaerobic conditions, completely repressed during aerobic growth                                                                                          |
| YLL037W         |                                 | 1.74               | Dubious open reading frame unlikely to encode a functional protein; overlaps 3' end of essential PRP19 gene encoding an RNA splicing factor                                                                                                         |
| YOL058W         | <i>ARG1,ARG10</i>               | 1.78               | Argininosuccinate synthetase, catalyzes the formation of L-argininosuccinate from citrulline and L-aspartate in the arginine biosynthesis pathway; potential Cdc28p substrate                                                                       |
| YDL062W         |                                 | 1.80               | Dubious open reading frame unlikely to encode a protein, based on available experimental and comparative sequence data; partially overlaps uncharacterized ORF YDL063C; YDL062W is not essential                                                    |
| YNL270C         | <i>ALP1,APL1</i>                | 1.95               | Arginine transporter; expression is normally very low and it is unclear what conditions would induce significant expression                                                                                                                         |
| YJR047C         | <i>ANB1,eIF-5A, TIF51B,HYP1</i> | 1.95               | Translation elongation factor eIF-5A, previously thought to function in translation initiation; similar to and functionally redundant with Hyp2p; undergoes an essential hypusination modification; expressed under anaerobic conditions            |
| YLL053C         |                                 | 1.98               | Putative protein; in the Sigma 1278B strain background YLL053C is contiguous with AQY2 which encodes an aquaporin                                                                                                                                   |
| YFR023W         | <i>PES4</i>                     | 2.08               | Poly(A) binding protein, suppressor of DNA polymerase epsilon mutation, similar to Mip6p                                                                                                                                                            |
| YOR072W-A       |                                 | 2.10               | Dubious open reading frame unlikely to encode a protein, based on available experimental and comparative sequence data; partially overlaps the uncharacterized ORF YOR072W; originally identified by fungal homology and RT-PCR                     |
| YEL008W         |                                 | 2.21               | Hypothetical protein predicted to be involved in metabolism                                                                                                                                                                                         |
| YGL170C         | <i>SPO74</i>                    | 2.26               | Component of the meiotic outer plaque of the spindle pole body, involved in modifying the meiotic outer plaque that is required prior to prospore membrane formation                                                                                |
| YLL052C         | <i>AQY2</i>                     | 2.30               | Water channel that mediates the transport of water across cell membranes, only expressed in proliferating cells, controlled by osmotic signals, may be involved in freeze tolerance; disrupted by a stop codon in many <i>S. cerevisiae</i> strains |
| YCL074W         |                                 | 3.00               | Pseudogene: encodes fragment of Ty Pol protein                                                                                                                                                                                                      |
| YHR079C-A       | <i>SAE3</i>                     | --*                | Meiosis specific protein involved in DMC1-dependent meiotic recombination, forms heterodimer with Mei5p; proposed to be an assembly factor for Dmc1p                                                                                                |



\*Gene is not expressed in the wild-type cells, but is expressed in the *htbK123R* mutant.

\*\* All GO Annotations were retrieved from *Saccharomyces Cerevisiae* Genome Database ([www.yeastgenome.org](http://www.yeastgenome.org)).

**Supplemental Table S2: Genes differentially expressed more than two-fold between WT and *Δsir4* cells**

| Systematic name | Standard Name               | Log2 (Fold change) | Gene Ontology Annotation                                                                                                                                                                                                                        |
|-----------------|-----------------------------|--------------------|-------------------------------------------------------------------------------------------------------------------------------------------------------------------------------------------------------------------------------------------------|
| YGL032C         | <i>AGA2</i>                 | -5.54              | Adhesion subunit of a-agglutinin of a-cells, C-terminal sequence acts as a ligand for alpha-agglutinin (Sag1p) during agglutination, modified with O-linked oligomannosyl chains, linked to anchorage subunit Aga1p via two disulfide bonds     |
| YGR044C         | <i>RME1,CSP1</i>            | -5.10              | Zinc finger protein involved in control of meiosis; prevents meiosis by repressing IME1 expression and promotes mitosis by activating CLN2 expression; directly repressed by a1-alpha2 regulator; mediates cell type control of sporulation     |
| YBL016W         | <i>FUS3,DAC2</i>            | -4.71              | Mitogen-activated serine/threonine protein kinase involved in mating; phosphoactivated by Ste7p; substrates include Ste12p, Far1p, Bni1p, Sst2p; inhibits invasive growth during mating by phosphorylating Tec1p, promoting its degradation     |
| YDR461W         | <i>MFA1</i>                 | -4.66              | Mating pheromone a-factor, made by a cells; interacts with alpha cells to induce cell cycle arrest and other responses leading to mating; biogenesis involves C-terminal modification, N-terminal proteolysis, and export; also encoded by MFA2 |
| YFL026W         | <i>STE2</i>                 | -4.59              | Receptor for alpha-factor pheromone; seven transmembrane-domain GPCR that interacts with both pheromone and a heterotrimeric G protein to initiate the signaling response that leads to mating between haploid a and alpha cells                |
| YHR005C         | <i>GPA1,SCG1,DAC1,CDC70</i> | -4.57              | GTP-binding alpha subunit of the heterotrimeric G protein that couples to pheromone receptors; negatively regulates the mating pathway by sequestering G(beta) gamma and by triggering an adaptive response; activates Vps34p at the endosome   |
| YOR212W         | <i>STE4,HMD2</i>            | -3.88              | G protein beta subunit, forms a dimer with Ste18p to activate the mating signaling pathway, forms a heterotrimer with Gpa1p and Ste18p to dampen signaling; may recruit Rho1p to the polarized growth site during mating; contains WD40 repeats |
| YKL209C         | <i>STE6</i>                 | -3.81              | Plasma membrane ATP-binding cassette (ABC) transporter required for the export of a-factor, catalyzes ATP hydrolysis coupled to a-factor transport; contains 12 transmembrane domains and two ATP binding domains; expressed only in MATa cells |
| YIL015W         | <i>BAR1,SST1</i>            | -3.81              | Aspartyl protease secreted into the periplasmic space of mating type a cells, helps cells find mating partners, cleaves and inactivates alpha factor allowing cells to recover from alpha-factor-induced cell cycle arrest                      |
| YDR261W-B       |                             | -3.35              | Retrotransposon TYA Gag and TYB Pol genes; transcribed/translated as one unit; polyprotein is processed to make a nucleocapsid-like protein (Gag), reverse transcriptase (RT), protease (PR), and integrase (IN); similar to retroviral genes   |

**Supplemental Table S2: Genes differentially expressed more than two-fold between WT and *Δsir4* cells**

| Systematic name | Standard Name         | Log2 (Fold change) | Gene Ontology Annotation                                                                                                                                                                                                                        |
|-----------------|-----------------------|--------------------|-------------------------------------------------------------------------------------------------------------------------------------------------------------------------------------------------------------------------------------------------|
| YDR410C         | <i>STE14</i>          | -3.29              | Farnesyl cysteine-carboxyl methyltransferase, mediates the carboxyl methylation step during C-terminal CAAX motif processing of a-factor and RAS proteins in the endoplasmic reticulum, localizes to the ER membrane                            |
| YDL227C         | <i>HO</i>             | -3.24              | Site-specific endonuclease required for gene conversion at the MAT locus (homothallic switching) through the generation of a ds DNA break; expression restricted to mother cells in late G1 as controlled by Swi4p-Swi6p, Swi5p and Ash1p       |
| YOR214C         |                       | -3.15              | Putative protein of unknown function; YOR214C is not an essential gene                                                                                                                                                                          |
| YLR265C         | <i>NEJ1,LIF2</i>      | -2.79              | Protein involved in regulation of nonhomologous end joining; interacts with DNA ligase IV components Dnl4p and Lif1p; repressed by MAT heterozygosity; regulates cellular distribution of Lif1p                                                 |
| YDL160C-A       |                       | -2.67              | Putative protein of unknown function                                                                                                                                                                                                            |
| YBR157C         | <i>ICS2</i>           | -2.60              | Protein of unknown function; null mutation does not confer any obvious defects in growth, spore germination, viability, or carbohydrate utilization                                                                                             |
| YDR379C-A       |                       | -2.57              | Putative protein of unknown function; identified by homology with other fungi; GFP-fusion protein localized to the mitochondrion                                                                                                                |
| YDR103W         | <i>STE5,NUL3,HMD3</i> | -2.49              | Pheromone-response scaffold protein; binds Ste11p, Ste7p, and Fus3p kinases, forming a MAPK cascade complex that interacts with the plasma membrane and Ste4p-Ste18p; allosteric activator of Fus3p that facilitates Ste7p-mediated activation  |
| YBR293W         | <i>VBA2</i>           | -2.48              | Permease of basic amino acids in the vacuolar membrane                                                                                                                                                                                          |
| YLR410W-B       |                       | -2.44              | Retrotransposon TYA Gag and TYB Pol genes; transcribed/translated as one unit; polyprotein is processed to make a nucleocapsid-like protein (Gag), reverse transcriptase (RT), protease (PR), and integrase (IN); similar to retroviral genes   |
| YJL170C         | <i>ASG7</i>           | -2.38              | Protein that regulates signaling from a G protein beta subunit Ste4p and its relocalization within the cell; specific to a-cells and induced by alpha-factor                                                                                    |
| YOL104C         | <i>NDJ1,TAM1</i>      | -2.32              | Meiosis-specific telomere protein, required for bouquet formation, effective homolog pairing, ordered cross-over distribution, sister chromatid cohesion at meiotic telomeres, chromosomal segregation and telomere-led rapid prophase movement |
| YGL146C         | <i>RRT6</i>           | -2.29              | Putative protein of unknown function; non-essential gene identified in a screen for mutants with increased levels of rDNA transcription; contains two putative transmembrane spans, but no significant homology to other known proteins         |

**Supplemental Table S2: Genes differentially expressed more than two-fold between WT and *Δsir4* cells**

| Systematic name | Standard Name | Log2 (Fold change) | Gene Ontology Annotation                                                                                                                                                                                                                                 |
|-----------------|---------------|--------------------|----------------------------------------------------------------------------------------------------------------------------------------------------------------------------------------------------------------------------------------------------------|
| YOL052C-A       | <i>DDR2</i>   | -2.22              | Multistress response protein, expression is activated by a variety of xenobiotic agents and environmental or physiological stresses                                                                                                                      |
| YNL333W         | <i>SNZ2</i>   | -2.22              | Member of a stationary phase-induced gene family; transcription of <i>SNZ2</i> is induced prior to diauxic shift, and also in the absence of thiamin in a Thi2p-dependent manner; forms a coregulated gene pair with <i>SNO2</i> ; interacts with Thi11p |
| YJR086W         | <i>STE18</i>  | -2.16              | G protein gamma subunit, forms a dimer with Ste4p to activate the mating signaling pathway, forms a heterotrimer with Gpa1p and Ste4p to dampen signaling; C-terminus is palmitoylated and farnesylated, which are required for normal signaling         |
| YGL248W         | <i>PDE1</i>   | -2.09              | Low-affinity cyclic AMP phosphodiesterase, controls glucose and intracellular acidification-induced cAMP signaling, target of the cAMP-protein kinase A (PKA) pathway; glucose induces transcription and inhibits translation                            |
| YPL038W         | <i>MET31</i>  | -1.97              | Zinc-finger DNA-binding protein, involved in transcriptional regulation of the methionine biosynthetic genes, similar to Met32p                                                                                                                          |
| YAL018C         |               | -1.95              | Putative protein of unknown function                                                                                                                                                                                                                     |
| YJL157C         | <i>FAR1</i>   | -1.95              | Cyclin-dependent kinase inhibitor that mediates cell cycle arrest in response to pheromone; also forms a complex with Cdc24p, Ste4p, and Ste18p that may specify the direction of polarized growth during mating; potential Cdc28p substrate             |
| YAR071W         | <i>PHO11</i>  | -1.93              | One of three repressible acid phosphatases, a glycoprotein that is transported to the cell surface by the secretory pathway; induced by phosphate starvation and coordinately regulated by PHO4 and PHO2                                                 |
| YBR113W         |               | -1.93              | Dubious open reading frame unlikely to encode a protein, based on available experimental and comparative sequence data; partially overlaps the verified gene <i>CYC8</i>                                                                                 |
| YJL133C-A       |               | -1.92              | Putative protein of unknown function; the authentic, non-tagged protein is detected in highly purified mitochondria in high-throughput studies                                                                                                           |
| YDR170W-A       |               | -1.92              | Retrotransposon TYA Gag gene; Gag is a nucleocapsid protein that is the structural constituent of virus-like particles (VLPs); similar to retroviral Gag; YDR170W-A is part of a mutant retrotransposon                                                  |
| YOR343W-B       |               | -1.91              | Retrotransposon TYA Gag and TYB Pol genes; transcribed/translated as one unit; polyprotein is processed to make a nucleocapsid-like protein (Gag), reverse transcriptase (RT), protease (PR), and integrase (IN); similar to retroviral genes            |

**Supplemental Table S2: Genes differentially expressed more than two-fold between WT and *Δsir4* cells**

| Systematic name | Standard Name          | Log2 (Fold change) | Gene Ontology Annotation                                                                                                                                                                                                                        |
|-----------------|------------------------|--------------------|-------------------------------------------------------------------------------------------------------------------------------------------------------------------------------------------------------------------------------------------------|
| YOR284W         | <i>HUA2</i>            | -1.90              | Cytoplasmic protein of unknown function; computational analysis of large-scale protein-protein interaction data suggests a possible role in actin patch assembly                                                                                |
| YJR027W         |                        | -1.89              | Retrotransposon TYA Gag and TYB Pol genes; transcribed/translated as one unit; polyprotein is processed to make a nucleocapsid-like protein (Gag), reverse transcriptase (RT), protease (PR), and integrase (IN); similar to retroviral genes   |
| YHL044W         |                        | -1.86              | Putative integral membrane protein, member of DUP240 gene family; green fluorescent protein (GFP)-fusion protein localizes to the plasma membrane in a punctate pattern                                                                         |
| YPR027C         |                        | -1.85              | Putative protein of unknown function                                                                                                                                                                                                            |
| YBL100W-B       |                        | -1.83              | Retrotransposon TYA Gag and TYB Pol genes; transcribed/translated as one unit; polyprotein is processed to make a nucleocapsid-like protein (Gag), reverse transcriptase (RT), protease (PR), and integrase (IN); similar to retroviral genes   |
| YHR154W         | <i>RTT107,ESC4</i>     | -1.62              | Protein implicated in Mms22-dependent DNA repair during S phase, DNA damage induces phosphorylation by Mec1p at one or more SQ/TQ motifs; interacts with Mms22p and Slx4p; has four BRCT domains; has a role in regulation of Ty1 transposition |
| YPR122W         | <i>AXL1,STE22,FUS5</i> | -1.61              | Haploid specific endoprotease that performs one of two N-terminal cleavages during maturation of a-factor mating pheromone; required for axial budding pattern of haploid cells                                                                 |
| YHR105W         | <i>YPT35</i>           | -1.61              | Endosomal protein of unknown function that contains a phox (PX) homology domain and binds to both phosphatidylinositol-3-phosphate (PtdIns(3)P) and proteins involved in ER-Golgi or vesicular transport                                        |
| YJL164C         | <i>TPK1,SRA3,PKA1</i>  | -1.60              | cAMP-dependent protein kinase catalytic subunit; promotes vegetative growth in response to nutrients via the Ras-cAMP signaling pathway; inhibited by regulatory subunit Bcy1p in the absence of cAMP; partially redundant with Tpk2p and Tpk3p |
| YMR141W-A       |                        | -1.59              | Dubious open reading frame unlikely to encode a protein, based on available experimental and comparative sequence data; overlaps the verified gene RPL13B/YMR142C                                                                               |
| YJL107C         |                        | -1.57              | Putative protein of unknown function; expression is induced by activation of the HOG1 mitogen-activated signaling pathway and this induction is Hog1p/Pbs2p dependent; YJL107C and adjacent ORF, YJL108C are merged in related fungi            |

**Supplemental Table S2: Genes differentially expressed more than two-fold between WT and *Δsir4* cells**

| Systematic name | Standard Name          | Log2 (Fold change) | Gene Ontology Annotation                                                                                                                                                                                                                                      |
|-----------------|------------------------|--------------------|---------------------------------------------------------------------------------------------------------------------------------------------------------------------------------------------------------------------------------------------------------------|
| YKR034W         | <i>DAL80,UGA43</i>     | -1.57              | Negative regulator of genes in multiple nitrogen degradation pathways; expression is regulated by nitrogen levels and by Gln3p; member of the GATA-binding family, forms homodimers and heterodimers with Deh1p                                               |
| YMR013W-A       |                        | -1.55              | Dubious open reading frame unlikely to encode a protein, based on available experimental and comparative sequence data; completely overlaps the characterized snoRNA gene snR73                                                                               |
| YLR030W         |                        | -1.54              | Putative protein of unknown function                                                                                                                                                                                                                          |
| YBR158W         | <i>AMN1,CST13,ICS4</i> | -1.51              | Protein required for daughter cell separation, multiple mitotic checkpoints, and chromosome stability; contains 12 degenerate leucine-rich repeat motifs; expression is induced by the Mitotic Exit Network (MEN)                                             |
| YCL021W-A       |                        | -1.50              | Putative protein of unknown function                                                                                                                                                                                                                          |
| YBR083W         | <i>TEC1,ROC1</i>       | -1.48              | Transcription factor required for full Ty1 expression, Ty1-mediated gene activation, and haploid invasive and diploid pseudohyphal growth; TEA/ATTS DNA-binding domain family member                                                                          |
| YOR156C         | <i>NFI1,SIZ2</i>       | -1.48              | SUMO ligase, catalyzes the covalent attachment of SUMO (Smt3p) to proteins; involved in maintenance of proper telomere length                                                                                                                                 |
| YLR452C         | <i>SST2</i>            | -1.47              | GTPase-activating protein for Gpa1p, regulates desensitization to alpha factor pheromone; also required to prevent receptor-independent signaling of the mating pathway; member of the RGS (regulator of G-protein signaling) family                          |
| YHR097C         |                        | -1.47              | Putative protein of unknown function; green fluorescent protein (GFP)-fusion protein localizes to the cytoplasm and the nucleus                                                                                                                               |
| YLL026W         | <i>HSP104</i>          | -1.43              | Heat shock protein that cooperates with Ydj1p (Hsp40) and Ssa1p (Hsp70) to refold and reactivate previously denatured, aggregated proteins; responsive to stresses including: heat, ethanol, and sodium arsenite; involved in [PSI <sup>+</sup> ] propagation |
| YFL027C         | <i>GYP8</i>            | -1.43              | GTPase-activating protein for yeast Rab family members; Ypt1p is the preferred in vitro substrate but also acts on Sec4p, Ypt31p and Ypt32p; involved in the regulation of ER to Golgi vesicle transport                                                      |
| YMR173W         | <i>DDR48,FSP</i>       | -1.39              | DNA damage-responsive protein, expression is increased in response to heat-shock stress or treatments that produce DNA lesions; contains multiple repeats of the amino acid sequence NNDSYGS                                                                  |
| YMR170C         | <i>ALD2</i>            | -1.38              | Cytoplasmic aldehyde dehydrogenase, involved in ethanol oxidation and beta-alanine biosynthesis; uses NAD <sup>+</sup> as the preferred coenzyme; expression is stress induced and glucose repressed; very similar to Ald3p                                   |

**Supplemental Table S2: Genes differentially expressed more than two-fold between WT and *Δsir4* cells**

| Systematic name | Standard Name | Log2 (Fold change) | Gene Ontology Annotation                                                                                                                                                                                                                             |
|-----------------|---------------|--------------------|------------------------------------------------------------------------------------------------------------------------------------------------------------------------------------------------------------------------------------------------------|
| YPR170C         |               | -1.35              | Dubious open reading frame unlikely to encode a protein, based on available experimental and comparative sequence data; partially overlaps the dubious ORFs YPR169W-A and YPR170W-B                                                                  |
| YDR016C         | <i>DAD1</i>   | -1.35              | Essential subunit of the Dam1 complex (aka DASH complex), couples kinetochores to the force produced by MT depolymerization thereby aiding in chromosome segregation; is transferred to the kinetochore prior to mitosis                             |
| YPR121W         | <i>THI22</i>  | -1.31              | Protein with similarity to hydroxymethylpyrimidine phosphate kinases; member of a gene family with THI20 and THI21; not required for thiamine biosynthesis                                                                                           |
| YGR240C-A       |               | -1.30              | Putative protein of unknown function; identified by fungal homology and RT-PCR                                                                                                                                                                       |
| YER037W         | <i>PHM8</i>   | -1.30              | Protein of unknown function, expression is induced by low phosphate levels and by inactivation of Pho85p                                                                                                                                             |
| YOR386W         | <i>PHR1</i>   | -1.29              | DNA photolyase involved in photoreactivation, repairs pyrimidine dimers in the presence of visible light; induced by DNA damage; regulated by transcriptional repressor Rph1p                                                                        |
| YLR040C         |               | -1.27              | Putative protein of unknown function; localizes to the cell wall; predicted to be a GPI-attached protein; upregulated by Mcm1p-Alpha1p transcription factor; partially overlaps the dubious ORF YLR041W; YLR040C is not essential                    |
| YLR210W         | <i>CLB4</i>   | -1.26              | B-type cyclin involved in cell cycle progression; activates Cdc28p to promote the G2/M transition; may be involved in DNA replication and spindle assembly; accumulates during S phase and G2, then targeted for ubiquitin-mediated degradation      |
| YJL023C         | <i>PET130</i> | -1.26              | Protein required for respiratory growth; the authentic, non-tagged protein is detected in highly purified mitochondria in high-throughput studies                                                                                                    |
| YMR136W         | <i>GAT2</i>   | -1.25              | Protein containing GATA family zinc finger motifs; similar to Gln3p and Dal80p; expression repressed by leucine                                                                                                                                      |
| YDR380W         | <i>ARO10</i>  | -1.24              | Phenylpyruvate decarboxylase, catalyzes decarboxylation of phenylpyruvate to phenylacetaldehyde, which is the first specific step in the Ehrlich pathway                                                                                             |
| YHR087W         | <i>RTC3</i>   | -1.24              | Protein of unknown function involved in RNA metabolism; has structural similarity to SBDS, the human protein mutated in Shwachman-Diamond Syndrome (the yeast SBDS ortholog = SDO1); null mutation suppresses <i>cdc13-1</i> temperature sensitivity |
| YBR053C         |               | -1.23              | Putative protein of unknown function; induced by cell wall perturbation                                                                                                                                                                              |

**Supplemental Table S2: Genes differentially expressed more than two-fold between WT and *Δsir4* cells**

| Systematic name | Standard Name      | Log2 (Fold change) | Gene Ontology Annotation                                                                                                                                                                                                                      |
|-----------------|--------------------|--------------------|-----------------------------------------------------------------------------------------------------------------------------------------------------------------------------------------------------------------------------------------------|
| YBR046C         | <i>ZTA1</i>        | -1.22              | NADPH-dependent quinone reductase, GFP-tagged protein localizes to the cytoplasm and nucleus; has similarity to E. coli quinone oxidoreductase and to human zeta-crystallin                                                                   |
| YCR018C         | <i>SRD1</i>        | -1.21              | Protein involved in the processing of pre-rRNA to mature rRNA; contains a C2/C2 zinc finger motif; <i>srd1</i> mutation suppresses defects caused by the <i>rrp1-1</i> mutation                                                               |
| YDR003W         | <i>RCR2,SSH5</i>   | -1.20              | Vacuolar protein that presumably functions within the endosomal-vacuolar trafficking pathway, affecting events that determine whether plasma membrane proteins are degraded or routed to the plasma membrane; similar to Rcr1p                |
| YDR536W         | <i>STL1</i>        | -1.20              | Glycerol proton symporter of the plasma membrane, subject to glucose-induced inactivation, strongly but transiently induced when cells are subjected to osmotic shock                                                                         |
| YJL155C         | <i>FBP26</i>       | -1.20              | Fructose-2,6-bisphosphatase, required for glucose metabolism                                                                                                                                                                                  |
| YDL156W         |                    | -1.19              | Putative protein of unknown function; protein sequence contains three WD domains (WD-40 repeat); green fluorescent protein (GFP)-fusion protein localizes to the cytoplasm and nucleus                                                        |
| YGR169C-A       |                    | -1.18              | Putative protein of unknown function                                                                                                                                                                                                          |
| YLR151C         | <i>PCD1</i>        | -1.18              | Peroxisomal nudix pyrophosphatase with specificity for coenzyme A and CoA derivatives, may function to remove potentially toxic oxidized CoA disulfide from peroxisomes to maintain the capacity for beta-oxidation of fatty acids            |
| YJL203W         | <i>PRP21,SPP91</i> | -1.17              | Subunit of the SF3a splicing factor complex, required for spliceosome assembly                                                                                                                                                                |
| YDR139C         | <i>RUB1</i>        | -1.17              | Ubiquitin-like protein with similarity to mammalian NEDD8; conjugation (neddylation) substrates include the cullins Cdc53p, Rtt101p, and Cul3p; activated by Ula1p and Uba3p (E1 enzyme pair); conjugation mediated by Ubc12p (E2 enzyme)     |
| YEL025C         | <i>SRI1</i>        | -1.16              | Putative protein of unknown function; green fluorescent protein (GFP)-fusion protein localizes to both the cytoplasm and the nucleus                                                                                                          |
| YBL005W-B       |                    | -1.15              | Retrotransposon TYA Gag and TYB Pol genes; transcribed/translated as one unit; polyprotein is processed to make a nucleocapsid-like protein (Gag), reverse transcriptase (RT), protease (PR), and integrase (IN); similar to retroviral genes |



**Supplemental Table S2: Genes differentially expressed more than two-fold between WT and *Δsir4* cells**

| Systematic name | Standard Name            | Log2 (Fold change) | Gene Ontology Annotation                                                                                                                                                                                                                            |
|-----------------|--------------------------|--------------------|-----------------------------------------------------------------------------------------------------------------------------------------------------------------------------------------------------------------------------------------------------|
| YPL256C         | <i>CLN2</i>              | -1.15              | G1 cyclin involved in regulation of the cell cycle; activates Cdc28p kinase to promote the G1 to S phase transition; late G1 specific expression depends on transcription factor complexes, MBF (Swi6p-Mbp1p) and SBF (Swi6p-Swi4p)                 |
| YOR331C         |                          | -1.14              | Dubious open reading frame unlikely to encode a protein, based on available experimental and comparative sequence data; open reading frame overlaps the verified gene <i>VMA4/YOR332W</i>                                                           |
| YGR142W         | <i>BTN2</i>              | -1.14              | v-SNARE binding protein that facilitates specific protein retrieval from a late endosome to the Golgi; modulates arginine uptake, possible role in mediating pH homeostasis between the vacuole and plasma membrane H(+)-ATPase                     |
| YDR533C         | <i>HSP31</i>             | -1.14              | Possible chaperone and cysteine protease with similarity to <i>E. coli</i> Hsp31; member of the DJ-1/ThiJ/Pfpl superfamily, which includes human DJ-1 involved in Parkinson's disease; exists as a dimer and contains a putative metal-binding site |
| YDR320C-A       | <i>DAD4, HSK2</i>        | -1.14              | Essential subunit of the Dam1 complex (aka DASH complex), couples kinetochores to the force produced by MT depolymerization thereby aiding in chromosome segregation; is transferred to the kinetochore prior to mitosis                            |
| YNL325C         | <i>FIG4</i>              | -1.14              | Phosphatidylinositol 3,5-bisphosphate (PtdIns[3,5]P) phosphatase; required for efficient mating and response to osmotic shock; physically associates with and regulated by Vac14p; contains a SAC1-like domain                                      |
| YDL157C         |                          | -1.14              | Putative protein of unknown function; the authentic, non-tagged protein is detected in highly purified mitochondria in high-throughput studies                                                                                                      |
| YIL140W         | <i>AXL2, SRO4, BUD10</i> | -1.13              | Integral plasma membrane protein required for axial budding in haploid cells, localizes to the incipient bud site and bud neck; glycosylated by Pmt4p; potential Cdc28p substrate                                                                   |
| YAL017W         | <i>PSK1, FUN31</i>       | -1.12              | One of two (see also PSK2) PAS domain containing S/T protein kinases; coordinately regulates protein synthesis and carbohydrate metabolism and storage in response to a unknown metabolite that reflects nutritional status                         |
| YLR142W         | <i>PUT1</i>              | -1.12              | Proline oxidase, nuclear-encoded mitochondrial protein involved in utilization of proline as sole nitrogen source; PUT1 transcription is induced by Put3p in the presence of proline and the absence of a preferred nitrogen source                 |
| YHR067W         | <i>HTD2, RMD12</i>       | -1.10              | Mitochondrial 3-hydroxyacyl-thioester dehydratase involved in fatty acid biosynthesis, required for respiratory growth and for normal mitochondrial morphology                                                                                      |

**Supplemental Table S2: Genes differentially expressed more than two-fold between WT and *Δsir4* cells**

| Systematic name | Standard Name         | Log2 (Fold change) | Gene Ontology Annotation                                                                                                                                                                                                                         |
|-----------------|-----------------------|--------------------|--------------------------------------------------------------------------------------------------------------------------------------------------------------------------------------------------------------------------------------------------|
| YGR149W         |                       | -1.10              | Putative protein of unknown function; predicted to be an integral membrane protein                                                                                                                                                               |
| YMR045C         |                       | -1.10              | Retrotransposon TYA Gag and TYB Pol genes; transcribed/translated as one unit; polyprotein is processed to make a nucleocapsid-like protein (Gag), reverse transcriptase (RT), protease (PR), and integrase (IN); similar to retroviral genes    |
| YNL192W         | <i>CHS1,USA4</i>      | -1.09              | Chitin synthase I, requires activation from zymogenic form in order to catalyze the transfer of N-acetylglucosamine (GlcNAc) to chitin; required for repairing the chitin septum during cytokinesis; transcription activated by mating factor    |
| YDR251W         | <i>PAM1</i>           | -1.08              | Essential protein of unknown function; exhibits variable expression during colony morphogenesis; overexpression permits survival without protein phosphatase 2A, inhibits growth, and induces a filamentous phenotype                            |
| YIL111W         | <i>COX5B</i>          | -1.08              | Subunit Vb of cytochrome c oxidase, which is the terminal member of the mitochondrial inner membrane electron transport chain; predominantly expressed during anaerobic growth while its isoform Va (Cox5Ap) is expressed during aerobic growth  |
| YDR085C         | <i>AFR1</i>           | -1.07              | Protein required for pheromone-induced projection (shmoo) formation; regulates septin architecture during mating; has an RVXF motif that mediates targeting of Glc7p to mating projections; interacts with Cdc12p                                |
| YPR158W         | <i>CUR1</i>           | -1.06              | Protein of unknown function involved in destabilization of [URE3] prions; similar in sequence to Btn2p                                                                                                                                           |
| YIR002C         | <i>MPH1</i>           | -1.05              | Member of the DEAH family of helicases, functions in an error-free DNA damage bypass pathway that involves homologous recombination, binds to flap DNA and stimulates activity of Rad27p and Dna2p; mutations confer a mutator phenotype         |
| YPL240C         | <i>HSP82,HSP90</i>    | -1.04              | Hsp90 chaperone required for pheromone signaling and negative regulation of Hsf1p; docks with Tom70p for mitochondrial preprotein delivery; promotes telomerase DNA binding and nucleotide addition; interacts with Cns1p, Cpr6p, Cpr7p, Sti1p   |
| YJL019W         | <i>MPS3</i>           | -1.03              | Nuclear envelope protein required for SPB duplication and nuclear fusion; localizes to the SPB half bridge and at telomeres during meiosis; required with Ndj1p and Csm4p for meiotic bouquet formation and telomere-led rapid prophase movement |
| YDR074W         | <i>TPS2,PFK3,HOG2</i> | -1.02              | Phosphatase subunit of the trehalose-6-phosphate synthase/phosphatase complex, which synthesizes the storage carbohydrate trehalose; expression is induced by stress conditions and repressed by the Ras-cAMP pathway                            |

**Supplemental Table S2: Genes differentially expressed more than two-fold between WT and *Δsir4* cells**

| Systematic name | Standard Name                    | Log2 (Fold change) | Gene Ontology Annotation                                                                                                                                                                                                                                        |
|-----------------|----------------------------------|--------------------|-----------------------------------------------------------------------------------------------------------------------------------------------------------------------------------------------------------------------------------------------------------------|
| YER048W-A       | <i>ISD11</i>                     | -1.02              | Protein required for mitochondrial iron-sulfur cluster biosynthesis                                                                                                                                                                                             |
| YOR273C         | <i>TPO4</i>                      | -1.02              | Polyamine transport protein, recognizes spermine, putrescine, and spermidine; localizes to the plasma membrane; member of the major facilitator superfamily                                                                                                     |
| YGR194C         | <i>XKS1</i>                      | -1.02              | Xylulokinase, converts D-xylulose and ATP to xylulose 5-phosphate and ADP; rate limiting step in fermentation of xylulose; required for xylose fermentation by recombinant <i>S. cerevisiae</i> strains                                                         |
| YEL073C         |                                  | -1.01              | Putative protein of unknown function; located adjacent to ARS503 and the telomere on the left arm of chromosome V; regulated by inositol/choline                                                                                                                |
| YCR014C         | <i>POL4,POLX</i>                 | -1.01              | DNA polymerase IV, undergoes pair-wise interactions with Dnl4p-Lif1p and Rad27p to mediate repair of DNA double-strand breaks by non-homologous end joining (NHEJ); homologous to mammalian DNA polymerase beta                                                 |
| YIL101C         | <i>XBP1</i>                      | -1.01              | Transcriptional repressor that binds to promoter sequences of the cyclin genes, <i>CYS3</i> , and <i>SMF2</i> ; expression is induced by stress or starvation during mitosis, and late in meiosis; member of the Swi4p/Mbp1p family; potential Cdc28p substrate |
| YJL093C         | <i>TOK1,YPK1,YOR K,YKC1,DUK1</i> | -1.01              | Outward-rectifier potassium channel of the plasma membrane with two pore domains in tandem, each of which forms a functional channel permeable to potassium; carboxy tail functions to prevent inner gate closures; target of K1 toxin                          |
| YGL193C         |                                  | --*                | Haploid-specific gene repressed by a1-alpha2, turned off in <i>sir3</i> null strains, absence enhances the sensitivity of <i>rad52-327</i> cells to camptothecin almost 100-fold                                                                                |
| YNL145W         | <i>MFA2</i>                      | --*                | Mating pheromone a-factor, made by a cells; interacts with alpha cells to induce cell cycle arrest and other responses leading to mating; biogenesis involves C-terminal modification, N-terminal proteolysis, and export; also encoded by <i>MFA1</i>          |
| YLR055C         |                                  | 1.00               | Subunit of the SAGA transcriptional regulatory complex but not present in SAGA-like complex SLIK/SALSA, required for SAGA-mediated inhibition at some promoters                                                                                                 |
| YDR025W         | <i>VBA3</i>                      | 1.01               | Protein component of the small (40S) ribosomal subunit; identical to Rps11Bp and has similarity to <i>E. coli</i> S17 and rat S11 ribosomal proteins                                                                                                            |
| YKL043W         |                                  | 1.02               | Transcriptional activator that enhances pseudohyphal growth; regulates expression of <i>FLO11</i> , an adhesin required for pseudohyphal filament formation; similar to <i>StuA</i> , an <i>A. nidulans</i> developmental regulator; potential Cdc28p substrate |

**Supplemental Table S2: Genes differentially expressed more than two-fold between WT and *Δsir4* cells**

| Systematic name | Standard Name              | Log2 (Fold change) | Gene Ontology Annotation                                                                                                                                                                                                                              |
|-----------------|----------------------------|--------------------|-------------------------------------------------------------------------------------------------------------------------------------------------------------------------------------------------------------------------------------------------------|
| YMR122C         |                            | 1.07               | Dubious open reading frame unlikely to encode a functional protein, based on available experimental and comparative sequence data                                                                                                                     |
| YJR114W         | <i>HMRA1</i>               | 1.09               | Dubious open reading frame unlikely to encode a protein, based on available experimental and comparative sequence data; partially overlaps the verified ORF RSM7/YJR113C                                                                              |
| YPR099C         | <i>APC11</i>               | 1.09               | Dubious open reading frame unlikely to encode a protein, based on available experimental and comparative sequence data; partially overlaps the verified gene MRPL51/YPR100W                                                                           |
| YHR175W         | <i>BSC1</i>                | 1.09               | Putative low-affinity copper transporter of the vacuolar membrane; mutation confers resistance to toxic copper concentrations, while overexpression confers resistance to copper starvation                                                           |
| YGL209W         | <i>PRM7</i>                | 1.09               | Protein containing zinc fingers, involved in repression, along with Mig1p, of SUC2 (invertase) expression by high levels of glucose; binds to Mig1p-binding sites in SUC2 promoter                                                                    |
| YPR195C         | <i>STP4</i>                | 1.10               | Dubious open reading frame unlikely to encode a protein, based on available experimental and comparative sequence data                                                                                                                                |
| YFR036W         | <i>RPS11A</i>              | 1.10               | Subunit of the Anaphase-Promoting Complex/Cyclosome (APC/C), which is a ubiquitin-protein ligase required for degradation of anaphase inhibitors, including mitotic cyclins, during the metaphase/anaphase transition                                 |
| YEL033W         | <i>MTH1,HTR1,DGT1,BPC1</i> | 1.12               | Predicted metabolic role based on network analysis derived from ChIP experiments, a large-scale deletion study and localization of transcription factor binding sites; null mutant is sensitive to temperature oscillation in a <i>cdc13-1</i> mutant |
| YNL113W         |                            | 1.15               | RNA polymerase subunit AC19, common to RNA polymerases I and III                                                                                                                                                                                      |
| YMR070W         |                            | 1.16               | Nuclear transcription factor with two Cys2-His2 zinc fingers; involved in repression of a subset of hypoxic genes by Rox1p, repression of several DAN/TIR genes during aerobic growth, and repression of ergosterol biosynthetic genes                |
| YLR242C         |                            | 1.16               | Protein functioning in transport of glycosylphosphatidylinositol intermediates into the ER lumen; required for normal intracellular sterol distribution and for sphingolipid metabolism; similar to Nup120p and <i>C. elegans</i> R05H5.5 protein     |
| YPR133W-A       | <i>MTC7</i>                | 1.17               | Component of the TOM (translocase of outer membrane) complex responsible for recognition and initial import of all mitochondrially directed proteins; involved in transfer of precursors from the Tom70p and Tom20p receptors to the Tom40p pore      |

**Supplemental Table S2: Genes differentially expressed more than two-fold between WT and *Δsir4* cells**

| Systematic name | Standard Name            | Log2 (Fold change) | Gene Ontology Annotation                                                                                                                                                                                                                        |
|-----------------|--------------------------|--------------------|-------------------------------------------------------------------------------------------------------------------------------------------------------------------------------------------------------------------------------------------------|
| YDR277C         |                          | 1.18               | Negative regulator of the glucose-sensing signal transduction pathway, required for repression of transcription by Rgt1p; interacts with Rgt1p and the Snf3p and Rgt2p glucose sensors; phosphorylated by Yck1p, triggering Mth1p degradation   |
| YPR062W         |                          | 1.20               | Cytosine deaminase, zinc metalloenzyme that catalyzes the hydrolytic deamination of cytosine to uracil; of biomedical interest because it also catalyzes the deamination of 5-fluorocytosine (5FC) to form anticancer drug 5-fluorouracil (5FU) |
| YOR049C         | <i>CDC26,SCD26, HIT3</i> | 1.22               | Suppressor of sphingoid long chain base (LCB) sensitivity of an LCB-lyase mutation; putative integral membrane transporter or flippase that may transport LCBs from the cytoplasmic side toward the extracytoplasmic side of the membrane       |
| YDL008W         | <i>MIG2,MLZ1</i>         | 1.23               | Catalytic core subunit of the Anaphase-Promoting Complex/Cyclosome (APC/C), which is a ubiquitin-protein ligase required for degradation of anaphase inhibitors, including mitotic cyclins, during the metaphase/anaphase transition            |
| YPR123C         | <i>CTR2</i>              | 1.24               | Hypothetical protein                                                                                                                                                                                                                            |
| YDL048C         | <i>ARG3,argF</i>         | 1.25               | Protein containing a Kruppel-type zinc-finger domain; has similarity to Stp1p, Stp2p, and Stp3p                                                                                                                                                 |
| YJL088W         | <i>NCA3</i>              | 1.26               | Ornithine carbamoyltransferase (carbamoylphosphate:L-ornithine carbamoyltransferase), catalyzes the sixth step in the biosynthesis of the arginine precursor ornithine                                                                          |
| YJR115W         | <i>SRF2</i>              | 1.26               | Putative protein of unknown function                                                                                                                                                                                                            |
| YCR097W         | <i>PHD1</i>              | 1.33               | Silenced copy of a1 at HMR; homeobox corepressor that interacts with Alpha2p to repress haploid-specific gene transcription in diploid cells                                                                                                    |
| YLR374C         |                          | 1.35               | Dubious open reading frame unlikely to encode a protein, based on available experimental and comparative sequence data; partially overlaps the uncharacterized ORF STP3/YLR375W                                                                 |
| YDR327W         | <i>SPT8</i>              | 1.40               | Dubious open reading frame unlikely to encode a protein, based on experimental and comparative sequence data; partially overlaps the verified gene SKP1                                                                                         |
| YPL056C         |                          | 1.41               | Putative protein of unknown function; deletion mutant is fluconazole resistant                                                                                                                                                                  |
| YKR075C         | <i>ARV1</i>              | 1.43               | Protein of unknown function; similar to YOR062Cp and Reg1p; expression regulated by glucose and Rgt1p; GFP-fusion protein is induced in response to the DNA-damaging agent MMS                                                                  |
| YDR524C-B       |                          | 1.45               | Putative protein of unknown function                                                                                                                                                                                                            |

**Supplemental Table S2: Genes differentially expressed more than two-fold between WT and *Δsir4* cells**

| Systematic name | Standard Name     | Log2 (Fold change) | Gene Ontology Annotation                                                                                                                                                                                                       |
|-----------------|-------------------|--------------------|--------------------------------------------------------------------------------------------------------------------------------------------------------------------------------------------------------------------------------|
| YFL067W         |                   | 1.47               | Protein of unknown function, down-regulated at low calcium levels                                                                                                                                                              |
| YOR203W         |                   | 1.54               | Dubious open reading frame unlikely to encode a protein, based on available experimental and comparative sequence data; overlaps 5' end of essential DED1 gene required for translation initiation                             |
| YLR349W         | <i>MOT3,ROX7</i>  | 1.56               | Dubious open reading frame unlikely to encode a protein, based on available experimental and comparative sequence data; overlaps the verified ORF DIC1/YLR348C                                                                 |
| YFR017C         |                   | 1.59               | Putative protein of unknown function; green fluorescent protein (GFP)-fusion protein localizes to the cytoplasm and is induced in response to the DNA-damaging agent MMS; YFR017C is not an essential gene                     |
| YDL039C         | <i>RPC19</i>      | 1.60               | Pheromone-regulated protein, predicted to have one transmembrane segment; promoter contains Gcn4p binding elements                                                                                                             |
| YJL116C         | <i>RSB1</i>       | 1.61               | Protein that functions with Nca2p to regulate mitochondrial expression of subunits 6 (Atp6p) and 8 (Atp8p) of the Fo-F1 ATP synthase; member of the SUN family; expression induced in cells treated with the mycotoxin patulin |
| YDL037C         |                   | 1.66               | Protein of unconfirmed function, similar to cell surface flocculin Muc1p; ORF exhibits genomic organization compatible with a translational readthrough-dependent mode of expression                                           |
| YBL109W         |                   | 2.56               | Dubious open reading frame unlikely to encode a protein, based on experimental and comparative sequence data                                                                                                                   |
| YLR198C         | <i>FCY1,yCD</i>   | 3.05               | Dubious open reading frame unlikely to encode a protein, based on available experimental and comparative sequence data; overlaps the verified gene SIK1/YLR197W                                                                |
| YCL074W         |                   | 3.82               | Pseudogene: encodes fragment of Ty Pol protein                                                                                                                                                                                 |
| YCL069W         |                   | --***              | Permease of basic amino acids in the vacuolar membrane                                                                                                                                                                         |
| YCL076W         | <i>TOM5,MOM8A</i> | --***              | Dubious open reading frame unlikely to encode a protein, based on available experimental and comparative sequence data                                                                                                         |
| YDR544C         |                   | --***              | Dubious open reading frame unlikely to encode a functional protein, based on available experimental and comparative sequence data                                                                                              |

\* These genes were expressed in the wildtype strain, but not expressed in the *sir4Δ* mutant.

\*\*\* These genes were not expressed in the wildtype strain, but are expressed in the *sir4Δ* mutant.

**Supplemental Table S3: Genes differentially expressed more than two-fold between WT and *htbK123RΔsir4* cells**

| Systematic name | Standard Name  | Log2 (Fold change) | Gene Ontology Annotation                                                                                                                                                                                                                        |
|-----------------|----------------|--------------------|-------------------------------------------------------------------------------------------------------------------------------------------------------------------------------------------------------------------------------------------------|
| YDR227W         | UTH2,STE9,ASD1 | -7.46              | Silent information regulator that, together with SIR2 and SIR3, is involved in assembly of silent chromatin domains at telomeres and the silent mating-type loci; potentially phosphorylated by Cdc28p; some alleles of SIR4 prolong lifespan   |
| YNL145W         |                | -5.43              | Mating pheromone a-factor, made by a cells; interacts with alpha cells to induce cell cycle arrest and other responses leading to mating; biogenesis involves C-terminal modification, N-terminal proteolysis, and export; also encoded by MFA1 |
| YDR461W         |                | -5.07              | Mating pheromone a-factor, made by a cells; interacts with alpha cells to induce cell cycle arrest and other responses leading to mating; biogenesis involves C-terminal modification, N-terminal proteolysis, and export; also encoded by MFA2 |
| YFL026W         |                | -3.64              | Receptor for alpha-factor pheromone; seven transmembrane-domain GPCR that interacts with both pheromone and a heterotrimeric G protein to initiate the signaling response that leads to mating between haploid a and alpha cells                |
| YGL032C         |                | -3.37              | Adhesion subunit of a-agglutinin of a-cells, C-terminal sequence acts as a ligand for alpha-agglutinin (Sag1p) during agglutination, modified with O-linked oligomannosyl chains, linked to anchorage subunit Aga1p via two disulfide bonds     |
| YIL015W         | SST1           | -3.26              | Aspartyl protease secreted into the periplasmic space of mating type a cells, helps cells find mating partners, cleaves and inactivates alpha factor allowing cells to recover from alpha-factor-induced cell cycle arrest                      |
| YBL016W         | DAC2           | -3.18              | Mitogen-activated serine/threonine protein kinase involved in mating; phosphoactivated by Ste7p; substrates include Ste12p, Far1p, Bni1p, Sst2p; inhibits invasive growth during mating by phosphorylating Tec1p, promoting its degradation     |
| YDL227C         |                | -3.16              | Site-specific endonuclease required for gene conversion at the MAT locus (homothallic switching) through the generation of a ds DNA break; expression restricted to mother cells in late G1 as controlled by Swi4p-Swi6p, Swi5p and Ash1p       |
| YKL209C         |                | -3.11              | Plasma membrane ATP-binding cassette (ABC) transporter required for the export of a-factor, catalyzes ATP hydrolysis coupled to a-factor transport; contains 12 transmembrane domains and two ATP binding domains; expressed only in MATa cells |
| YGL193C         |                | -2.83              | Haploid-specific gene repressed by a1-alpha2, turned off in sir3 null strains, absence enhances the sensitivity of rad52-327 cells to camptothecin almost 100-fold                                                                              |

**Supplemental Table S3: Genes differentially expressed more than two-fold between WT and *htbK123RΔsir4* cells**

| Systematic name | Standard Name   | Log2 (Fold change) | Gene Ontology Annotation                                                                                                                                                                                                                                                 |
|-----------------|-----------------|--------------------|--------------------------------------------------------------------------------------------------------------------------------------------------------------------------------------------------------------------------------------------------------------------------|
| YLR265C         | LIF2            | -2.62              | Protein involved in regulation of nonhomologous end joining; interacts with DNA ligase IV components Dnl4p and Lif1p; repressed by MAT heterozygosity; regulates cellular distribution of Lif1p                                                                          |
| YPL061W         | ALD1            | -2.61              | Cytosolic aldehyde dehydrogenase, activated by Mg <sup>2+</sup> and utilizes NADP <sup>+</sup> as the preferred coenzyme; required for conversion of acetaldehyde to acetate; constitutively expressed; locates to the mitochondrial outer surface upon oxidative stress |
| YGR044C         | CSP1            | -2.60              | Zinc finger protein involved in control of meiosis; prevents meiosis by repressing IME1 expression and promotes mitosis by activating CLN2 expression; directly repressed by a1-alpha2 regulator; mediates cell type control of sporulation                              |
| YHR005C         | SCG1,DAC1,CDC70 | -2.46              | GTP-binding alpha subunit of the heterotrimeric G protein that couples to pheromone receptors; negatively regulates the mating pathway by sequestering G(beta) gamma and by triggering an adaptive response; activates Vps34p at the endosome                            |
| YKR039W         |                 | -2.44              | General amino acid permease; localization to the plasma membrane is regulated by nitrogen source                                                                                                                                                                         |
| YOR343W-B       |                 | -2.40              | Retrotransposon TYA Gag and TYB Pol genes; transcribed/translated as one unit; polyprotein is processed to make a nucleocapsid-like protein (Gag), reverse transcriptase (RT), protease (PR), and integrase (IN); similar to retroviral genes                            |
| YER133W-A       |                 | -2.37              | Dubious open reading frame unlikely to encode a protein, based on available experimental and comparative sequence data; partially overlaps uncharacterized gene YER134C.                                                                                                 |
| YDR410C         |                 | -2.19              | Farnesyl cysteine-carboxyl methyltransferase, mediates the carboxyl methylation step during C-terminal CAAX motif processing of a-factor and RAS proteins in the endoplasmic reticulum, localizes to the ER membrane                                                     |
| YJR073C         | PEM2            | -2.19              | Phospholipid methyltransferase (methylene-fatty-acyl-phospholipid synthase), catalyzes the last two steps in phosphatidylcholine biosynthesis                                                                                                                            |
| YDR261W-B       |                 | -2.17              | Retrotransposon TYA Gag and TYB Pol genes; transcribed/translated as one unit; polyprotein is processed to make a nucleocapsid-like protein (Gag), reverse transcriptase (RT), protease (PR), and integrase (IN); similar to retroviral genes                            |
| YOL052C-A       |                 | -2.05              | Multistress response protein, expression is activated by a variety of xenobiotic agents and environmental or physiological stresses                                                                                                                                      |



**Supplemental Table S3: Genes differentially expressed more than two-fold between WT and *htbK123RΔsir4* cells**

| Systematic name | Standard Name | Log2 (Fold change) | Gene Ontology Annotation                                                                                                                                                                                                                         |
|-----------------|---------------|--------------------|--------------------------------------------------------------------------------------------------------------------------------------------------------------------------------------------------------------------------------------------------|
| YLR410W-B       |               | -2.00              | Retrotransposon TYA Gag and TYB Pol genes; transcribed/translated as one unit; polyprotein is processed to make a nucleocapsid-like protein (Gag), reverse transcriptase (RT), protease (PR), and integrase (IN); similar to retroviral genes    |
| YBR293W         |               | -1.99              | Permease of basic amino acids in the vacuolar membrane                                                                                                                                                                                           |
| YAL061W         |               | -1.91              | Putative medium-chain alcohol dehydrogenase with similarity to BDH1; transcription induced by constitutively active PDR1 and PDR3                                                                                                                |
| YDL160C-A       |               | -1.86              | Putative protein of unknown function                                                                                                                                                                                                             |
| YPR009W         |               | -1.80              | Putative transcription factor; multicopy suppressor of mutations that cause low activity of the cAMP/protein kinase A pathway; highly similar to Sut1p                                                                                           |
| YFL027C         |               | -1.74              | GTPase-activating protein for yeast Rab family members; Ypt1p is the preferred in vitro substrate but also acts on Sec4p, Ypt31p and Ypt32p; involved in the regulation of ER to Golgi vesicle transport                                         |
| YER037W         |               | -1.73              | Protein of unknown function, expression is induced by low phosphate levels and by inactivation of Pho85p                                                                                                                                         |
| YMR013W-A       |               | -1.72              | Dubious open reading frame unlikely to encode a protein, based on available experimental and comparative sequence data; completely overlaps the characterized snoRNA gene snR73                                                                  |
| YLR346C         |               | -1.70              | Putative protein of unknown function found in mitochondria; expression is regulated by transcription factors involved in pleiotropic drug resistance, Pdr1p and Yrr1p; YLR346C is not an essential gene                                          |
| YNL054W-B       |               | -1.69              | TyB Gag-Pol protein; proteolytically processed to make the Gag, RT, PR, and IN proteins that are required for retrotransposition                                                                                                                 |
| YJR086W         |               | -1.68              | G protein gamma subunit, forms a dimer with Ste4p to activate the mating signaling pathway, forms a heterotrimer with Gpa1p and Ste4p to dampen signaling; C-terminus is palmitoylated and farnesylated, which are required for normal signaling |
| YDR506C         |               | -1.65              | Possible membrane-localized protein                                                                                                                                                                                                              |
| YGL248W         |               | -1.59              | Low-affinity cyclic AMP phosphodiesterase, controls glucose and intracellular acidification-induced cAMP signaling, target of the cAMP-protein kinase A (PKA) pathway; glucose induces transcription and inhibits translation                    |
| YOR077W         | YOR29-28      | -1.55              | Basic zinc-finger protein, similar to human and mouse Kin17 proteins which are chromatin-associated proteins involved in UV response and DNA replication                                                                                         |

**Supplemental Table S3: Genes differentially expressed more than two-fold between WT and *htbK123RΔsir4* cells**

| Systematic name | Standard Name | Log2 (Fold change) | Gene Ontology Annotation                                                                                                                                                                                                                                         |
|-----------------|---------------|--------------------|------------------------------------------------------------------------------------------------------------------------------------------------------------------------------------------------------------------------------------------------------------------|
| YDR502C         | ETH2          | -1.55              | S-adenosylmethionine synthetase, catalyzes transfer of the adenosyl group of ATP to the sulfur atom of methionine; one of two differentially regulated isozymes (Sam1p and Sam2p)                                                                                |
| YEL056W         |               | -1.53              | Subunit of the Hat1p-Hat2p histone acetyltransferase complex; required for high affinity binding of the complex to free histone H4, thereby enhancing Hat1p activity; similar to human RbAp46 and 48; has a role in telomeric silencing                          |
| YJL157C         |               | -1.51              | Cyclin-dependent kinase inhibitor that mediates cell cycle arrest in response to pheromone; also forms a complex with Cdc24p, Ste4p, and Ste18p that may specify the direction of polarized growth during mating; potential Cdc28p substrate                     |
| YMR045C         |               | -1.51              | Retrotransposon TYA Gag and TYB Pol genes; transcribed/translated as one unit; polyprotein is processed to make a nucleocapsid-like protein (Gag), reverse transcriptase (RT), protease (PR), and integrase (IN); similar to retroviral genes                    |
| YBL100W-B       |               | -1.50              | Retrotransposon TYA Gag and TYB Pol genes; transcribed/translated as one unit; polyprotein is processed to make a nucleocapsid-like protein (Gag), reverse transcriptase (RT), protease (PR), and integrase (IN); similar to retroviral genes                    |
| YDR100W         |               | -1.49              | Integral membrane protein localized to late Golgi vesicles along with the v-SNARE Tlg2p                                                                                                                                                                          |
| YBR113W         |               | -1.49              | Dubious open reading frame unlikely to encode a protein, based on available experimental and comparative sequence data; partially overlaps the verified gene <i>CYC8</i>                                                                                         |
| YGL149W         |               | -1.47              | Dubious open reading frame unlikely to encode a protein, based on available experimental and comparative sequence data; partially overlaps the verified ORF <i>INO80/YGL150C</i> .                                                                               |
| YNL142W         |               | -1.44              | Ammonium permease involved in regulation of pseudohyphal growth; belongs to a ubiquitous family of cytoplasmic membrane proteins that transport only ammonium (NH <sub>4</sub> <sup>+</sup> ); expression is under the nitrogen catabolite repression regulation |
| YDL156W         |               | -1.44              | Putative protein of unknown function; protein sequence contains three WD domains (WD-40 repeat); green fluorescent protein (GFP)-fusion protein localizes to the cytoplasm and nucleus                                                                           |
| YBR157C         |               | -1.43              | Protein of unknown function; null mutation does not confer any obvious defects in growth, spore germination, viability, or carbohydrate utilization                                                                                                              |

**Supplemental Table S3: Genes differentially expressed more than two-fold between WT and *htbK123RΔsir4* cells**

| Systematic name | Standard Name | Log2 (Fold change) | Gene Ontology Annotation                                                                                                                                                                                                                        |
|-----------------|---------------|--------------------|-------------------------------------------------------------------------------------------------------------------------------------------------------------------------------------------------------------------------------------------------|
| YER035W         |               | -1.42              | RNA-binding protein, activates mRNA decapping directly by binding to the mRNA substrate and enhancing the activity of the decapping proteins Dcp1p and Dcp2p; has a role in translation during heat stress                                      |
| YLR126C         |               | -1.41              | Putative protein of unknown function with similarity to glutamine amidotransferase proteins; has Aft1p-binding motif in the promoter; may be involved in copper and iron homeostasis; YLR126C is not an essential protein                       |
| YDR406W         |               | -1.40              | Plasma membrane ATP binding cassette (ABC) transporter, multidrug transporter and general stress response factor implicated in cellular detoxification; regulated by Pdr1p, Pdr3p and Pdr8p; promoter contains a PDR responsive element         |
| YJL107C         |               | -1.39              | Putative protein of unknown function; expression is induced by activation of the HOG1 mitogen-activated signaling pathway and this induction is Hog1p/Pbs2p dependent; YJL107C and adjacent ORF, YJL108C are merged in related fungi            |
| YDR016C         |               | -1.37              | Essential subunit of the Dam1 complex (aka DASH complex), couples kinetochores to the force produced by MT depolymerization thereby aiding in chromosome segregation; is transferred to the kinetochore prior to mitosis                        |
| YOL111C         | GET5,TMA24    | -1.36              | Protein required for efficient mating; involved in shmoo formation and nuclear migration in the pre-zygote; associates with ribosomes and interacts with Get4p; has a possible role in insertion of tail-anchored proteins into the ER membrane |
| YNL160W         |               | -1.35              | Cell wall-related secretory glycoprotein; induced by nutrient deprivation-associated growth arrest and upon entry into stationary phase; may be involved in adaptation prior to stationary phase entry; has similarity to Sps100p               |
| YHR037W         |               | -1.34              | Delta-1-pyrroline-5-carboxylate dehydrogenase, nuclear-encoded mitochondrial protein involved in utilization of proline as sole nitrogen source; deficiency of the human homolog causes HP11, an autosomal recessive inborn error of metabolism |
| YOR212W         | HMD2          | -1.33              | G protein beta subunit, forms a dimer with Ste18p to activate the mating signaling pathway, forms a heterotrimer with Gpa1p and Ste18p to dampen signaling; may recruit Rho1p to the polarized growth site during mating; contains WD40 repeats |
| YLR299W         | CIS2          | -1.31              | Gamma-glutamyltranspeptidase, major glutathione-degrading enzyme; involved in detoxification of electrophilic xenobiotics; expression induced mainly by nitrogen starvation                                                                     |

**Supplemental Table S3: Genes differentially expressed more than two-fold between WT and *htbK123RΔsir4* cells**

| Systematic name | Standard Name | Log2 (Fold change) | Gene Ontology Annotation                                                                                                                                                                                                                         |
|-----------------|---------------|--------------------|--------------------------------------------------------------------------------------------------------------------------------------------------------------------------------------------------------------------------------------------------|
| YBR083W         | ROC1          | -1.29              | Transcription factor required for full Ty1 expression, Ty1-mediated gene activation, and haploid invasive and diploid pseudohyphal growth; TEA/ATTS DNA-binding domain family member                                                             |
| YDR251W         |               | -1.29              | Essential protein of unknown function; exhibits variable expression during colony morphogenesis; overexpression permits survival without protein phosphatase 2A, inhibits growth, and induces a filamentous phenotype                            |
| YGL157W         |               | -1.29              | NADPH-dependent aldehyde reductase, utilizes aromatic and alicyclic aldehyde substrates; member of the short-chain dehydrogenase/reductase superfamily                                                                                           |
| YJL019W         | NEP98         | -1.28              | Nuclear envelope protein required for SPB duplication and nuclear fusion; localizes to the SPB half bridge and at telomeres during meiosis; required with Ndj1p and Csm4p for meiotic bouquet formation and telomere-led rapid prophase movement |
| YPR122W         | STE22,FUS5    | -1.28              | Haploid specific endoprotease that performs one of two N-terminal cleavages during maturation of a-factor mating pheromone; required for axial budding pattern of haploid cells                                                                  |
| YHL044W         |               | -1.27              | Putative integral membrane protein, member of DUP240 gene family; green fluorescent protein (GFP)-fusion protein localizes to the plasma membrane in a punctate pattern                                                                          |
| YLR082C         |               | -1.26              | Protein of unknown function; overexpression suppresses the lethality caused by a rad53 null mutation                                                                                                                                             |
| YPR124W         |               | -1.22              | High-affinity copper transporter of the plasma membrane, mediates nearly all copper uptake under low copper conditions; transcriptionally induced at low copper levels and degraded at high copper levels                                        |
| YFL010W-A       |               | -1.21              | Protein required for the negative regulation by ammonia of Gap1p, which is a general amino acid permease                                                                                                                                         |
| YBR073W         | TID1          | -1.21              | DNA-dependent ATPase, stimulates strand exchange by modifying the topology of double-stranded DNA; involved in recombinational repair of DNA double-strand breaks during mitosis and meiosis; proposed to be involved in crossover interference  |
| YER134C         |               | -1.21              | Putative protein of unknown function; non-essential gene                                                                                                                                                                                         |
| YKL096W         | YJU1          | -1.18              | Cell wall mannoprotein that localizes specifically to birth scars of daughter cells, linked to a beta-1,3- and beta-1,6-glucan heteropolymer through a phosphodiester bond; required for propionic acid resistance                               |

**Supplemental Table S3: Genes differentially expressed more than two-fold between WT and *htbK123RΔsir4* cells**

| Systematic name | Standard Name  | Log2 (Fold change) | Gene Ontology Annotation                                                                                                                                                                                                                         |
|-----------------|----------------|--------------------|--------------------------------------------------------------------------------------------------------------------------------------------------------------------------------------------------------------------------------------------------|
| YGR281W         | YRS1           | -1.17              | Plasma membrane ATP-binding cassette (ABC) transporter, multidrug transporter mediates export of many different organic anions including oligomycin; similar to human cystic fibrosis transmembrane receptor (CFTR)                              |
| YHL019C         |                | -1.17              | Protein of unknown function, homologous to the medium chain of mammalian clathrin-associated protein complex; involved in vesicular transport                                                                                                    |
| YNL078W         | JIP1           | -1.17              | Protein localized in the bud neck at G2/M phase; physically interacts with septins; possibly involved in a mitotic signaling network                                                                                                             |
| YBR158W         | CST13, ICS4    | -1.14              | Protein required for daughter cell separation, multiple mitotic checkpoints, and chromosome stability; contains 12 degenerate leucine-rich repeat motifs; expression is induced by the Mitotic Exit Network (MEN)                                |
| YNL258C         | RNS1           | -1.13              | Peripheral membrane protein needed for Golgi-to-ER retrograde traffic; forms a complex with Sec39p and Tip20p that interacts with ER SNAREs Sec20p and Use1p; component of the ER target site that interacts with coatamer; interacts with Cin5p |
| YOR153W         | STS1,YDR1,LEM1 | -1.12              | Plasma membrane ATP-binding cassette (ABC) transporter, multidrug transporter actively regulated by Pdr1p; also involved in steroid transport, cation resistance, and cellular detoxification during exponential growth                          |
| YPL231W         |                | -1.10              | Alpha subunit of fatty acid synthetase, which catalyzes the synthesis of long-chain saturated fatty acids; contains beta-ketoacyl reductase and beta-ketoacyl synthase activities; phosphorylated                                                |
| YJL155C         |                | -1.07              | Fructose-2,6-bisphosphatase, required for glucose metabolism                                                                                                                                                                                     |
| YMR015C         | CYP61          | -1.07              | C-22 sterol desaturase, a cytochrome P450 enzyme that catalyzes the formation of the C-22(23) double bond in the sterol side chain in ergosterol biosynthesis; may be a target of azole antifungal drugs                                         |
| YMR291W         |                | -1.07              | Putative kinase of unknown function; green fluorescent protein (GFP)-fusion protein localizes to the cytoplasm and nucleus; YMR291W is not an essential gene                                                                                     |
| YDL232W         |                | -1.06              | Subunit of the oligosaccharyltransferase complex of the ER lumen, which catalyzes protein asparagine-linked glycosylation; type I membrane protein required for incorporation of Ost3p or Ost6p into the OST complex                             |
| YIL140W         | SRO4,BUD10     | -1.06              | Integral plasma membrane protein required for axial budding in haploid cells, localizes to the incipient bud site and bud neck; glycosylated by Pmt4p; potential Cdc28p substrate                                                                |

**Supplemental Table S3: Genes differentially expressed more than two-fold between WT and *htbK123RΔsir4* cells**

| Systematic name | Standard Name | Log2 (Fold change) | Gene Ontology Annotation                                                                                                                                                                                                                            |
|-----------------|---------------|--------------------|-----------------------------------------------------------------------------------------------------------------------------------------------------------------------------------------------------------------------------------------------------|
| YOL108C         |               | -1.05              | Transcription factor required for derepression of inositol-choline-regulated genes involved in phospholipid synthesis; forms a complex, with Ino2p, that binds the inositol-choline-responsive element through a basic helix-loop-helix domain      |
| YLR153C         |               | -1.05              | Acetyl-coA synthetase isoform which, along with Acs1p, is the nuclear source of acetyl-coA for histone acetylation; mutants affect global transcription; required for growth on glucose; expressed under anaerobic conditions                       |
| YDL174C         |               | -1.05              | D-lactate dehydrogenase, oxidizes D-lactate to pyruvate, transcription is heme-dependent, repressed by glucose, and derepressed in ethanol or lactate; located in the mitochondrial inner membrane                                                  |
| YER088C-A       |               | -1.04              | Dubious open reading frame unlikely to encode a functional protein, based on available experimental and comparative sequence data                                                                                                                   |
| YLL038C         |               | -1.03              | Protein of unknown function, contains an N-terminal epsin-like domain; proposed to be involved in the trafficking of Arn1p in the absence of ferrichrome                                                                                            |
| YPL038W         |               | -1.03              | Zinc-finger DNA-binding protein, involved in transcriptional regulation of the methionine biosynthetic genes, similar to Met32p                                                                                                                     |
| YIL051C         | IBM1          | -1.02              | Mitochondrial protein involved in maintenance of the mitochondrial genome                                                                                                                                                                           |
| YDL128W         | MNR1,HUM1     | -1.01              | Vacuolar H <sup>+</sup> /Ca <sup>2+</sup> exchanger involved in control of cytosolic Ca <sup>2+</sup> concentration; has similarity to sodium/calcium exchangers, including the bovine Na <sup>+</sup> /Ca <sup>2+</sup> ,K <sup>+</sup> antiporter |
| YLR228C         |               | -1.01              | Sterol regulatory element binding protein, regulates transcription of sterol biosynthetic genes; contains Zn[2]-Cys[6] binuclear cluster; homologous to Upc2p; relocates from intracellular membranes to perinuclear foci on sterol depletion       |
| YLR452C         |               | -1.01              | GTPase-activating protein for Gpa1p, regulates desensitization to alpha factor pheromone; also required to prevent receptor-independent signaling of the mating pathway; member of the RGS (regulator of G-protein signaling) family                |
| YMR170C         |               | -1.01              | Cytoplasmic aldehyde dehydrogenase, involved in ethanol oxidation and beta-alanine biosynthesis; uses NAD <sup>+</sup> as the preferred coenzyme; expression is stress induced and glucose repressed; very similar to Ald3p                         |
| YHR066W         | SSF1          | 1.00               | Constituent of 66S pre-ribosomal particles, required for ribosomal large subunit maturation; functionally redundant with Ssf2p; member of the Brix family                                                                                           |

**Supplemental Table S3: Genes differentially expressed more than two-fold between WT and *htbK123RΔsir4* cells**

| Systematic name | Standard Name     | Log2 (Fold change) | Gene Ontology Annotation                                                                                                                                                                                                                       |
|-----------------|-------------------|--------------------|------------------------------------------------------------------------------------------------------------------------------------------------------------------------------------------------------------------------------------------------|
| YNL191W         | DUG3              | 1.01               | Probable glutamine amidotransferase, forms a complex with Dug1p and Dug2p to degrade glutathione (GSH) and other peptides containing a gamma-glu-X bond in an alternative pathway to GSH degradation by gamma-glutamyl transpeptidase (Ecm38p) |
| YLR303W         | MET17,MET25,MET15 | 1.01               | Methionine and cysteine synthase (O-acetyl homoserine-O-acetyl serine sulfhydrylase), required for sulfur amino acid synthesis                                                                                                                 |
| YNL110C         | NOP15             | 1.02               | Constituent of 66S pre-ribosomal particles, involved in 60S ribosomal subunit biogenesis; localizes to both nucleolus and cytoplasm                                                                                                            |
| YPL264C         |                   | 1.02               | Putative membrane protein of unknown function; physically interacts with Hsp82p; YPL264C is not an essential gene                                                                                                                              |
| YDR272W         | GLO2              | 1.03               | Cytoplasmic glyoxalase II, catalyzes the hydrolysis of S-D-lactoylglutathione into glutathione and D-lactate                                                                                                                                   |
| YGR087C         | PDC6              | 1.03               | Minor isoform of pyruvate decarboxylase, decarboxylates pyruvate to acetaldehyde, involved in amino acid catabolism; transcription is glucose- and ethanol-dependent, and is strongly induced during sulfur limitation                         |
| YLR134W         | PDC5              | 1.03               | Minor isoform of pyruvate decarboxylase, key enzyme in alcoholic fermentation, decarboxylates pyruvate to acetaldehyde, regulation is glucose- and ethanol-dependent, repressed by thiamine, involved in amino acid catabolism                 |
| YER062C         | HOR2,GPP2         | 1.03               | One of two redundant DL-glycerol-3-phosphatases (RHR2/GPP1 encodes the other) involved in glycerol biosynthesis; induced in response to hyperosmotic stress and oxidative stress, and during the diauxic transition                            |
| YHR139C         | SPS100            | 1.03               | Protein required for spore wall maturation; expressed during sporulation; may be a component of the spore wall; expression also induced in cells treated with the mycotoxin patulin                                                            |
| YDL168W         | SFA1,ADH5         | 1.04               | Bifunctional enzyme containing both alcohol dehydrogenase and glutathione-dependent formaldehyde dehydrogenase activities, functions in formaldehyde detoxification and formation of long chain and complex alcohols, regulated by Hog1p-Sko1p |
| YDL063C         |                   | 1.04               | Putative protein of unknown function; green fluorescent protein (GFP)-fusion protein localizes to the cytoplasm and nucleus; predicted to be involved in ribosome biogenesis                                                                   |
| YMR280C         | CAT8,MSP8,DIL1    | 1.04               | Zinc cluster transcriptional activator necessary for derepression of a variety of genes under non-fermentative growth conditions, active after diauxic shift, binds carbon source responsive elements                                          |

**Supplemental Table S3: Genes differentially expressed more than two-fold between WT and *htbK123RΔsir4* cells**

| Systematic name | Standard Name | Log2 (Fold change) | Gene Ontology Annotation                                                                                                                                                                                                                        |
|-----------------|---------------|--------------------|-------------------------------------------------------------------------------------------------------------------------------------------------------------------------------------------------------------------------------------------------|
| YNL308C         | KRI1          | 1.04               | Essential nucleolar protein required for 40S ribosome biogenesis; physically and functionally interacts with Krr1p                                                                                                                              |
| YDR059C         | UBC5          | 1.05               | Ubiquitin-conjugating enzyme that mediates selective degradation of short-lived, abnormal, or excess proteins, including histone H3; central component of the cellular stress response; expression is heat inducible                            |
| YJL103C         | GSM1          | 1.05               | Putative zinc cluster protein of unknown function; proposed to be involved in the regulation of energy metabolism, based on patterns of expression and sequence analysis                                                                        |
| YPR099C         |               | 1.06               | Dubious open reading frame unlikely to encode a protein, based on available experimental and comparative sequence data; partially overlaps the verified gene MRPL51/YPR100W                                                                     |
| YLR054C         | OSW2          | 1.06               | Protein of unknown function proposed to be involved in the assembly of the spore wall                                                                                                                                                           |
| YFL023W         | BUD27,URI1    | 1.06               | Protein involved in bud-site selection, nutrient signaling, and gene expression controlled by TOR kinase; diploid mutants show a random budding pattern rather than the wild-type bipolar pattern; plays a role in regulating Ty1 transposition |
| YLR307W         | CDA1          | 1.07               | Chitin deacetylase, together with Cda2p involved in the biosynthesis ascospore wall component, chitosan; required for proper rigidity of the ascospore wall                                                                                     |
| YJL116C         | NCA3          | 1.07               | Protein that functions with Nca2p to regulate mitochondrial expression of subunits 6 (Atp6p) and 8 (Atp8p) of the Fo-F1 ATP synthase; member of the SUN family; expression induced in cells treated with the mycotoxin patulin                  |
| YLR434C         |               | 1.07               | Dubious open reading frame unlikely to encode a protein, based on available experimental and comparative sequence data; partially overlaps the verified ORF TSR2/YLR435W                                                                        |
| YPR017C         | DSS4          | 1.07               | Guanine nucleotide dissociation stimulator for Sec4p, functions in the post-Golgi secretory pathway; binds zinc, found both on membranes and in the cytosol                                                                                     |
| YKL078W         | DHR2          | 1.08               | Predominantly nucleolar DEAH-box ATP-dependent RNA helicase, required for 18S rRNA synthesis                                                                                                                                                    |
| YGL111W         | NSA1          | 1.08               | Constituent of 66S pre-ribosomal particles, involved in 60S ribosomal subunit biogenesis                                                                                                                                                        |
| YGR103W         | NOP7,YPH1     | 1.08               | Component of several different pre-ribosomal particles; forms a complex with Ytm1p and Erb1p that is required for maturation of the large ribosomal subunit; required for exit from G <sub>0</sub> and the initiation of cell proliferation     |
| YGR248W         | SOL4          | 1.08               | 6-phosphogluconolactonase with similarity to Sol3p                                                                                                                                                                                              |



**Supplemental Table S3: Genes differentially expressed more than two-fold between WT and *htbK123RΔsir4* cells**

| Systematic name | Standard Name    | Log2 (Fold change) | Gene Ontology Annotation                                                                                                                                                                                                                  |
|-----------------|------------------|--------------------|-------------------------------------------------------------------------------------------------------------------------------------------------------------------------------------------------------------------------------------------|
| YMR095C         | SNO1             | 1.08               | Protein of unconfirmed function, involved in pyridoxine metabolism; expression is induced during stationary phase; forms a putative glutamine amidotransferase complex with Snz1p, with Sno1p serving as the glutaminase                  |
| YKL217W         | JEN1             | 1.08               | Lactate transporter, required for uptake of lactate and pyruvate; phosphorylated; expression is derepressed by transcriptional activator Cat8p during respiratory growth, and repressed in the presence of glucose, fructose, and mannose |
| YHR032W-A       |                  | 1.08               | Dubious open reading frame unlikely to encode a protein, based on available experimental and comparative sequence data; partially overlaps the dubious ORF YHR032C-A                                                                      |
| YLR068W         | FYV7             | 1.08               | Essential protein required for maturation of 18S rRNA; required for survival upon exposure to K1 killer toxin                                                                                                                             |
| YOR298W         | MUM3             | 1.08               | Protein of unknown function involved in the organization of the outer spore wall layers; has similarity to the tafazzins superfamily of acyltransferases                                                                                  |
| YGR129W         | SYF2,NTC31       | 1.09               | Member of the NineTeen Complex (NTC) that contains Prp19p and stabilizes U6 snRNA in catalytic forms of the spliceosome containing U2, U5, and U6 snRNAs; <i>isy1 syf2</i> cells have defective spindles activating cell cycle arrest     |
| YFR036W         | CDC26,SCD26,HIT3 | 1.09               | Subunit of the Anaphase-Promoting Complex/ Cyclosome (APC/C), which is a ubiquitin-protein ligase required for degradation of anaphase inhibitors, including mitotic cyclins, during the metaphase/ anaphase transition                   |
| YPL277C         |                  | 1.09               | Putative protein of unknown function; localized to the membranes; gene expression regulated by copper levels                                                                                                                              |
| YDR040C         | ENA1,PMR2,HOR6   | 1.09               | P-type ATPase sodium pump, involved in Na <sup>+</sup> and Li <sup>+</sup> efflux to allow salt tolerance                                                                                                                                 |
| YIL007C         | NAS2             | 1.09               | Proteasome-interacting protein involved in the assembly of the base subcomplex of the 19S proteasomal regulatory particle (RP); similar to mammalian proteasomal modulator subunit; non-essential gene; interacts with Rpn4p              |
| YNL277W         | MET2             | 1.09               | L-homoserine-O-acetyltransferase, catalyzes the conversion of homoserine to O-acetyl homoserine which is the first step of the methionine biosynthetic pathway                                                                            |
| YJL045W         |                  | 1.09               | Minor succinate dehydrogenase isozyme; homologous to Sdh1p, the major isozyme responsible for the oxidation of succinate and transfer of electrons to ubiquinone; induced during the diauxic shift in a Cat8p-dependent manner            |

**Supplemental Table S3: Genes differentially expressed more than two-fold between WT and *htbK123RΔsir4* cells**

| Systematic name | Standard Name       | Log2 (Fold change) | Gene Ontology Annotation                                                                                                                                                                                                                       |
|-----------------|---------------------|--------------------|------------------------------------------------------------------------------------------------------------------------------------------------------------------------------------------------------------------------------------------------|
| YKR045C         |                     | 1.09               | Putative protein of unknown function; epitope-tagged protein localizes to the cytoplasm                                                                                                                                                        |
| YPL230W         | USV1,NSF1           | 1.10               | Putative transcription factor containing a C2H2 zinc finger; mutation affects transcriptional regulation of genes involved in growth on non-fermentable carbon sources, response to salt stress and cell wall biosynthesis                     |
| YLR176C         | RFX1,CRT1           | 1.10               | Major transcriptional repressor of DNA-damage-regulated genes, recruits repressors Tup1p and Cyc8p to their promoters; involved in DNA damage and replication checkpoint pathway; similar to a family of mammalian DNA binding RFX1-4 proteins |
| YGL179C         | TOS3                | 1.11               | Protein kinase, related to and functionally redundant with Elm1p and Sak1p for the phosphorylation and activation of Snf1p; functionally orthologous to LKB1, a mammalian kinase associated with Peutz-Jeghers cancer-susceptibility syndrome  |
| YDR277C         | MTH1,HTR1,DGT1,BPC1 | 1.11               | Negative regulator of the glucose-sensing signal transduction pathway, required for repression of transcription by Rgt1p; interacts with Rgt1p and the Snf3p and Rgt2p glucose sensors; phosphorylated by Yck1p, triggering Mth1p degradation  |
| YNL248C         | RPA49               | 1.11               | RNA polymerase I subunit A49                                                                                                                                                                                                                   |
| YOL080C         | REX4                | 1.13               | Putative RNA exonuclease possibly involved in pre-rRNA processing and ribosome assembly                                                                                                                                                        |
| YBL039C         | URA7                | 1.13               | Major CTP synthase isozyme (see also URA8), catalyzes the ATP-dependent transfer of the amide nitrogen from glutamine to UTP, forming CTP, the final step in de novo biosynthesis of pyrimidines; involved in phospholipid biosynthesis        |
| YNL015W         | PBI2                | 1.13               | Cytosolic inhibitor of vacuolar proteinase B, required for efficient vacuole inheritance; with thioredoxin forms protein complex LMA1, which assists in priming SNARE molecules and promotes vacuole fusion                                    |
| YKL221W         | MCH2                | 1.13               | Protein with similarity to mammalian monocarboxylate permeases, which are involved in transport of monocarboxylic acids across the plasma membrane; mutant is not deficient in monocarboxylate transport                                       |
| YMR312W         | ELP6,KTI4.TOT6,HAP3 | 1.13               | Subunit of Elongator complex, which is required for modification of wobble nucleosides in tRNA; required for Elongator structural integrity                                                                                                    |
| YML116W         | ATR1,SNQ1           | 1.13               | Multidrug efflux pump of the major facilitator superfamily, required for resistance to aminotriazole and 4-nitroquinoline-N-oxide                                                                                                              |
| YLL062C         | MHT1                | 1.14               | S-methylmethionine-homocysteine methyltransferase, functions along with Sam4p in the conversion of S-adenosylmethionine (AdoMet) to methionine to control the methionine/AdoMet ratio                                                          |

**Supplemental Table S3: Genes differentially expressed more than two-fold between WT and *htbK123RΔsir4* cells**

| Systematic name | Standard Name | Log2 (Fold change) | Gene Ontology Annotation                                                                                                                                                                                                                        |
|-----------------|---------------|--------------------|-------------------------------------------------------------------------------------------------------------------------------------------------------------------------------------------------------------------------------------------------|
| YBR256C         | RIB5          | 1.14               | Riboflavin synthase; catalyzes the last step of the riboflavin biosynthesis pathway                                                                                                                                                             |
| YML042W         | CAT2,YCAT     | 1.14               | Carnitine acetyl-CoA transferase present in both mitochondria and peroxisomes, transfers activated acetyl groups to carnitine to form acetylcarnitine which can be shuttled across membranes                                                    |
| YOL041C         | NOP12         | 1.14               | Nucleolar protein involved in pre-25S rRNA processing and biogenesis of large 60S ribosomal subunit; contains an RNA recognition motif (RRM); binds to Ebp2; similar to Nop13p and Nsr1p                                                        |
| YER187W         |               | 1.14               | Putative protein of unknown function; induced in respiratory-deficient cells                                                                                                                                                                    |
| YBR296C         | PHO89,ITN1    | 1.14               | Na <sup>+</sup> /Pi cotransporter, active in early growth phase; similar to phosphate transporters of <i>Neurospora crassa</i> ; transcription regulated by inorganic phosphate concentrations and Pho4p                                        |
| YNL234W         |               | 1.15               | Protein of unknown function with similarity to globins; has a functional heme-binding domain; transcription is induced by hypoxia and other stress conditions; proposed to be involved in glucose signaling or metabolism; regulated by Rgt1p   |
| YJL009W         |               | 1.15               | Dubious open reading frame unlikely to encode a protein, based on available experimental and comparative sequence data; partially overlaps CCT8/YJL008C, a verified gene encoding a subunit of the cytosolic chaperonin Cct ring complex        |
| YPR071W         |               | 1.15               | Putative membrane protein; YPR071W is not an essential gene                                                                                                                                                                                     |
| YJR063W         | RPA12,RRN4    | 1.16               | RNA polymerase I subunit A12.2; contains two zinc binding domains, and the N terminal domain is responsible for anchoring to the RNA pol I complex                                                                                              |
| YCL030C         | HIS4          | 1.16               | Multifunctional enzyme containing phosphoribosyl-ATP pyrophosphatase, phosphoribosyl-AMP cyclohydrolase, and histidinol dehydrogenase activities; catalyzes the second, third, ninth and tenth steps in histidine biosynthesis                  |
| YNL141W         | AAH1          | 1.17               | Adenine deaminase (adenine aminohydrolase), converts adenine to hypoxanthine; involved in purine salvage; transcriptionally regulated by nutrient levels and growth phase; Aah1p degraded upon entry into quiescence via SCF and the proteasome |
| YCR054C         | CTR86         | 1.17               | Essential protein of unknown function; upstream region contains a Gcn4p responsive site suggesting a possible role in amino acid biosynthesis                                                                                                   |
| YLR312C         | QNQ1          | 1.18               | Putative protein of unknown function                                                                                                                                                                                                            |
| YNL113W         | RPC19         | 1.19               | RNA polymerase subunit AC19, common to RNA polymerases I and III                                                                                                                                                                                |

**Supplemental Table S3: Genes differentially expressed more than two-fold between WT and *htbK123RΔsir4* cells**

| Systematic name | Standard Name    | Log2 (Fold change) | Gene Ontology Annotation                                                                                                                                                                                                                         |
|-----------------|------------------|--------------------|--------------------------------------------------------------------------------------------------------------------------------------------------------------------------------------------------------------------------------------------------|
| YLR327C         | TMA10,RBF9       | 1.19               | Protein of unknown function that associates with ribosomes                                                                                                                                                                                       |
| YDR126W         | SWF1,PSL10       | 1.20               | Palmitoyltransferase that acts on the SNAREs Snc1p, Syn8p, Tlg1p and likely on all SNAREs; member of a family of putative palmitoyltransferases containing an Asp-His-His-Cys-cysteine rich (DHHC-CRD) domain; may have a role in vacuole fusion |
| YNL270C         | ALP1,APL1        | 1.20               | Arginine transporter; expression is normally very low and it is unclear what conditions would induce significant expression                                                                                                                      |
| YIL099W         | SGA1             | 1.20               | Intracellular sporulation-specific glucoamylase involved in glycogen degradation; induced during starvation of a/a diploids late in sporulation, but dispensable for sporulation                                                                 |
| YKL055C         | OAR1             | 1.21               | Mitochondrial 3-oxoacyl-[acyl-carrier-protein] reductase, may comprise a type II mitochondrial fatty acid synthase along with Mct1p                                                                                                              |
| YBR297W         | MAL33,MALR,MAL3R | 1.22               | MAL-activator protein, part of complex locus MAL3; nonfunctional in genomic reference strain S288C                                                                                                                                               |
| YKL001C         | MET14            | 1.22               | Adenylylsulfate kinase, required for sulfate assimilation and involved in methionine metabolism                                                                                                                                                  |
| YOR237W         | HES1,OSH5        | 1.22               | Protein implicated in the regulation of ergosterol biosynthesis; one of a seven member gene family with a common essential function and non-essential unique functions; similar to human oxysterol binding protein (OSBP)                        |
| YHR033W         |                  | 1.23               | Putative protein of unknown function; epitope-tagged protein localizes to the cytoplasm                                                                                                                                                          |
| YGL158W         | RCK1             | 1.24               | Protein kinase involved in the response to oxidative stress; identified as suppressor of <i>S. pombe</i> cell cycle checkpoint mutations                                                                                                         |
| YER011W         | TIR1,SRP1        | 1.24               | Cell wall mannoprotein of the Srp1p/Tip1p family of serine-alanine-rich proteins; expression is downregulated at acidic pH and induced by cold shock and anaerobiosis; abundance is increased in cells cultured without shaking                  |
| YDL048C         | STP4             | 1.24               | Protein containing a Kruppel-type zinc-finger domain; has similarity to Stp1p, Stp2p, and Stp3p                                                                                                                                                  |
| YDL037C         | BSC1             | 1.24               | Protein of unconfirmed function, similar to cell surface flocculin Muc1p; ORF exhibits genomic organization compatible with a translational readthrough-dependent mode of expression                                                             |
| YNL195C         |                  | 1.24               | Putative protein of unknown function; shares a promoter with YNL194C; the authentic, non-tagged protein is detected in highly purified mitochondria in high-throughput studies                                                                   |

**Supplemental Table S3: Genes differentially expressed more than two-fold between WT and *htbK123RΔsir4* cells**

| Systematic name | Standard Name | Log2 (Fold change) | Gene Ontology Annotation                                                                                                                                                                                                                         |
|-----------------|---------------|--------------------|--------------------------------------------------------------------------------------------------------------------------------------------------------------------------------------------------------------------------------------------------|
| YHR136C         | SPL2          | 1.25               | Protein with similarity to cyclin-dependent kinase inhibitors; downregulates low-affinity phosphate transport during phosphate limitation; overproduction suppresses a <i>plc1</i> null mutation; GFP-fusion protein localizes to the cytoplasm  |
| YBR093C         | PHO5,phoE     | 1.25               | Repressible acid phosphatase (1 of 3) that also mediates extracellular nucleotide-derived phosphate hydrolysis; secretory pathway derived cell surface glycoprotein; induced by phosphate starvation and coordinately regulated by PHO4 and PHO2 |
| YLL005C         | SPO75         | 1.25               | Meiosis-specific protein of unknown function, required for spore wall formation during sporulation; dispensable for both nuclear divisions during meiosis                                                                                        |
| YHL024W         | RIM4          | 1.25               | Putative RNA-binding protein required for the expression of early and middle sporulation genes                                                                                                                                                   |
| YER042W         | MXR1,MSRA     | 1.26               | Methionine-S-sulfoxide reductase, involved in the response to oxidative stress; protects iron-sulfur clusters from oxidative inactivation along with MXR2; involved in the regulation of lifespan                                                |
| YPL119C         | DBP1,LPH8     | 1.26               | Putative ATP-dependent RNA helicase of the DEAD-box protein family; mutants show reduced stability of the 40S ribosomal subunit scanning through 5' untranslated regions of mRNAs                                                                |
| YLL053C         |               | 1.28               | Putative protein; in the Sigma 1278B strain background YLL053C is contiguous with AQY2 which encodes an aquaporin                                                                                                                                |
| YDR274C         |               | 1.28               | Dubious open reading frame unlikely to encode a functional protein, based on available experimental and comparative sequence data                                                                                                                |
| YDR223W         | CRF1          | 1.29               | Transcriptional corepressor involved in repression of ribosomal protein (RP) gene transcription via the TOR signaling pathway which promotes accumulation of Crf1p in the nucleus; role in repression of RP genes varies by strain               |
| YMR096W         | SNZ1          | 1.29               | Protein involved in vitamin B6 biosynthesis; member of a stationary phase-induced gene family; coregulated with SNO1; interacts with Sno1p and with Yhr198p, perhaps as a multiprotein complex containing other Snz and Sno proteins             |
| YLL042C         | ATG10,APG10   | 1.30               | Conserved E2-like conjugating enzyme that mediates formation of the Atg12p-Atg5p conjugate, which is a critical step in autophagy                                                                                                                |
| YHR126C         | ANS1          | 1.33               | Putative protein of unknown function; transcription dependent upon Azf1p                                                                                                                                                                         |
| YMR244W         |               | 1.35               | Putative protein of unknown function                                                                                                                                                                                                             |

**Supplemental Table S3: Genes differentially expressed more than two-fold between WT and *htbK123RΔsir4* cells**

| Systematic name | Standard Name  | Log2 (Fold change) | Gene Ontology Annotation                                                                                                                                                                                                                         |
|-----------------|----------------|--------------------|--------------------------------------------------------------------------------------------------------------------------------------------------------------------------------------------------------------------------------------------------|
| YDL241W         |                | 1.35               | Putative protein of unknown function; YDL241W is not an essential gene                                                                                                                                                                           |
| YDR524W-C       |                | 1.36               | Putative protein of unknown function; small ORF identified by SAGE; deletion strains are moderately sensitive to the radiomimetic drug bleomycin                                                                                                 |
| YKR060W         | UTP30          | 1.37               | Subunit of U3-containing 90S preribosome complex involved in production of 18S rRNA and assembly of small ribosomal subunit                                                                                                                      |
| YPR143W         | RRP15          | 1.37               | Nucleolar protein, constituent of pre-60S ribosomal particles; required for proper processing of the 27S pre-rRNA at the A3 and B1 sites to yield mature 5.8S and 25S rRNAs                                                                      |
| YLR237W         | THI7,THI10     | 1.37               | Plasma membrane transporter responsible for the uptake of thiamine, member of the major facilitator superfamily of transporters; mutation of human ortholog causes thiamine-responsive megaloblastic anemia                                      |
| YPL250C         | ICY2           | 1.38               | Protein of unknown function; mobilized into polysomes upon a shift from a fermentable to nonfermentable carbon source; potential Cdc28p substrate                                                                                                |
| YOR351C         | MEK1,MRE4      | 1.38               | Meiosis-specific serine/threonine protein kinase, functions in meiotic checkpoint, promotes recombination between homologous chromosomes by suppressing double strand break repair between sister chromatids                                     |
| YNR050C         | LYS9,LYS13     | 1.39               | Saccharopine dehydrogenase (NADP+, L-glutamate-forming); catalyzes the formation of saccharopine from alpha-aminoadipate 6-semialdehyde, the seventh step in lysine biosynthesis pathway; exhibits genetic and physical interactions with TRM112 |
| YNL179C         | SRF6           | 1.41               | Dubious open reading frame, unlikely to encode a protein; not conserved in closely related <i>Saccharomyces</i> species; deletion in <i>cyr1</i> mutant results in loss of stress resistance                                                     |
| YHR092C         | HXT4,RAG1,LGT1 | 1.43               | High-affinity glucose transporter of the major facilitator superfamily, expression is induced by low levels of glucose and repressed by high levels of glucose                                                                                   |
| YNR063W         |                | 1.44               | Putative zinc-cluster protein of unknown function                                                                                                                                                                                                |
| YEL035C         | UTR5           | 1.45               | Protein of unknown function; transcription may be regulated by Gcr1p; essential for growth under standard (aerobic) conditions but not under anaerobic conditions                                                                                |
| YER179W         | DMC1,ISC2      | 1.45               | Meiosis-specific protein required for repair of double-strand breaks and pairing between homologous chromosomes; homolog of Rad51p and the bacterial RecA protein                                                                                |

**Supplemental Table S3: Genes differentially expressed more than two-fold between WT and *htbK123RΔsir4* cells**

| Systematic name | Standard Name | Log2 (Fold change) | Gene Ontology Annotation                                                                                                                                                                                                                            |
|-----------------|---------------|--------------------|-----------------------------------------------------------------------------------------------------------------------------------------------------------------------------------------------------------------------------------------------------|
| YMR120C         | ADE17         | 1.46               | Enzyme of 'de novo' purine biosynthesis containing both 5-aminoimidazole-4-carboxamide ribonucleotide transformylase and inosine monophosphate cyclohydrolase activities, isozyme of Ade16p; ade16 ade17 mutants require adenine and histidine      |
| YFR017C         |               | 1.46               | Putative protein of unknown function; green fluorescent protein (GFP)-fusion protein localizes to the cytoplasm and is induced in response to the DNA-damaging agent MMS; YFR017C is not an essential gene                                          |
| YLR037C         | PAU23,DAN2    | 1.46               | Cell wall mannoprotein with similarity to Tir1p, Tir2p, Tir3p, and Tir4p; member of the seripauperin multigene family encoded mainly in subtelomeric regions; expressed under anaerobic conditions, completely repressed during aerobic growth      |
| YDL039C         | PRM7,YDL038C  | 1.47               | Pheromone-regulated protein, predicted to have one transmembrane segment; promoter contains Gcn4p binding elements                                                                                                                                  |
| YPL056C         |               | 1.48               | Putative protein of unknown function; deletion mutant is fluconazole resistant                                                                                                                                                                      |
| YDR079W         | PET100        | 1.48               | Chaperone that specifically facilitates the assembly of cytochrome c oxidase, integral to the mitochondrial inner membrane; interacts with a subcomplex of subunits VII, VIIa, and VIII (Cox7p, Cox9p, and Cox8p) but not with the holoenzyme       |
| YER095W         | RAD51,MUT5    | 1.49               | Strand exchange protein, forms a helical filament with DNA that searches for homology; involved in the recombinational repair of double-strand breaks in DNA during vegetative growth and meiosis; homolog of Dmc1p and bacterial RecA protein      |
| YDR215C         |               | 1.50               | Dubious open reading frame unlikely to encode a protein, based on available experimental and comparative sequence data; null mutant displays elevated sensitivity to expression of a mutant huntingtin fragment or of alpha-synuclein               |
| YLL052C         | AQY2          | 1.51               | Water channel that mediates the transport of water across cell membranes, only expressed in proliferating cells, controlled by osmotic signals, may be involved in freeze tolerance; disrupted by a stop codon in many <i>S. cerevisiae</i> strains |
| YCR098C         | GIT1          | 1.52               | Plasma membrane permease, mediates uptake of glycerophosphoinositol and glycerophosphocholine as sources of the nutrients inositol and phosphate; expression and transport rate are regulated by phosphate and inositol availability                |
| YMR107W         | SPG4          | 1.52               | Protein required for survival at high temperature during stationary phase; not required for growth on nonfermentable carbon sources                                                                                                                 |

**Supplemental Table S3: Genes differentially expressed more than two-fold between WT and *htbK123RΔsir4* cells**

| Systematic name | Standard Name | Log2 (Fold change) | Gene Ontology Annotation                                                                                                                                                                                                                  |
|-----------------|---------------|--------------------|-------------------------------------------------------------------------------------------------------------------------------------------------------------------------------------------------------------------------------------------|
| YDR344C         |               | 1.54               | Dubious open reading frame unlikely to encode a functional protein, based on available experimental and comparative sequence data                                                                                                         |
| YDL182W         | LYS20         | 1.55               | Homocitrate synthase isozyme, catalyzes the condensation of acetyl-CoA and alpha-ketoglutarate to form homocitrate, which is the first step in the lysine biosynthesis pathway; highly similar to the other isozyme, Lys21p               |
| YCR097W         | HMRA1         | 1.55               | Silenced copy of a1 at HMR; homeobox corepressor that interacts with Alpha2p to repress haploid-specific gene transcription in diploid cells                                                                                              |
| YER128W         |               | 1.57               | Putative protein of unknown function                                                                                                                                                                                                      |
| YJL043W         |               | 1.58               | Putative protein of unknown function; YJL043W is a non-essential gene                                                                                                                                                                     |
| YNR034W-A       |               | 1.58               | Putative protein of unknown function; expression is regulated by Msn2p/Msn4p                                                                                                                                                              |
| YOR203W         |               | 1.58               | Dubious open reading frame unlikely to encode a protein, based on available experimental and comparative sequence data; overlaps 5' end of essential DED1 gene required for translation initiation                                        |
| YLR349W         |               | 1.59               | Dubious open reading frame unlikely to encode a protein, based on available experimental and comparative sequence data; overlaps the verified ORF DIC1/YLR348C                                                                            |
| YKR073C         |               | 1.59               | Dubious open reading frame unlikely to encode a protein, based on available experimental and comparative sequence data                                                                                                                    |
| YIL011W         | TIR3,YIB1     | 1.60               | Cell wall mannoprotein of the Srp1p/Tip1p family of serine-alanine-rich proteins; expressed under anaerobic conditions and required for anaerobic growth                                                                                  |
| YPL104W         | MSD1,LPG5     | 1.60               | Mitochondrial aspartyl-tRNA synthetase, required for acylation of aspartyl-tRNA; yeast and bacterial aspartyl-, asparaginy-, and lysyl-tRNA synthetases contain regions with high sequence similarity, suggesting a common ancestral gene |
| YEL070W         | DSF1          | 1.61               | Deletion suppressor of mpt5 mutation                                                                                                                                                                                                      |
| YLL037W         |               | 1.61               | Dubious open reading frame unlikely to encode a functional protein; overlaps 3' end of essential PRP19 gene encoding an RNA splicing factor                                                                                               |
| YBL098W         | BNA4          | 1.61               | Kynurenine 3-mono oxygenase, required for the de novo biosynthesis of NAD from tryptophan via kynurenine; expression regulated by Hst1p; putative therapeutic target for Huntington disease                                               |



**Supplemental Table S3: Genes differentially expressed more than two-fold between WT and *htbK123RΔsir4* cells**

| Systematic name | Standard Name  | Log2 (Fold change) | Gene Ontology Annotation                                                                                                                                                                                                                         |
|-----------------|----------------|--------------------|--------------------------------------------------------------------------------------------------------------------------------------------------------------------------------------------------------------------------------------------------|
| YLR400W         |                | 1.62               | Dubious open reading frame unlikely to encode a functional protein, based on available experimental and comparative sequence data                                                                                                                |
| YPR133W-A       | TOM5,MOM8A     | 1.63               | Component of the TOM (translocase of outer membrane) complex responsible for recognition and initial import of all mitochondrially directed proteins; involved in transfer of precursors from the Tom70p and Tom20p receptors to the Tom40p pore |
| YIL160C         | POT1,POX3,FOX3 | 1.63               | 3-ketoacyl-CoA thiolase with broad chain length specificity, cleaves 3-ketoacyl-CoA into acyl-CoA and acetyl-CoA during beta-oxidation of fatty acids                                                                                            |
| YOL058W         | ARG1,ARG10     | 1.64               | Arginosuccinate synthetase, catalyzes the formation of L-argininosuccinate from citrulline and L-aspartate in the arginine biosynthesis pathway; potential Cdc28p substrate                                                                      |
| YOL014W         |                | 1.65               | Putative protein of unknown function                                                                                                                                                                                                             |
| YLR363W-A       |                | 1.66               | Putative protein of unknown function; green fluorescent protein (GFP)-fusion protein localizes to the nucleus                                                                                                                                    |
| YDL181W         | INH1           | 1.68               | Protein that inhibits ATP hydrolysis by the F1F0-ATP synthase; inhibitory function is enhanced by stabilizing proteins Stf1p and Stf2p; has similarity to Stf1p; has a calmodulin-binding motif and binds calmodulin in vitro                    |
| YNL332W         | THI12          | 1.70               | Protein involved in synthesis of the thiamine precursor hydroxymethylpyrimidine (HMP); member of a subtelomeric gene family including THI5, THI11, THI12, and THI13                                                                              |
| YJL088W         | ARG3,argF      | 1.70               | Ornithine carbamoyltransferase (carbamoylphosphate:L-ornithine carbamoyltransferase), catalyzes the sixth step in the biosynthesis of the arginine precursor ornithine                                                                           |
| YFR026C         | ULI1           | 1.71               | Putative protein of unknown function involved in and induced by the endoplasmic reticulum unfolded protein response                                                                                                                              |
| YPR157W         |                | 1.73               | Putative protein of unknown function; induced by treatment with 8-methoxypsoralen and UVA irradiation                                                                                                                                            |
| YHR048W         | YHK8           | 1.74               | Presumed antiporter of the DHA1 family of multidrug resistance transporters; contains 12 predicted transmembrane spans; expression of gene is up-regulated in cells exhibiting reduced susceptibility to azoles                                  |
| YJL037W         | IRC18          | 1.75               | Putative protein of unknown function; expression induced in respiratory-deficient cells and in carbon-limited chemostat cultures; similar to adjacent ORF, YJL038C; null mutant displays increased levels of spontaneous Rad52p foci             |

**Supplemental Table S3: Genes differentially expressed more than two-fold between WT and *htbK123RΔsir4* cells**

| Systematic name | Standard Name | Log2 (Fold change) | Gene Ontology Annotation                                                                                                                                                                                                                        |
|-----------------|---------------|--------------------|-------------------------------------------------------------------------------------------------------------------------------------------------------------------------------------------------------------------------------------------------|
| YML083C         |               | 1.76               | Putative protein of unknown function; strong increase in transcript abundance during anaerobic growth compared to aerobic growth; cells deleted for YML083C do not exhibit growth defects in anerobic or anaerobic conditions                   |
| YNR064C         |               | 1.76               | Epoxide hydrolase, member of the alpha/beta hydrolase fold family; may have a role in detoxification of epoxides                                                                                                                                |
| YER067W         |               | 1.78               | Putative protein of unknown function; green fluorescent protein (GFP)-fusion protein localizes to the cytoplasm and nucleus; YER067W is not an essential gene; protein abundance is increased upon intracellular iron depletion                 |
| YJR150C         | DAN1,CCW13    | 1.80               | Cell wall mannoprotein with similarity to Tir1p, Tir2p, Tir3p, and Tir4p; expressed under anaerobic conditions, completely repressed during aerobic growth                                                                                      |
| YCL026C-A       | FRM2,YCLX08C  | 1.83               | Protein of unknown function, involved in the integration of lipid signaling pathways with cellular homeostasis; expression induced in cells treated with the mycotoxin patulin; has similarity to bacterial nitroreductases                     |
| YDL152W         |               | 1.83               | Dubious open reading frame unlikely to encode a protein, based on available experimental and comparative sequence data; partially overlaps the verified ORF SAS10/YDL153C, a component of the small ribosomal subunit processosome              |
| YPL171C         | OYE3,ZRG6     | 1.85               | Conserved NADPH oxidoreductase containing flavin mononucleotide (FMN), homologous to Oye2p with slight differences in ligand binding and catalytic properties; expression induced in cells treated with the mycotoxin patulin                   |
| YGR260W         | TNA1          | 1.86               | High affinity nicotinic acid plasma membrane permease, responsible for uptake of low levels of nicotinic acid; expression of the gene increases in the absence of extracellular nicotinic acid or para-aminobenzoate (PABA)                     |
| YFL051C         |               | 1.86               | Putative protein of unknown function; YFL051C is not an essential gene                                                                                                                                                                          |
| YER150W         | SPI1          | 1.87               | GPI-anchored cell wall protein involved in weak acid resistance; basal expression requires Msn2p/Msn4p; expression is induced under conditions of stress and during the diauxic shift; similar to Sed1p                                         |
| YLL017W         | SDC25         | 1.88               | Non-essential Ras guanine nucleotide exchange factor (GEF) localized to the membrane; expressed in poor nutrients and on non-fermentable carbon sources; homologous to CDC25; contains a stop codon in S288C; full-length gene includes YLL016W |
| YGR243W         | FMP43         | 1.93               | Putative protein of unknown function; expression regulated by osmotic and alkaline stresses; the authentic, non-tagged protein is detected in highly purified mitochondria in high-throughput studies                                           |

**Supplemental Table S3: Genes differentially expressed more than two-fold between WT and *htbK123RΔsir4* cells**

| Systematic name | Standard Name | Log2 (Fold change) | Gene Ontology Annotation                                                                                                                                                                                                                       |
|-----------------|---------------|--------------------|------------------------------------------------------------------------------------------------------------------------------------------------------------------------------------------------------------------------------------------------|
| YFL020C         | PAU5          | 1.95               | Member of the seripauperin multigene family encoded mainly in subtelomeric regions; induced during alcoholic fermentation; induced by low temperature and also by anaerobic conditions; negatively regulated by oxygen and repressed by heme   |
| YLR307C-A       |               | 1.97               | Putative protein of unknown function                                                                                                                                                                                                           |
| YDR029W         |               | 2.00               | Dubious ORF unlikely to encode a protein, based on available experimental and comparative sequence data                                                                                                                                        |
| YOR313C         | SPS4          | 2.00               | Protein whose expression is induced during sporulation; not required for sporulation; heterologous expression in <i>E. coli</i> induces the SOS response that senses DNA damage                                                                |
| YML131W         |               | 2.06               | Putative protein of unknown function with similarity to medium chain dehydrogenase/reductases; expression induced by stresses including osmotic shock, DNA damaging agents, and other chemicals; GFP-fusion protein localizes to the cytoplasm |
| YJR095W         | SFC1,ACR1     | 2.09               | Mitochondrial succinate-fumarate transporter, transports succinate into and fumarate out of the mitochondrion; required for ethanol and acetate utilization                                                                                    |
| YGL170C         | SPO74         | 2.10               | Component of the meiotic outer plaque of the spindle pole body, involved in modifying the meiotic outer plaque that is required prior to prospore membrane formation                                                                           |
| YJR047C         | ANB1,eIF-5A   | 2.10               | Translation elongation factor eIF-5A, previously thought to function in translation initiation; similar to and functionally redundant with Hyp2p; undergoes an essential hypusination modification; expressed under anaerobic conditions       |
| YEL039C         | CYC7          | 2.12               | Cytochrome c isoform 2, expressed under hypoxic conditions; electron carrier of the mitochondrial intermembrane space that transfers electrons from ubiquinone-cytochrome c oxidoreductase to cytochrome c oxidase during cellular respiration |
| YCL048W-A       |               | 2.15               | Putative protein of unknown function                                                                                                                                                                                                           |
| YER137C         |               | 2.18               | Putative protein of unknown function                                                                                                                                                                                                           |
| YIR034C         | LYS1          | 2.26               | Saccharopine dehydrogenase (NAD <sup>+</sup> , L-lysine-forming), catalyzes the conversion of saccharopine to L-lysine, which is the final step in the lysine biosynthesis pathway                                                             |
| YGR138C         | TPO2          | 2.28               | Polyamine transport protein specific for spermine; localizes to the plasma membrane; transcription of TPO2 is regulated by Haa1p; member of the major facilitator superfamily                                                                  |
| YIL014C-A       |               | 2.37               | Putative protein of unknown function                                                                                                                                                                                                           |

**Supplemental Table S3: Genes differentially expressed more than two-fold between WT and *htbK123RΔsir4* cells**

| Systematic name | Standard Name | Log2 (Fold change) | Gene Ontology Annotation                                                                                                                                                                                                                         |
|-----------------|---------------|--------------------|--------------------------------------------------------------------------------------------------------------------------------------------------------------------------------------------------------------------------------------------------|
| YEL008W         |               | 2.41               | Hypothetical protein predicted to be involved in metabolism                                                                                                                                                                                      |
| YOR072W-A       |               | 2.41               | Dubious open reading frame unlikely to encode a protein, based on available experimental and comparative sequence data; partially overlaps the uncharacterized ORF YOR072W; originally identified by fungal homology and RT-PCR                  |
| YDL021W         | GPM2          | 2.49               | Homolog of Gpm1p phosphoglycerate mutase, which converts 3-phosphoglycerate to 2-phosphoglycerate in glycolysis; may be non-functional derivative of a gene duplication event                                                                    |
| YGL033W         | HOP2          | 2.49               | Meiosis-specific protein that localizes to chromosomes, preventing synapsis between nonhomologous chromosomes and ensuring synapsis between homologs; complexes with Mnd1p to promote homolog pairing and meiotic double-strand break repair     |
| YFR023W         | PES4          | 2.52               | Poly(A) binding protein, suppressor of DNA polymerase epsilon mutation, similar to Mip6p                                                                                                                                                         |
| YER096W         | SHC1          | 2.56               | Sporulation-specific activator of Chs3p (chitin synthase III), required for the synthesis of the chitosan layer of ascospores; has similarity to Skt5p, which activates Chs3p during vegetative growth; transcriptionally induced at alkaline pH |
| YLR198C         |               | 2.70               | Dubious open reading frame unlikely to encode a protein, based on available experimental and comparative sequence data; overlaps the verified gene SIK1/YLR197W                                                                                  |
| YBR040W         | FIG1          | 2.70               | Integral membrane protein required for efficient mating; may participate in or regulate the low affinity Ca <sup>2+</sup> influx system, which affects intracellular signaling and cell-cell fusion during mating                                |
| YBL109W         |               | 2.75               | Dubious open reading frame unlikely to encode a protein, based on experimental and comparative sequence data                                                                                                                                     |
| YOL024W         |               | 2.77               | Putative protein of unknown function; predicted to have thiol-disulfide oxidoreductase active site                                                                                                                                               |
| YCR021C         | HSP30,YRO1    | 2.94               | Hydrophobic plasma membrane localized, stress-responsive protein that negatively regulates the H(+)-ATPase Pma1p; induced by heat shock, ethanol treatment, weak organic acid, glucose limitation, and entry into stationary phase               |
| YML058W-A       | HUG1          | 2.97               | Protein involved in the Mec1p-mediated checkpoint pathway that responds to DNA damage or replication arrest, transcription is induced by DNA damage                                                                                              |
| YLR308W         | CDA2          | 3.32               | Chitin deacetylase, together with Cda1p involved in the biosynthesis ascospore wall component, chitosan; required for proper rigidity of the ascospore wall                                                                                      |

**Supplemental Table S3: Genes differentially expressed more than two-fold between WT and *htbK123RΔsir4* cells**

| Systematic name | Standard Name | Log2 (Fold change) | Gene Ontology Annotation                                                                                                                                                                                                                      |
|-----------------|---------------|--------------------|-----------------------------------------------------------------------------------------------------------------------------------------------------------------------------------------------------------------------------------------------|
| YCL075W         |               | 3.33               | Pseudogene: encodes fragment of Ty Pol protein                                                                                                                                                                                                |
| YLL046C         | RNP1          | 3.64               | Ribonucleoprotein that contains two RNA recognition motifs (RRM)                                                                                                                                                                              |
| YFL015C         |               | 3.64               | Dubious open reading frame unlikely to encode a protein; partially overlaps dubious ORF YFL015W-A; YFL015C is not an essential gene                                                                                                           |
| YPL073C         |               | 3.83               | Dubious open reading frame unlikely to encode a protein, based on available experimental and comparative sequence data; completely overlaps with verified gene UBP16/YPL072W; may interact with ribosome based on co-purification experiments |
| YOR255W         | OSW1          | 3.92               | Protein involved in sporulation; required for the construction of the outer spore wall layers; required for proper localization of Spo14p                                                                                                     |
| YCL074W         |               | 4.08               | Pseudogene: encodes fragment of Ty Pol protein                                                                                                                                                                                                |
| YCL069W         | VBA3          | --*                | Permease of basic amino acids in the vacuolar membrane                                                                                                                                                                                        |
| YCL073C         |               | --*                | Protein of unconfirmed function; displays a topology characteristic of the Major Facilitators Superfamily of membrane proteins; coding sequence 98% identical to that of YKR106W                                                              |
| YCL076W         |               | --*                | Dubious open reading frame unlikely to encode a protein, based on available experimental and comparative sequence data                                                                                                                        |
| YDR544C         |               | --*                | Dubious open reading frame unlikely to encode a functional protein, based on available experimental and comparative sequence data                                                                                                             |
| YFR057W         |               | --*                | Putative protein of unknown function                                                                                                                                                                                                          |
| YGR273C         |               | --*                | Putative protein of unknown function; expression downregulated by treatment with 8-methoxypsoralen plus UVA irradiation; YGR273C is not an essential gene                                                                                     |
| YOR186W         |               | --*                | Putative protein of unknown function; proper regulation of expression during heat stress is sphingolipid-dependent                                                                                                                            |

\* These genes were not expressed in the wild-type strain, but are expressed in the *htbK123RΔsir4* mutant.

**Supplemental Table S4: Genes differentially expressed in the *htbK123R* mutant and responsive to subsequent *SIR4* deletion**

| Systematic name | Standard Name | Log2 (Fold change <i>htbK123R/WT</i> ) | Log2 (Fold change <i>htbK123R<math>\Delta</math>sir4/htbK123R</i> ) | Gene Ontology Annotation                                                                                                                                                                                                                              |
|-----------------|---------------|----------------------------------------|---------------------------------------------------------------------|-------------------------------------------------------------------------------------------------------------------------------------------------------------------------------------------------------------------------------------------------------|
| YCL074W         |               | 2.99                                   | 1.08                                                                | Pseudogene: encodes fragment of Ty Pol protein                                                                                                                                                                                                        |
| YML058W-A       | HUG1          | 1.23                                   | 1.73                                                                | Protein involved in the Mec1p-mediated checkpoint pathway that responds to DNA damage or replication arrest, transcription is induced by DNA damage                                                                                                   |
| YPL171C         | OYE3          | 1.14                                   | 0.71                                                                | Conserved NADPH oxidoreductase containing flavin mononucleotide (FMN), homologous to Oye2p with different ligand binding and catalytic properties; has potential roles in oxidative stress response and programmed cell death                         |
| YNR064C         |               | 1.09                                   | 0.67                                                                | Epoxide hydrolase, member of the alpha/beta hydrolase fold family; may have a role in detoxification of epoxides                                                                                                                                      |
| YJL037W         | IRC18         | 1.04                                   | 0.70                                                                | Putative protein of unknown function; expression induced in respiratory-deficient cells and in carbon-limited chemostat cultures; similar to adjacent ORF, YJL038C; null mutant displays increased levels of spontaneous Rad52p foci                  |
| YLR349W         |               | 1.02                                   | 0.57                                                                | Dubious open reading frame unlikely to encode a protein, based on available experimental and comparative sequence data; overlaps the verified ORF DIC1/YLR348C                                                                                        |
| YBR093C         | PHO5          | 1.01                                   | 0.25                                                                | Repressible acid phosphatase (1 of 3) that also mediates extracellular nucleotide-derived phosphate hydrolysis; secretory pathway derived cell surface glycoprotein; induced by phosphate starvation and coordinately regulated by PHO4 and PHO2      |
| YFR026C         | ULI1          | 0.97                                   | 0.73                                                                | Putative protein of unknown function involved in and induced by the endoplasmic reticulum unfolded protein response                                                                                                                                   |
| YMR120C         | ADE17         | 0.96                                   | 0.50                                                                | Enzyme of 'de novo' purine biosynthesis containing both 5-aminoimidazole-4-carboxamide ribonucleotide transformylase and inosine monophosphate cyclohydrolase activities, isozyme of Ade16p; <i>ade16 ade17</i> mutants require adenine and histidine |
| YDR524W-C       |               | 0.90                                   | 0.46                                                                | Putative protein of unknown function; small ORF identified by SAGE; deletion strains are moderately sensitive to the radiomimetic drug bleomycin                                                                                                      |

**Supplemental Table S4: Genes differentially expressed in the *htbK123R* mutant and responsive to subsequent *SIR4* deletion**

| Systematic name | Standard Name | Log2 (Fold change <i>htbK123R/WT</i> ) | Log2 (Fold change <i>htbK123R<math>\Delta</math>sir4/htbK123R</i> ) | Gene Ontology Annotation                                                                                                                                                                                                                        |
|-----------------|---------------|----------------------------------------|---------------------------------------------------------------------|-------------------------------------------------------------------------------------------------------------------------------------------------------------------------------------------------------------------------------------------------|
| YOR203W         |               | 0.89                                   | 0.69                                                                | Dubious open reading frame unlikely to encode a protein, based on available experimental and comparative sequence data; overlaps 5' end of essential DED1 gene required for translation initiation                                              |
| YHR033W         |               | 0.88                                   | 0.35                                                                | Putative protein of unknown function; epitope-tagged protein localizes to the cytoplasm                                                                                                                                                         |
| YFR017C         |               | 0.86                                   | 0.60                                                                | Putative protein of unknown function; green fluorescent protein (GFP)-fusion protein localizes to the cytoplasm and is induced in response to the DNA-damaging agent MMS; YFR017C is not an essential gene                                      |
| YBL039C         | URA7          | 0.82                                   | 0.30                                                                | Major CTP synthase isozyme (see also URA8), catalyzes the ATP-dependent transfer of the amide nitrogen from glutamine to UTP, forming CTP, the final step in de novo biosynthesis of pyrimidines; involved in phospholipid biosynthesis         |
| YHR136C         | SPL2          | 0.81                                   | 0.43                                                                | Protein with similarity to cyclin-dependent kinase inhibitors; downregulates low-affinity phosphate transport during phosphate limitation; overproduction suppresses a <i>plc1</i> null mutation; GFP-fusion protein localizes to the cytoplasm |
| YGL111W         | NSA1          | 0.78                                   | 0.29                                                                | Constituent of 66S pre-ribosomal particles, involved in 60S ribosomal subunit biogenesis                                                                                                                                                        |
| YHR092C         | HXT4          | 0.78                                   | 0.67                                                                | High-affinity glucose transporter of the major facilitator superfamily, expression is induced by low levels of glucose and repressed by high levels of glucose                                                                                  |
| YGR138C         | TPO2          | 0.74                                   | 1.53                                                                | Polyamine transport protein specific for spermine; localizes to the plasma membrane; transcription of TPO2 is regulated by Haa1p; member of the major facilitator superfamily                                                                   |
| YBL098W         | BNA4          | 0.73                                   | 0.88                                                                | Kynurenine 3-mono oxygenase, required for the de novo biosynthesis of NAD from tryptophan via kynurenine; expression regulated by Hst1p; putative therapeutic target for Huntington disease                                                     |
| YGR260W         | TNA1          | 0.73                                   | 1.13                                                                | High affinity nicotinic acid plasma membrane permease, responsible for uptake of low levels of nicotinic acid; expression of the gene increases in the absence of extracellular nicotinic acid or para-aminobenzoate (PABA)                     |

**Supplemental Table S4: Genes differentially expressed in the *htbK123R* mutant and responsive to subsequent *SIR4* deletion**

| Systematic name | Standard Name | Log2 (Fold change <i>htbK123R/WT</i> ) | Log2 (Fold change <i>htbK123R<math>\Delta</math>sir4/htbK123R</i> ) | Gene Ontology Annotation                                                                                                                                                                                                                        |
|-----------------|---------------|----------------------------------------|---------------------------------------------------------------------|-------------------------------------------------------------------------------------------------------------------------------------------------------------------------------------------------------------------------------------------------|
| YNL141W         | AAH1          | 0.71                                   | 0.46                                                                | Adenine deaminase (adenine aminohydrolase), converts adenine to hypoxanthine; involved in purine salvage; transcriptionally regulated by nutrient levels and growth phase; Aah1p degraded upon entry into quiescence via SCF and the proteasome |
| YLR303W         | MET17         | 0.71                                   | 0.30                                                                | Methionine and cysteine synthase (O-acetyl homoserine-O-acetyl serine sulfhydrylase), required for sulfur amino acid synthesis                                                                                                                  |
| YPL093W         | NOG1          | 0.70                                   | 0.20                                                                | Putative GTPase that associates with free 60S ribosomal subunits in the nucleolus and is required for 60S ribosomal subunit biogenesis; constituent of 66S pre-ribosomal particles; member of the ODN family of nucleolar G-proteins            |
| YER150W         | SPI1          | 0.70                                   | 1.17                                                                | GPI-anchored cell wall protein involved in weak acid resistance; basal expression requires Msn2p/Msn4p; expression is induced under conditions of stress and during the diauxic shift; similar to Sed1p                                         |
| YDL008W         | APC11         | 0.70                                   | 0.26                                                                | Catalytic core subunit of the Anaphase-Promoting Complex/Cyclosome (APC/C), which is a ubiquitin-protein ligase required for degradation of anaphase inhibitors, including mitotic cyclins, during the metaphase/anaphase transition            |
| YGR103W         | NOP7          | 0.69                                   | 0.38                                                                | Component of several different pre-ribosomal particles; forms a complex with Ytm1p and Erb1p that is required for maturation of the large ribosomal subunit; required for exit from G0 and the initiation of cell proliferation                 |
| YPR016C         | TIF6          | 0.69                                   | 0.20                                                                | Constituent of 66S pre-ribosomal particles, has similarity to human translation initiation factor 6 (eIF6); may be involved in the biogenesis and or stability of 60S ribosomal subunits                                                        |
| YML093W         | UTP14         | 0.68                                   | 0.22                                                                | Subunit of U3-containing Small Subunit (SSU) processome complex involved in production of 18S rRNA and assembly of small ribosomal subunit                                                                                                      |
| YCR098C         | GIT1          | 0.67                                   | 0.84                                                                | Plasma membrane permease, mediates uptake of glycerophosphoinositol and glycerophosphocholine as sources of the nutrients inositol and phosphate; expression and transport rate are regulated by phosphate and inositol availability            |



**Supplemental Table S4: Genes differentially expressed in the *htbK123R* mutant and responsive to subsequent *SIR4* deletion**

| Systematic name | Standard Name | Log2 (Fold change <i>htbK123R/WT</i> ) | Log2 (Fold change <i>htbK123R<math>\Delta</math>sir4/htbK123R</i> ) | Gene Ontology Annotation                                                                                                                                                                                                                      |
|-----------------|---------------|----------------------------------------|---------------------------------------------------------------------|-----------------------------------------------------------------------------------------------------------------------------------------------------------------------------------------------------------------------------------------------|
| YMR229C         | RRP5          | 0.65                                   | 0.23                                                                | RNA binding protein with preference for single stranded tracts of U's involved in synthesis of both 18S and 5.8S rRNAs; component of both the ribosomal small subunit (SSU) processosome and the 90S preribosome                              |
| YLR276C         | DBP9          | 0.64                                   | 0.23                                                                | ATP-dependent RNA helicase of the DEAD-box family involved in biogenesis of the 60S ribosomal subunit                                                                                                                                         |
| YMR096W         | SNZ1          | 0.63                                   | 0.66                                                                | Protein involved in vitamin B6 biosynthesis; member of a stationary phase-induced gene family; coregulated with SNO1; interacts with Sno1p and with Yhr198p, perhaps as a multiprotein complex containing other Snz and Sno proteins          |
| YNL248C         | RPA49         | 0.63                                   | 0.47                                                                | RNA polymerase I subunit A49                                                                                                                                                                                                                  |
| YIR034C         | LYS1          | 0.62                                   | 1.64                                                                | Saccharopine dehydrogenase (NAD <sup>+</sup> , L-lysine-forming), catalyzes the conversion of saccharopine to L-lysine, which is the final step in the lysine biosynthesis pathway                                                            |
| YNL308C         | KRI1          | 0.62                                   | 0.42                                                                | Essential nucleolar protein required for 40S ribosome biogenesis; physically and functionally interacts with Krr1p                                                                                                                            |
| YHR170W         | NMD3          | 0.61                                   | 0.24                                                                | Protein involved in nuclear export of the large ribosomal subunit; acts as a Crm1p-dependent adapter protein for export of nascent ribosomal subunits through the nuclear pore complex                                                        |
| YHR197W         | RIX1          | 0.60                                   | 0.36                                                                | Essential component of the Rix1 complex (Rix1p, Ipi1p, Ipi3p) that is required for processing of ITS2 sequences from 35S pre-rRNA; Rix1 complex associates with Mdn1p in pre-60S ribosomal particles                                          |
| YOR341W         | RPA190        | 0.60                                   | 0.18                                                                | RNA polymerase I largest subunit A190                                                                                                                                                                                                         |
| YOR202W         | HIS3          | 0.58                                   | 0.39                                                                | Imidazoleglycerol-phosphate dehydratase, catalyzes the sixth step in histidine biosynthesis; mutations cause histidine auxotrophy and sensitivity to Cu, Co, and Ni salts; transcription is regulated by general amino acid control via Gcn4p |
| YBR256C         | RIB5          | 0.58                                   | 0.56                                                                | Riboflavin synthase; catalyzes the last step of the riboflavin biosynthesis pathway                                                                                                                                                           |

**Supplemental Table S4: Genes differentially expressed in the *htbK123R* mutant and responsive to subsequent *SIR4* deletion**

| Systematic name | Standard Name | Log2 (Fold change <i>htbK123R/WT</i> ) | Log2 (Fold change <i>htbK123R<math>\Delta</math>sir4/htbK123R</i> ) | Gene Ontology Annotation                                                                                                                                                                                                                              |
|-----------------|---------------|----------------------------------------|---------------------------------------------------------------------|-------------------------------------------------------------------------------------------------------------------------------------------------------------------------------------------------------------------------------------------------------|
| YNL277W         | MET2          | 0.57                                   | 0.52                                                                | L-homoserine-O-acetyltransferase, catalyzes the conversion of homoserine to O-acetyl homoserine which is the first step of the methionine biosynthetic pathway                                                                                        |
| YDL167C         | NRP1          | 0.57                                   | 0.33                                                                | Putative RNA binding protein of unknown function; localizes to stress granules induced by glucose deprivation; predicted to be involved in ribosome biogenesis                                                                                        |
| YDR500C         | RPL37B        | 0.56                                   | 0.26                                                                | Protein component of the large (60S) ribosomal subunit, has similarity to Rpl37Ap and to rat L37 ribosomal protein                                                                                                                                    |
| YJL136C         | RPS21B        | 0.56                                   | 0.17                                                                | Protein component of the small (40S) ribosomal subunit; nearly identical to Rps21Ap and has similarity to rat S21 ribosomal protein                                                                                                                   |
| YDL048C         | STP4          | 0.56                                   | 0.68                                                                | Protein containing a Kruppel-type zinc-finger domain; has similarity to Stp1p, Stp2p, and Stp3p                                                                                                                                                       |
| YAL036C         | RBG1          | 0.56                                   | 0.26                                                                | Member of the DRG family of GTP-binding proteins; associates with translating ribosomes; interacts with Tma46p, Ygr250cp, Gir2p and Yap1p via two-hybrid                                                                                              |
| YKL009W         | MRT4          | 0.55                                   | 0.30                                                                | Protein involved in mRNA turnover and ribosome assembly, localizes to the nucleolus                                                                                                                                                                   |
| YLR409C         | UTP21         | 0.55                                   | 0.36                                                                | Subunit of U3-containing 90S preribosome and Small Subunit (SSU) processome complexes involved in production of 18S rRNA and assembly of small ribosomal subunit; synthetic defect with STI1 Hsp90 cochaperone; human homolog linked to glaucoma      |
| YJR137C         | MET5          | 0.54                                   | 0.44                                                                | Sulfite reductase beta subunit, involved in amino acid biosynthesis, transcription repressed by methionine                                                                                                                                            |
| YPR144C         | NOC4          | 0.54                                   | 0.42                                                                | Nucleolar protein, forms a complex with Nop14p that mediates maturation and nuclear export of 40S ribosomal subunits                                                                                                                                  |
| YEL033W         | MTC7          | 0.54                                   | 0.44                                                                | Predicted metabolic role based on network analysis derived from ChIP experiments, a large-scale deletion study and localization of transcription factor binding sites; null mutant is sensitive to temperature oscillation in a <i>cdc13-1</i> mutant |

**Supplemental Table S4: Genes differentially expressed in the *htbK123R* mutant and responsive to subsequent *SIR4* deletion**

| Systematic name | Standard Name | Log2 (Fold change <i>htbK123R/WT</i> ) | Log2 (Fold change <i>htbK123R<math>\Delta</math>sir4/<br/>htbK123R</i> ) | Gene Ontology Annotation                                                                                                                                                                                                                        |
|-----------------|---------------|----------------------------------------|--------------------------------------------------------------------------|-------------------------------------------------------------------------------------------------------------------------------------------------------------------------------------------------------------------------------------------------|
| YKL099C         | UTP11         | 0.54                                   | 0.40                                                                     | Subunit of U3-containing Small Subunit (SSU) processome complex involved in production of 18S rRNA and assembly of small ribosomal subunit                                                                                                      |
| YEL054C         | RPL12A        | 0.54                                   | 0.37                                                                     | Protein component of the large (60S) ribosomal subunit, nearly identical to Rpl12Bp; rpl12a rpl12b double mutant exhibits slow growth and slow translation; has similarity to E. coli L11 and rat L12 ribosomal proteins                        |
| YDR496C         | PUF6          | 0.53                                   | 0.39                                                                     | Pumilio-homology domain protein that binds the 3' UTR of ASH1 mRNA and represses its translation, resulting in proper asymmetric localization of ASH1 mRNA; also co-sediments with the 60S ribosomal subunit and is required for its biogenesis |
| YPL086C         | ELP3          | 0.52                                   | 0.36                                                                     | Subunit of Elongator complex, which is required for modification of wobble nucleosides in tRNA; exhibits histone acetyltransferase activity that is directed to histones H3 and H4; disruption confers resistance to K. lactis zymotoxin        |
| YDL031W         | DBP10         | 0.52                                   | 0.32                                                                     | Putative ATP-dependent RNA helicase of the DEAD-box protein family, constituent of 66S pre-ribosomal particles; essential protein involved in ribosome biogenesis                                                                               |
| YGL055W         | OLE1          | 0.51                                   | 0.45                                                                     | Delta(9) fatty acid desaturase, required for monounsaturated fatty acid synthesis and for normal distribution of mitochondria                                                                                                                   |
| YNL112W         | DBP2          | 0.49                                   | 0.20                                                                     | Essential ATP-dependent RNA helicase of the DEAD-box protein family, involved in nonsense-mediated mRNA decay and rRNA processing                                                                                                               |
| YCL054W         | SPB1          | 0.48                                   | 0.28                                                                     | AdoMet-dependent methyltransferase involved in rRNA processing and 60S ribosomal subunit maturation; methylates G2922 in the tRNA docking site of the large subunit rRNA and in the absence of snR52, U2921; suppressor of PAB1 mutants         |
| YDR465C         | RMT2          | 0.48                                   | 0.43                                                                     | Arginine N5 methyltransferase; methylates ribosomal protein Rpl12 (L12) on Arg67                                                                                                                                                                |
| YCL059C         | KRR1          | 0.48                                   | 0.38                                                                     | Essential nucleolar protein required for the synthesis of 18S rRNA and for the assembly of 40S ribosomal subunit                                                                                                                                |

**Supplemental Table S4: Genes differentially expressed in the *htbK123R* mutant and responsive to subsequent *SIR4* deletion**

| Systematic name | Standard Name | Log2 (Fold change <i>htbK123R/WT</i> ) | Log2 (Fold change <i>htbK123R<math>\Delta</math>sir4/<i>htbK123R</i></i> ) | Gene Ontology Annotation                                                                                                                                                                                                                |
|-----------------|---------------|----------------------------------------|----------------------------------------------------------------------------|-----------------------------------------------------------------------------------------------------------------------------------------------------------------------------------------------------------------------------------------|
| YJL151C         | SNA3          | 0.47                                   | 0.30                                                                       | Integral membrane protein localized to vacuolar intraluminal vesicles, computational analysis of large-scale protein-protein interaction data suggests a possible role in either cell wall synthesis or protein-vacuolar targeting      |
| YDL153C         | SAS10         | 0.46                                   | 0.27                                                                       | Essential subunit of U3-containing Small Subunit (SSU) processome complex involved in production of 18S rRNA and assembly of small ribosomal subunit; disrupts silencing when overproduced                                              |
| YDL166C         | FAP7          | 0.46                                   | 0.34                                                                       | Essential NTPase required for small ribosome subunit synthesis, mediates processing of the 20S pre-rRNA at site D in the cytoplasm but associates only transiently with 43S preribosomes via Rps14p, may be the endonuclease for site D |
| YOR303W         | CPA1          | 0.45                                   | 0.30                                                                       | Small subunit of carbamoyl phosphate synthetase, which catalyzes a step in the synthesis of citrulline, an arginine precursor; translationally regulated by an attenuator peptide encoded by YOR302W within the CPA1 mRNA 5'-leader     |
| YLR194C         |               | 0.45                                   | 0.39                                                                       | Structural constituent of the cell wall attached to the plasma membrane by a GPI-anchor; expression is upregulated in response to cell wall stress                                                                                      |
| YOL077C         | BRX1          | 0.44                                   | 0.40                                                                       | Nucleolar protein, constituent of 66S pre-ribosomal particles; depletion leads to defects in rRNA processing and a block in the assembly of large ribosomal subunits; possesses a sigma (70)-like RNA-binding motif                     |
| YDR120C         | TRM1          | 0.43                                   | 0.31                                                                       | tRNA methyltransferase; two forms of the protein are made by alternative translation starts; localizes to both the nucleus and mitochondrion to produce the modified base N2,N2-dimethylguanosine in tRNAs in both compartments         |
| YLR197W         | NOP56         | 0.42                                   | 0.33                                                                       | Essential evolutionarily-conserved nucleolar protein component of the box C/D snoRNP complexes that direct 2'-O-methylation of pre-rRNA during its maturation; overexpression causes spindle orientation defects                        |

**Supplemental Table S4: Genes differentially expressed in the *htbK123R* mutant and responsive to subsequent *SIR4* deletion**

| Systematic name | Standard Name | Log2 (Fold change <i>htbK123R/WT</i> ) | Log2 (Fold change <i>htbK123R<math>\Delta</math>sir4/htbK123R</i> ) | Gene Ontology Annotation                                                                                                                                                                                                                                |
|-----------------|---------------|----------------------------------------|---------------------------------------------------------------------|---------------------------------------------------------------------------------------------------------------------------------------------------------------------------------------------------------------------------------------------------------|
| YLL034C         | RIX7          | 0.42                                   | 0.31                                                                | Putative ATPase of the AAA family, required for export of pre-ribosomal large subunits from the nucleus; distributed between the nucleolus, nucleoplasm, and nuclear periphery depending on growth conditions                                           |
| YCL036W         | GFD2          | 0.41                                   | 0.25                                                                | Protein of unknown function, identified as a high-copy suppressor of a <i>dbp5</i> mutation                                                                                                                                                             |
| YLL045C         | RPL8B         | 0.40                                   | 0.28                                                                | Ribosomal protein L4 of the large (60S) ribosomal subunit, nearly identical to Rpl8Ap and has similarity to rat L7a ribosomal protein; mutation results in decreased amounts of free 60S subunits                                                       |
| YGR175C         | ERG1          | 0.40                                   | 0.16                                                                | Squalene epoxidase, catalyzes the epoxidation of squalene to 2,3-oxidosqualene; plays an essential role in the ergosterol-biosynthesis pathway and is the specific target of the antifungal drug terbinafine                                            |
| YKL014C         | URB1          | 0.39                                   | 0.31                                                                | Nucleolar protein required for the normal accumulation of 25S and 5.8S rRNAs, associated with the 27SA2 pre-ribosomal particle; proposed to be involved in the biogenesis of the 60S ribosomal subunit                                                  |
| YNL182C         | IPI3          | 0.39                                   | 0.29                                                                | Essential component of the Rix1 complex (Rix1p, Ipi1p, Ipi3p) that is required for processing of ITS2 sequences from 35S pre-rRNA; highly conserved and contains WD40 motifs; Rix1 complex associates with Mdn1p in pre-60S ribosomal particles         |
| YLR447C         | VMA6          | 0.37                                   | 0.19                                                                | Subunit d of the five-subunit V0 integral membrane domain of vacuolar H <sup>+</sup> -ATPase (V-ATPase), an electrogenic proton pump found in the endomembrane system; stabilizes V0 subunits; required for V1 domain assembly on the vacuolar membrane |
| YHR146W         | CRP1          | 0.37                                   | 0.47                                                                | Protein that binds to cruciform DNA structures                                                                                                                                                                                                          |
| YMR217W         | GUA1          | 0.36                                   | 0.44                                                                | GMP synthase, an enzyme that catalyzes the second step in the biosynthesis of GMP from inosine 5'-phosphate (IMP); transcription is not subject to regulation by guanine but is negatively regulated by nutrient starvation                             |

**Supplemental Table S4: Genes differentially expressed in the *htbK123R* mutant and responsive to subsequent *SIR4* deletion**

| Systematic name | Standard Name | Log2 (Fold change <i>htbK123R/WT</i> ) | Log2 (Fold change <i>htbK123R<math>\Delta</math>sir4/htbK123R</i> ) | Gene Ontology Annotation                                                                                                                                                                                                                  |
|-----------------|---------------|----------------------------------------|---------------------------------------------------------------------|-------------------------------------------------------------------------------------------------------------------------------------------------------------------------------------------------------------------------------------------|
| YPL019C         | VTC3          | 0.36                                   | 0.36                                                                | Subunit of the vacuolar transporter chaperone (VTC) complex involved in membrane trafficking, vacuolar polyphosphate accumulation, microautophagy and non-autophagic vacuolar fusion                                                      |
| YLR106C         | MDN1          | 0.34                                   | 0.18                                                                | Huge dynein-related AAA-type ATPase (midasin), forms extended pre-60S particle with the Rix1 complex (Rix1p-Ipi1p-Ipi3p); acts in removal of ribosomal biogenesis factors at successive steps of pre-60S assembly and export from nucleus |
| YPL090C         | RPS6A         | 0.34                                   | 0.16                                                                | Protein component of the small (40S) ribosomal subunit; identical to Rps6Bp and has similarity to rat S6 ribosomal protein                                                                                                                |
| YLR344W         | RPL26A        | 0.33                                   | 0.47                                                                | Protein component of the large (60S) ribosomal subunit, nearly identical to Rpl26Bp and has similarity to E. coli L24 and rat L26 ribosomal proteins; binds to 5.8S rRNA                                                                  |
| YLR222C         | UTP13         | 0.32                                   | 0.40                                                                | Nucleolar protein, component of the small subunit (SSU) processome containing the U3 snoRNA that is involved in processing of pre-18S rRNA                                                                                                |
| YBL004W         | UTP20         | 0.31                                   | 0.43                                                                | Component of the small-subunit (SSU) processome, which is involved in the biogenesis of the 18S rRNA                                                                                                                                      |
| YCR031C         | RPS14A        | 0.31                                   | 0.25                                                                | Ribosomal protein 59 of the small subunit, required for ribosome assembly and 20S pre-rRNA processing; mutations confer cryptopleurine resistance; nearly identical to Rps14Bp and similar to E. coli S11 and rat S14 ribosomal proteins  |
| YPR163C         | TIF3          | 0.31                                   | 0.20                                                                | Translation initiation factor eIF-4B, has RNA annealing activity; contains an RNA recognition motif and binds to single-stranded RNA                                                                                                      |
| YJL200C         | ACO2          | 0.31                                   | 0.48                                                                | Putative mitochondrial aconitase isozyme; similarity to Aco1p, an aconitase required for the TCA cycle; expression induced during growth on glucose, by amino acid starvation via Gcn4p, and repressed on ethanol                         |
| YMR242C         | RPL20A        | 0.30                                   | 0.25                                                                | Protein component of the large (60S) ribosomal subunit, nearly identical to Rpl20Bp and has similarity to rat L18a ribosomal protein                                                                                                      |

**Supplemental Table S4: Genes differentially expressed in the *htbK123R* mutant and responsive to subsequent *SIR4* deletion**

| Systematic name | Standard Name | Log2 (Fold change <i>htbK123R/WT</i> ) | Log2 (Fold change <i>htbK123R<math>\Delta</math>sir4/<i>htbK123R</i></i> ) | Gene Ontology Annotation                                                                                                                                                                                                                  |
|-----------------|---------------|----------------------------------------|----------------------------------------------------------------------------|-------------------------------------------------------------------------------------------------------------------------------------------------------------------------------------------------------------------------------------------|
| YBR011C         | IPP1          | 0.29                                   | 0.33                                                                       | Cytoplasmic inorganic pyrophosphatase (PPase), homodimer that catalyzes the rapid exchange of oxygens from Pi with water, highly expressed and essential for viability, active-site residues show identity to those from E. coli PPase    |
| YJL050W         | MTR4          | 0.28                                   | 0.22                                                                       | ATP-dependent 3'-5' RNA helicase of the Dead-box family, involved in nuclear RNA processing and degradation both as a component of the TRAMP complex and in TRAMP independent processes; has a KOW domain that shows RNA binding activity |
| YOR310C         | NOP58         | 0.27                                   | 0.17                                                                       | Protein involved in pre-rRNA processing, 18S rRNA synthesis, and snoRNA synthesis; component of the small subunit processome complex, which is required for processing of pre-18S rRNA                                                    |
| YKL172W         | EBP2          | 0.27                                   | 0.26                                                                       | Essential protein required for the maturation of 25S rRNA and 60S ribosomal subunit assembly, localizes to the nucleolus; constituent of 66S pre-ribosomal particles                                                                      |
| YGR286C         | BIO2          | 0.26                                   | 0.54                                                                       | Biotin synthase, catalyzes the conversion of dethiobiotin to biotin, which is the last step of the biotin biosynthesis pathway; complements E. coli bioB mutant                                                                           |
| YJL174W         | KRE9          | 0.25                                   | 0.27                                                                       | Glycoprotein involved in cell wall beta-glucan assembly; null mutation leads to severe growth defects, aberrant multibudded morphology, and mating defects                                                                                |
| YIL075C         | RPN2          | 0.25                                   | 0.31                                                                       | Subunit of the 26S proteasome, substrate of the N-acetyltransferase Nat1p                                                                                                                                                                 |
| YDL082W         | RPL13A        | 0.24                                   | 0.29                                                                       | Protein component of the large (60S) ribosomal subunit, nearly identical to Rpl13Bp; not essential for viability; has similarity to rat L13 ribosomal protein                                                                             |
| YNL247W         |               | 0.24                                   | 0.25                                                                       | CysteinyI-tRNA synthetase; may interact with ribosomes, based on co-purification experiments                                                                                                                                              |
| YBR189W         | RPS9B         | 0.23                                   | 0.15                                                                       | Protein component of the small (40S) ribosomal subunit; nearly identical to Rps9Ap and has similarity to E. coli S4 and rat S9 ribosomal proteins                                                                                         |

**Supplemental Table S4: Genes differentially expressed in the *htbK123R* mutant and responsive to subsequent *SIR4* deletion**

| Systematic name | Standard Name | Log2 (Fold change <i>htbK123R/WT</i> ) | Log2 (Fold change <i>htbK123R<math>\Delta</math>sir4/htbK123R</i> ) | Gene Ontology Annotation                                                                                                                                                                                                             |
|-----------------|---------------|----------------------------------------|---------------------------------------------------------------------|--------------------------------------------------------------------------------------------------------------------------------------------------------------------------------------------------------------------------------------|
| YFL038C         | YPT1          | 0.22                                   | 0.21                                                                | Rab family GTPase, involved in the ER-to-Golgi step of the secretory pathway; complex formation with the Rab escort protein Mrs6p is required for prenylation of Ypt1p by protein geranylgeranyltransferase type II (Bet2p-Bet4p)    |
| YIL052C         | RPL34B        | 0.22                                   | 0.20                                                                | Protein component of the large (60S) ribosomal subunit, nearly identical to Rpl34Ap and has similarity to rat L34 ribosomal protein                                                                                                  |
| YMR308C         | PSE1          | 0.21                                   | 0.31                                                                | Karyopherin/importin that interacts with the nuclear pore complex; acts as the nuclear import receptor for specific proteins, including Pdr1p, Yap1p, Ste12p, and Aft1p                                                              |
| YGL189C         | RPS26A        | 0.21                                   | 0.30                                                                | Protein component of the small (40S) ribosomal subunit; nearly identical to Rps26Bp and has similarity to rat S26 ribosomal protein                                                                                                  |
| YHR021C         | RPS27B        | 0.21                                   | 0.27                                                                | Protein component of the small (40S) ribosomal subunit; nearly identical to Rps27Ap and has similarity to rat S27 ribosomal protein                                                                                                  |
| YJL008C         | CCT8          | 0.20                                   | 0.25                                                                | Subunit of the cytosolic chaperonin Cct ring complex, related to Tcp1p, required for the assembly of actin and tubulins in vivo                                                                                                      |
| YEL027W         | CUP5          | 0.19                                   | 0.23                                                                | Proteolipid subunit of the vacuolar H(+)-ATPase V0 sector (subunit c; dicyclohexylcarbodiimide binding subunit); required for vacuolar acidification and important for copper and iron metal ion homeostasis                         |
| YHR190W         | ERG9          | 0.19                                   | 0.23                                                                | Farnesyl-diphosphate farnesyl transferase (squalene synthase), joins two farnesyl pyrophosphate moieties to form squalene in the sterol biosynthesis pathway                                                                         |
| YOL059W         | GPD2          | 0.19                                   | 0.19                                                                | NAD-dependent glycerol 3-phosphate dehydrogenase, homolog of Gpd1p, expression is controlled by an oxygen-independent signaling pathway required to regulate metabolism under anoxic conditions; located in cytosol and mitochondria |
| YML028W         | TSA1          | 0.18                                   | 0.24                                                                | Thioredoxin peroxidase, acts as both a ribosome-associated and free cytoplasmic antioxidant; self-associates to form a high-molecular weight chaperone complex under oxidative stress; deletion results in mutator phenotype         |



**Supplemental Table S4: Genes differentially expressed in the *htbK123R* mutant and responsive to subsequent *SIR4* deletion**

| Systematic name | Standard Name | Log2 (Fold change <i>htbK123R/WT</i> ) | Log2 (Fold change <i>htbK123R<math>\Delta</math>sir4/htbK123R</i> ) | Gene Ontology Annotation                                                                                                                                                                                                             |
|-----------------|---------------|----------------------------------------|---------------------------------------------------------------------|--------------------------------------------------------------------------------------------------------------------------------------------------------------------------------------------------------------------------------------|
| YBL092W         | RPL32         | 0.18                                   | 0.19                                                                | Protein component of the large (60S) ribosomal subunit, has similarity to rat L32 ribosomal protein; overexpression disrupts telomeric silencing                                                                                     |
| YER131W         | RPS26B        | 0.18                                   | 0.18                                                                | Protein component of the small (40S) ribosomal subunit; nearly identical to Rps26Ap and has similarity to rat S26 ribosomal protein                                                                                                  |
| YML056C         | IMD4          | 0.16                                   | 0.37                                                                | Inosine monophosphate dehydrogenase, catalyzes the first step of GMP biosynthesis, member of a four-gene family in <i>S. cerevisiae</i> , constitutively expressed                                                                   |
| YML063W         | RPS1B         | 0.12                                   | 0.29                                                                | Ribosomal protein 10 (rp10) of the small (40S) subunit; nearly identical to Rps1Ap and has similarity to rat S3a ribosomal protein                                                                                                   |
| YLL053C         |               | 1.97                                   | -0.70                                                               | Putative protein; in the Sigma 1278B strain background YLL053C is contiguous with AQY2 which encodes an aquaporin                                                                                                                    |
| YCL030C         | HIS4          | 1.53                                   | -0.37                                                               | Multifunctional enzyme containing phosphoribosyl-ATP pyrophosphatase, phosphoribosyl-AMP cyclohydrolase, and histidinol dehydrogenase activities; catalyzes the second, third, ninth and tenth steps in histidine biosynthesis       |
| YDR534C         | FIT1          | 1.47                                   | -1.00                                                               | Mannoprotein that is incorporated into the cell wall via a glycosylphosphatidylinositol (GPI) anchor, involved in the retention of siderophore-iron in the cell wall                                                                 |
| YFL011W         | HXT10         | 1.38                                   | -1.21                                                               | Putative hexose transporter, expressed at low levels and expression is repressed by glucose                                                                                                                                          |
| YLR437C         | DIF1          | 1.24                                   | -0.39                                                               | Protein that regulates the nuclear localization of ribonucleotide reductase Rnr2p and Rnr4p subunits; phosphorylated by Dun1p in response to DNA damage and degraded; N-terminal half has similarity to <i>S. pombe</i> Spd1 protein |
| YPR195C         |               | 1.22                                   | -0.89                                                               | Dubious open reading frame unlikely to encode a protein, based on available experimental and comparative sequence data                                                                                                               |
| YCL033C         | MXR2          | 1.19                                   | -0.29                                                               | Methionine-R-sulfoxide reductase, involved in the response to oxidative stress; protects iron-sulfur clusters from oxidative inactivation along with MXR1; involved in the regulation of lifespan                                    |

**Supplemental Table S4: Genes differentially expressed in the *htbK123R* mutant and responsive to subsequent *SIR4* deletion**

| Systematic name | Standard Name | Log2 (Fold change <i>htbK123R/WT</i> ) | Log2 (Fold change <i>htbK123R<math>\Delta</math>sir4/htbK123R</i> ) | Gene Ontology Annotation                                                                                                                                                                                                                   |
|-----------------|---------------|----------------------------------------|---------------------------------------------------------------------|--------------------------------------------------------------------------------------------------------------------------------------------------------------------------------------------------------------------------------------------|
| YMR011W         | HXT2          | 1.17                                   | -0.74                                                               | High-affinity glucose transporter of the major facilitator superfamily, expression is induced by low levels of glucose and repressed by high levels of glucose                                                                             |
| YDL218W         |               | 1.17                                   | -0.57                                                               | Putative protein of unknown function; YDL218W transcription is regulated by Azf1p and induced by starvation and aerobic conditions; expression also induced in cells treated with the mycotoxin patulin                                    |
| YGR032W         | GSC2          | 1.14                                   | -0.95                                                               | Catalytic subunit of 1,3-beta-glucan synthase, involved in formation of the inner layer of the spore wall; activity positively regulated by Rho1p and negatively by Smk1p; has similarity to an alternate catalytic subunit, Fks1p (Gsc1p) |
| YDR524C-B       |               | 1.14                                   | -0.67                                                               | Putative protein of unknown function                                                                                                                                                                                                       |
| YKL216W         | URA1          | 1.12                                   | -0.50                                                               | Dihydroorotate dehydrogenase, catalyzes the fourth enzymatic step in the de novo biosynthesis of pyrimidines, converting dihydroorotic acid into orotic acid                                                                               |
| YGL126W         | SCS3          | 1.12                                   | -0.43                                                               | Protein required for inositol prototrophy, identified as an ortholog of the FIT family of proteins involved in triglyceride droplet biosynthesis; disputed role in the synthesis of inositol phospholipids from inositol                   |
| YPL223C         | GRE1          | 1.09                                   | -0.80                                                               | Hydrophilin of unknown function; stress induced (osmotic, ionic, oxidative, heat shock and heavy metals); regulated by the HOG pathway                                                                                                     |
| YAR050W         | FLO1          | 1.07                                   | -0.57                                                               | Lectin-like protein involved in flocculation, cell wall protein that binds to mannose chains on the surface of other cells, confers floc-forming ability that is chymotrypsin sensitive and heat resistant; similar to Flo5p               |
| YLR374C         |               | 1.06                                   | -0.75                                                               | Dubious open reading frame unlikely to encode a protein, based on available experimental and comparative sequence data; partially overlaps the uncharacterized ORF STP3/YLR375W                                                            |
| YCL027W         | FUS1          | 1.06                                   | -1.29                                                               | Membrane protein localized to the shmoo tip, required for cell fusion; expression regulated by mating pheromone; proposed to coordinate signaling, fusion, and polarization events required for fusion; potential Cdc28p substrate         |

**Supplemental Table S4: Genes differentially expressed in the *htbK123R* mutant and responsive to subsequent *SIR4* deletion**

| Systematic name | Standard Name | Log2 (Fold change <i>htbK123R/WT</i> ) | Log2 (Fold change <i>htbK123R<math>\Delta</math>sir4/htbK123R</i> ) | Gene Ontology Annotation                                                                                                                                                                                                                     |
|-----------------|---------------|----------------------------------------|---------------------------------------------------------------------|----------------------------------------------------------------------------------------------------------------------------------------------------------------------------------------------------------------------------------------------|
| YNR065C         |               | 1.05                                   | -0.53                                                               | Protein of unknown function; protein-protein interactions suggest a possible role in actin patch formation; YNR065C is not an essential gene                                                                                                 |
| YCR047C         | BUD23         | 0.95                                   | -0.27                                                               | Methyltransferase, methylates residue G1575 of 18S rRNA; required for rRNA processing and nuclear export of 40S ribosomal subunits independently of methylation activity; diploid mutant displays random budding pattern                     |
| YNR066C         |               | 0.93                                   | -1.24                                                               | Putative membrane-localized protein of unknown function                                                                                                                                                                                      |
| YBL081W         |               | 0.90                                   | -0.44                                                               | Non-essential protein of unknown function; null mutation results in a decrease in plasma membrane electron transport                                                                                                                         |
| YER153C         | PET122        | 0.90                                   | -0.84                                                               | Mitochondrial translational activator specific for the COX3 mRNA, acts together with Pet54p and Pet494p; located in the mitochondrial inner membrane                                                                                         |
| YJR114W         |               | 0.90                                   | -0.62                                                               | Dubious open reading frame unlikely to encode a protein, based on available experimental and comparative sequence data; partially overlaps the verified ORF RSM7/YJR113C                                                                     |
| YER018C         | SPC25         | 0.89                                   | -0.94                                                               | Component of the evolutionarily conserved kinetochore-associated Ndc80 complex (Ndc80p-Nuf2p-Spc24p-Spc25p); involved in chromosome segregation, spindle checkpoint activity and kinetochore clustering                                      |
| YLR420W         | URA4          | 0.77                                   | -0.40                                                               | Dihydroorotase, catalyzes the third enzymatic step in the de novo biosynthesis of pyrimidines, converting carbamoyl-L-aspartate into dihydroorotate                                                                                          |
| YML113W         | DAT1          | 0.77                                   | -0.50                                                               | DNA binding protein that recognizes oligo (dA).oligo(dT) tracts; Arg side chain in its N-terminal pentad Gly-Arg-Lys-Pro-Gly repeat is required for DNA-binding; not essential for viability                                                 |
| YIR019C         | MUC1          | 0.76                                   | -0.55                                                               | GPI-anchored cell surface glycoprotein (flocculin) required for pseudohyphal formation, invasive growth, flocculation, and biofilms; transcriptionally regulated by the MAPK pathway (via Ste12p and Tec1p) and the cAMP pathway (via Flo8p) |

**Supplemental Table S4: Genes differentially expressed in the *htbK123R* mutant and responsive to subsequent *SIR4* deletion**

| Systematic name | Standard Name | Log2 (Fold change <i>htbK123R/WT</i> ) | Log2 (Fold change <i>htbK123R<math>\Delta</math>sir4/htbK123R</i> ) | Gene Ontology Annotation                                                                                                                                                                                                           |
|-----------------|---------------|----------------------------------------|---------------------------------------------------------------------|------------------------------------------------------------------------------------------------------------------------------------------------------------------------------------------------------------------------------------|
| YNR046W         | TRM112        | 0.75                                   | -0.35                                                               | Subunit of tRNA methyltransferase (MTase) complexes in combination with Trm9p and Trm11p; subunit of complex with Mtq2p that methylates Sup45p (eRF1) in the ternary complex eRF1-eRF3-GTP; deletion confers resistance to zymocin |
| YGL255W         | ZRT1          | 0.75                                   | -0.52                                                               | High-affinity zinc transporter of the plasma membrane, responsible for the majority of zinc uptake; transcription is induced under low-zinc conditions by the Zap1p transcription factor                                           |
| YER040W         | GLN3          | 0.74                                   | -0.73                                                               | Transcriptional activator of genes regulated by nitrogen catabolite repression (NCR), localization and activity regulated by quality of nitrogen source                                                                            |
| YAL020C         | ATS1          | 0.74                                   | -0.46                                                               | Protein required, with Elongator complex, Kti11p, and Kti12p, for modification of wobble nucleosides in tRNA; has a potential role in regulatory interactions between microtubules and the cell cycle                              |
| YDL160C         | DHH1          | 0.74                                   | -0.33                                                               | Cytoplasmic DExD/H-box helicase, stimulates mRNA decapping, coordinates distinct steps in mRNA function and decay, interacts with both the decapping and deadenylase complexes, may have a role in mRNA export and translation     |
| YCR051W         |               | 0.74                                   | -0.76                                                               | Putative protein of unknown function; green fluorescent protein (GFP)-fusion protein localizes to the cytoplasm and nucleus; contains ankyrin (Ank) repeats; YCR051W is not an essential gene                                      |
| YGL026C         | TRP5          | 0.73                                   | -0.28                                                               | Tryptophan synthase, catalyzes the last step of tryptophan biosynthesis; regulated by the general control system of amino acid biosynthesis                                                                                        |
| YCR048W         | ARE1          | 0.72                                   | -0.28                                                               | Acyl-CoA:sterol acyltransferase, isozyme of Are2p; endoplasmic reticulum enzyme that contributes the major sterol esterification activity in the absence of oxygen                                                                 |
| YFR034C         | PHO4          | 0.72                                   | -0.55                                                               | Basic helix-loop-helix (bHLH) transcription factor of the myc-family; binds cooperatively with Pho2p to the PHO5 promoter; function is regulated by phosphorylation at multiple sites and by phosphate availability                |

**Supplemental Table S4: Genes differentially expressed in the *htbK123R* mutant and responsive to subsequent *SIR4* deletion**

| Systematic name | Standard Name | Log2 (Fold change <i>htbK123R/WT</i> ) | Log2 (Fold change <i>htbK123R<math>\Delta</math>sir4/htbK123R</i> ) | Gene Ontology Annotation                                                                                                                                                                                                                                                 |
|-----------------|---------------|----------------------------------------|---------------------------------------------------------------------|--------------------------------------------------------------------------------------------------------------------------------------------------------------------------------------------------------------------------------------------------------------------------|
| YBR067C         | TIP1          | 0.72                                   | -0.75                                                               | Major cell wall mannoprotein with possible lipase activity; transcription is induced by heat- and cold-shock; member of the Srp1p/Tip1p family of serine-alanine-rich proteins                                                                                           |
| YMR245W         |               | 0.71                                   | -0.61                                                               | Dubious open reading frame unlikely to encode a functional protein, based on available experimental and comparative sequence data                                                                                                                                        |
| YBR048W         | RPS11B        | 0.71                                   | -0.25                                                               | Protein component of the small (40S) ribosomal subunit; identical to Rps11Ap and has similarity to E. coli S17 and rat S11 ribosomal proteins                                                                                                                            |
| YBR289W         | SNF5          | 0.71                                   | -0.75                                                               | Subunit of the SWI/SNF chromatin remodeling complex involved in transcriptional regulation; functions interdependently in transcriptional activation with Snf2p and Snf6p                                                                                                |
| YLR449W         | FPR4          | 0.70                                   | -0.59                                                               | Peptidyl-prolyl cis-trans isomerase (PPIase) (proline isomerase) localized to the nucleus; catalyzes isomerization of proline residues in histones H3 and H4, which affects lysine methylation of those histones                                                         |
| YML102W         | CAC2          | 0.70                                   | -0.51                                                               | Component of the chromatin assembly complex (with Rlf2p and Msi1p) that assembles newly synthesized histones onto recently replicated DNA, required for building functional kinetochores, conserved from yeast to humans                                                 |
| YHR211W         | FLO5          | 0.69                                   | -0.45                                                               | Lectin-like cell wall protein (flocculin) involved in flocculation, binds to mannose chains on the surface of other cells, confers floc-forming ability that is chymotrypsin resistant but heat labile; similar to Flo1p                                                 |
| YBR016W         |               | 0.69                                   | -0.39                                                               | Plasma membrane protein of unknown function, predicted to be palmitoylated; has similarity to hydrophilins, which are hydrophilic, glycine-rich proteins involved in the adaptive response to hyperosmotic conditions                                                    |
| YDR297W         | SUR2          | 0.68                                   | -0.64                                                               | Sphinganine C4-hydroxylase, catalyses the conversion of sphinganine to phytosphingosine in sphingolipid biosynthesis                                                                                                                                                     |
| YFL010C         | WWM1          | 0.66                                   | -1.11                                                               | WW domain containing protein of unknown function; binds to Mca1p, a caspase-related protease that regulates H <sub>2</sub> O <sub>2</sub> -induced apoptosis; overexpression causes G1 phase growth arrest and clonal death that is suppressed by overexpression of MCA1 |

**Supplemental Table S4: Genes differentially expressed in the *htbK123R* mutant and responsive to subsequent *SIR4* deletion**

| Systematic name | Standard Name | Log2 (Fold change <i>htbK123R/WT</i> ) | Log2 (Fold change <i>htbK123R<math>\Delta</math>sir4/htbK123R</i> ) | Gene Ontology Annotation                                                                                                                                                                                                                      |
|-----------------|---------------|----------------------------------------|---------------------------------------------------------------------|-----------------------------------------------------------------------------------------------------------------------------------------------------------------------------------------------------------------------------------------------|
| YGL198W         | YIP4          | 0.65                                   | -0.69                                                               | Protein that interacts with Rab GTPases, localized to late Golgi vesicles; computational analysis of large-scale protein-protein interaction data suggests a possible role in vesicle-mediated transport                                      |
| YOR188W         | MSB1          | 0.65                                   | -0.87                                                               | Protein involved in positive regulation of both 1,3-beta-glucan synthesis and the Pkc1p-MAPK pathway, potential Cdc28p substrate; multicopy suppressor of temperature-sensitive mutations in CDC24 and CDC42, and of mutations in BEM4        |
| YNL322C         | KRE1          | 0.65                                   | -0.26                                                               | Cell wall glycoprotein involved in beta-glucan assembly; serves as a K1 killer toxin membrane receptor                                                                                                                                        |
| YLR114C         | AVL9          | 0.64                                   | -0.53                                                               | Conserved protein involved in exocytic transport from the Golgi; mutation is synthetically lethal with <i>apl2 vps1</i> double mutation; member of a protein superfamily with orthologs in diverse organisms                                  |
| YKL056C         | TMA19         | 0.64                                   | -0.27                                                               | Protein that associates with ribosomes; homolog of translationally controlled tumor protein; green fluorescent protein (GFP)-fusion protein localizes to the cytoplasm and relocates to the mitochondrial outer surface upon oxidative stress |
| YCR059C         | YIH1          | 0.63                                   | -0.28                                                               | Protein that inhibits activation of Gcn2p, an eIF2 alpha subunit protein kinase, by competing for Gcn1p binding, thus impacting gene expression in response to starvation; has sequence and functional similarity to the mouse IMPACT gene    |
| YDR388W         | RVS167        | 0.63                                   | -0.84                                                               | Actin-associated protein, interacts with Rvs161p to regulate actin cytoskeleton, endocytosis, and viability following starvation or osmotic stress; homolog of mammalian amphiphysin                                                          |
| YIL153W         | RRD1          | 0.63                                   | -0.38                                                               | Peptidyl-prolyl cis/trans-isomerase, activator of the phosphotyrosyl phosphatase activity of PP2A; involved in G1 phase progression, microtubule dynamics, bud morphogenesis and DNA repair; subunit of the Tap42p-Sit4p-Rrd1p complex        |
| YMR108W         | ILV2          | 0.63                                   | -0.24                                                               | Acetolactate synthase, catalyses the first common step in isoleucine and valine biosynthesis and is the target of several classes of inhibitors, localizes to the mitochondria; expression of the gene is under general amino acid control    |

**Supplemental Table S4: Genes differentially expressed in the *htbK123R* mutant and responsive to subsequent *SIR4* deletion**

| Systematic name | Standard Name | Log2 (Fold change <i>htbK123R/WT</i> ) | Log2 (Fold change <i>htbK123R<math>\Delta</math>sir4/htbK123R</i> ) | Gene Ontology Annotation                                                                                                                                                                                                               |
|-----------------|---------------|----------------------------------------|---------------------------------------------------------------------|----------------------------------------------------------------------------------------------------------------------------------------------------------------------------------------------------------------------------------------|
| YMR236W         | TAF9          | 0.61                                   | -0.41                                                               | Subunit (17 kDa) of TFIID and SAGA complexes, involved in RNA polymerase II transcription initiation and in chromatin modification, similar to histone H3                                                                              |
| YMR182C         | RGM1          | 0.61                                   | -0.57                                                               | Putative transcriptional repressor with proline-rich zinc fingers; overproduction impairs cell growth                                                                                                                                  |
| YJR064W         | CCT5          | 0.61                                   | -0.25                                                               | Subunit of the cytosolic chaperonin Cct ring complex, related to Tcp1p, required for the assembly of actin and tubulins in vivo                                                                                                        |
| YOR197W         | MCA1          | 0.60                                   | -0.31                                                               | Putative cysteine protease similar to mammalian caspases; involved in regulation of apoptosis upon hydrogen peroxide treatment; proposed to be involved in cell cycle progression                                                      |
| YMR070W         | MOT3          | 0.60                                   | -0.48                                                               | Nuclear transcription factor with two Cys2-His2 zinc fingers; involved in repression of a subset of hypoxic genes by Rox1p, repression of several DAN/TIR genes during aerobic growth, and repression of ergosterol biosynthetic genes |
| YOL067C         | RTG1          | 0.60                                   | -0.68                                                               | Transcription factor (bHLH) involved in interorganelle communication between mitochondria, peroxisomes, and nucleus                                                                                                                    |
| YDR025W         | RPS11A        | 0.60                                   | -0.19                                                               | Protein component of the small (40S) ribosomal subunit; identical to Rps11Bp and has similarity to E. coli S17 and rat S11 ribosomal proteins                                                                                          |
| YBL082C         | ALG3          | 0.59                                   | -0.93                                                               | Dolichol-P-Man dependent alpha(1-3) mannosyltransferase, involved in the synthesis of dolichol-linked oligosaccharide donor for N-linked glycosylation of proteins                                                                     |
| YPL079W         | RPL21B        | 0.58                                   | -0.25                                                               | Protein component of the large (60S) ribosomal subunit, nearly identical to Rpl21Ap and has similarity to rat L21 ribosomal protein                                                                                                    |
| YEL021W         | URA3          | 0.58                                   | -0.46                                                               | Orotidine-5'-phosphate (OMP) decarboxylase, catalyzes the sixth enzymatic step in the de novo biosynthesis of pyrimidines, converting OMP into uridine monophosphate (UMP); converts 5-FOA into 5-fluorouracil, a toxic compound       |
| YER023W         | PRO3          | 0.58                                   | -0.71                                                               | Delta 1-pyrroline-5-carboxylate reductase, catalyzes the last step in proline biosynthesis                                                                                                                                             |

**Supplemental Table S4: Genes differentially expressed in the *htbK123R* mutant and responsive to subsequent *SIR4* deletion**

| Systematic name | Standard Name | Log2 (Fold change <i>htbK123R/WT</i> ) | Log2 (Fold change <i>htbK123R<math>\Delta</math>sir4/htbK123R</i> ) | Gene Ontology Annotation                                                                                                                                                                                                                      |
|-----------------|---------------|----------------------------------------|---------------------------------------------------------------------|-----------------------------------------------------------------------------------------------------------------------------------------------------------------------------------------------------------------------------------------------|
| YML010W         | SPT5          | 0.58                                   | -0.74                                                               | Protein involved in regulating Pol I and Pol II transcription and pre-mRNA processing; forms a complex with Spt4p; contains a C-terminal repeat domain that is a target for phosphorylation by Sgv1p                                          |
| YPR093C         | ASR1          | 0.57                                   | -0.43                                                               | Ubiquitin ligase that modifies and regulates RNA Pol II; involved in a putative alcohol-responsive signaling pathway; accumulates in the nucleus under alcohol stress; contains a Ring/PHD finger domain similar to the mammalian rA9 protein |
| YMR246W         | FAA4          | 0.56                                   | -0.51                                                               | Long chain fatty acyl-CoA synthetase, activates imported fatty acids with a preference for C12:0-C16:0 chain lengths; functions in long chain fatty acid import; important for survival during stationary phase; localized to lipid particles |
| YIL018W         | RPL2B         | 0.55                                   | -0.17                                                               | Protein component of the large (60S) ribosomal subunit, identical to Rpl2Ap and has similarity to E. coli L2 and rat L8 ribosomal proteins; expression is upregulated at low temperatures                                                     |
| YPL234C         | TFP3          | 0.55                                   | -0.49                                                               | Vacuolar ATPase V0 domain subunit c', involved in proton transport activity; hydrophobic integral membrane protein (proteolipid) containing four transmembrane segments; N and C termini are in the vacuolar lumen                            |
| YER086W         | ILV1          | 0.54                                   | -0.26                                                               | Threonine deaminase, catalyzes the first step in isoleucine biosynthesis; expression is under general amino acid control; ILV1 locus exhibits highly positioned nucleosomes whose organization is independent of known ILV1 regulation        |
| YNL300W         | TOS6          | 0.54                                   | -0.75                                                               | Glycosylphosphatidylinositol-dependent cell wall protein, expression is periodic and decreases in response to ergosterol perturbation or upon entry into stationary phase; depletion increases resistance to lactic acid                      |
| YNL176C         |               | 0.54                                   | -0.65                                                               | Cell cycle-regulated gene of unknown function, promoter bound by Fkh2p                                                                                                                                                                        |
| YMR043W         | MCM1          | 0.53                                   | -0.41                                                               | Transcription factor involved in cell-type-specific transcription and pheromone response; plays a central role in the formation of both repressor and activator complexes                                                                     |



**Supplemental Table S4: Genes differentially expressed in the *htbK123R* mutant and responsive to subsequent *SIR4* deletion**

| Systematic name | Standard Name | Log2 (Fold change <i>htbK123R/WT</i> ) | Log2 (Fold change <i>htbK123R<math>\Delta</math>sir4/htbK123R</i> ) | Gene Ontology Annotation                                                                                                                                                                                                                 |
|-----------------|---------------|----------------------------------------|---------------------------------------------------------------------|------------------------------------------------------------------------------------------------------------------------------------------------------------------------------------------------------------------------------------------|
| YPL131W         | RPL5          | 0.53                                   | -0.12                                                               | Protein component of the large (60S) ribosomal subunit with similarity to E. coli L18 and rat L5 ribosomal proteins; binds 5S rRNA and is required for 60S subunit assembly                                                              |
| YNR044W         | AGA1          | 0.52                                   | -0.81                                                               | Anchorage subunit of a-agglutinin of a-cells, highly O-glycosylated protein with N-terminal secretion signal and C-terminal signal for addition of GPI anchor to cell wall, linked to adhesion subunit Aga2p via two disulfide bonds     |
| YPR037C         | ERV2          | 0.52                                   | -0.72                                                               | Flavin-linked sulfhydryl oxidase localized to the endoplasmic reticulum lumen, involved in disulfide bond formation within the ER                                                                                                        |
| YGL120C         | PRP43         | 0.52                                   | -0.52                                                               | RNA helicase in the DEAH-box family, functions in both RNA polymerase I and polymerase II transcript metabolism, involved in release of the lariat-intron from the spliceosome                                                           |
| YPL163C         | SVS1          | 0.52                                   | -1.14                                                               | Cell wall and vacuolar protein, required for wild-type resistance to vanadate                                                                                                                                                            |
| YPR145W         | ASN1          | 0.51                                   | -0.31                                                               | Asparagine synthetase, isozyme of Asn2p; catalyzes the synthesis of L-asparagine from L-aspartate in the asparagine biosynthetic pathway                                                                                                 |
| YDR482C         | CWC21         | 0.51                                   | -0.48                                                               | Protein involved in RNA splicing by the spliceosome; component of a complex containing Cef1p; interacts genetically with ISY1 and BUD13; may bind RNA; has similarity to S. pombe Cwf21p                                                 |
| YKL191W         | DPH2          | 0.51                                   | -0.27                                                               | Protein required, along with Dph1p, Kti11p, Jjj3p, and Dph5p, for synthesis of diphthamide, which is a modified histidine residue of translation elongation factor 2 (Eft1p or Eft2p); may act in a complex with Dph1p and Kti11p        |
| YKR042W         | UTH1          | 0.51                                   | -1.22                                                               | Mitochondrial outer membrane and cell wall localized SUN family member involved in cell wall biogenesis and required for mitochondrial autophagy; involved in the oxidative stress response, life span during starvation, and cell death |
| YGR063C         | SPT4          | 0.50                                   | -0.75                                                               | Protein involved in the regulating Pol I and Pol II transcription, pre-mRNA processing, kinetochore function, and gene silencing; forms a complex with Spt5p                                                                             |

**Supplemental Table S4: Genes differentially expressed in the *htbK123R* mutant and responsive to subsequent *SIR4* deletion**

| Systematic name | Standard Name | Log2 (Fold change <i>htbK123R/WT</i> ) | Log2 (Fold change <i>htbK123R<math>\Delta</math>sir4/htbK123R</i> ) | Gene Ontology Annotation                                                                                                                                                                                                                         |
|-----------------|---------------|----------------------------------------|---------------------------------------------------------------------|--------------------------------------------------------------------------------------------------------------------------------------------------------------------------------------------------------------------------------------------------|
| YDR172W         | SUP35         | 0.50                                   | -0.16                                                               | Translation termination factor eRF3; altered protein conformation creates the [PSI(+)] prion, a dominant cytoplasmically inherited protein aggregate that alters translational fidelity and creates a nonsense suppressor phenotype              |
| YCL009C         | ILV6          | 0.50                                   | -0.35                                                               | Regulatory subunit of acetolactate synthase, which catalyzes the first step of branched-chain amino acid biosynthesis; enhances activity of the Ilv2p catalytic subunit, localizes to mitochondria                                               |
| YNL289W         | PCL1          | 0.50                                   | -0.98                                                               | Cyclin, interacts with cyclin-dependent kinase Pho85p; member of the Pcl1,2-like subfamily, involved in the regulation of polarized growth and morphogenesis and progression through the cell cycle; localizes to sites of polarized cell growth |
| YPL055C         | LGE1          | 0.49                                   | -0.72                                                               | Protein of unknown function; null mutant forms abnormally large cells, and homozygous diploid null mutant displays delayed premeiotic DNA synthesis and reduced efficiency of meiotic nuclear division                                           |
| YNL208W         |               | 0.49                                   | -0.64                                                               | Protein of unknown function; may interact with ribosomes, based on co-purification experiments; authentic, non-tagged protein is detected in purified mitochondria in high-throughput studies; potential orthologs found in other fungi          |
| YDR476C         |               | 0.49                                   | -0.69                                                               | Putative protein of unknown function; green fluorescent protein (GFP)-fusion protein localizes to the endoplasmic reticulum; YDR476C is not an essential gene                                                                                    |
| YLR314C         | CDC3          | 0.49                                   | -0.20                                                               | Component of the septin ring of the mother-bud neck that is required for cytokinesis; septins recruit proteins to the neck and can act as a barrier to diffusion at the membrane, and they comprise the 10nm filaments seen with EM              |
| YGR159C         | NSR1          | 0.48                                   | -0.38                                                               | Nucleolar protein that binds nuclear localization sequences, required for pre-rRNA processing and ribosome biogenesis                                                                                                                            |
| YOL007C         | CSI2          | 0.47                                   | -0.50                                                               | Protein of unknown function; green fluorescent protein (GFP)- fusion protein localizes to the mother side of the bud neck and the vacuole; YOL007C is not an essential gene                                                                      |

**Supplemental Table S4: Genes differentially expressed in the *htbK123R* mutant and responsive to subsequent *SIR4* deletion**

| Systematic name | Standard Name | Log2 (Fold change <i>htbK123R/WT</i> ) | Log2 (Fold change <i>htbK123R<math>\Delta</math>sir4/htbK123R</i> ) | Gene Ontology Annotation                                                                                                                                                                                                                      |
|-----------------|---------------|----------------------------------------|---------------------------------------------------------------------|-----------------------------------------------------------------------------------------------------------------------------------------------------------------------------------------------------------------------------------------------|
| YER055C         | HIS1          | 0.47                                   | -0.22                                                               | ATP phosphoribosyltransferase, a hexameric enzyme, catalyzes the first step in histidine biosynthesis; mutations cause histidine auxotrophy and sensitivity to Cu, Co, and Ni salts; transcription is regulated by general amino acid control |
| YDL140C         | RPO21         | 0.47                                   | -0.18                                                               | RNA polymerase II largest subunit B220, part of central core; phosphorylation of C-terminal heptapeptide repeat domain regulates association with transcription and splicing factors; similar to bacterial beta-prime                         |
| YAL019W         | FUN30         | 0.47                                   | -0.28                                                               | Protein whose overexpression affects chromosome stability, potential Cdc28p substrate; homolog of Snf2p; the authentic, non-tagged protein is detected in highly purified mitochondria in high-throughput studies                             |
| YHR058C         | MED6          | 0.47                                   | -0.47                                                               | Subunit of the RNA polymerase II mediator complex; associates with core polymerase subunits to form the RNA polymerase II holoenzyme; essential for transcriptional regulation                                                                |
| YCR084C         | TUP1          | 0.46                                   | -0.57                                                               | General repressor of transcription, forms complex with Cyc8p, involved in the establishment of repressive chromatin structure through interactions with histones H3 and H4, appears to enhance expression of some genes                       |
| YPR035W         | GLN1          | 0.46                                   | -0.19                                                               | Glutamine synthetase (GS), synthesizes glutamine from glutamate and ammonia; with Glt1p, forms the secondary pathway for glutamate biosynthesis from ammonia; expression regulated by nitrogen source and by amino acid limitation            |
| YKR013W         | PRY2          | 0.46                                   | -0.81                                                               | Protein of unknown function                                                                                                                                                                                                                   |
| YLR167W         | RPS31         | 0.45                                   | -0.28                                                               | Fusion protein that is cleaved to yield a ribosomal protein of the small (40S) subunit and ubiquitin; ubiquitin may facilitate assembly of the ribosomal protein into ribosomes; interacts genetically with translation factor eIF2B          |
| YAL014C         | SYN8          | 0.45                                   | -0.64                                                               | Endosomal SNARE related to mammalian syntaxin 8                                                                                                                                                                                               |

**Supplemental Table S4: Genes differentially expressed in the *htbK123R* mutant and responsive to subsequent *SIR4* deletion**

| Systematic name | Standard Name | Log2 (Fold change <i>htbK123R/WT</i> ) | Log2 (Fold change <i>htbK123R<math>\Delta</math>sir4/htbK123R</i> ) | Gene Ontology Annotation                                                                                                                                                                                                                         |
|-----------------|---------------|----------------------------------------|---------------------------------------------------------------------|--------------------------------------------------------------------------------------------------------------------------------------------------------------------------------------------------------------------------------------------------|
| YCL008C         | STP22         | 0.45                                   | -0.51                                                               | Component of the ESCRT-I complex, which is involved in ubiquitin-dependent sorting of proteins into the endosome; homologous to the mouse and human Tsg101 tumor susceptibility gene; mutants exhibit a Class E Vps phenotype                    |
| YOL110W         | SHR5          | 0.44                                   | -1.24                                                               | Subunit of a palmitoyltransferase, composed of Shr5p and Erf2p, that adds a palmitoyl lipid moiety to heterolipidated substrates such as Ras1p and Ras2p through a thioester linkage; palmitoylation is required for Ras2p membrane localization |
| YMR303C         | ADH2          | 0.43                                   | -0.36                                                               | Glucose-repressible alcohol dehydrogenase II, catalyzes the conversion of ethanol to acetaldehyde; involved in the production of certain carboxylate esters; regulated by ADR1                                                                   |
| YDR481C         | PHO8          | 0.43                                   | -0.25                                                               | Repressible alkaline phosphatase, a glycoprotein localized to the vacuole; regulated by levels of inorganic phosphate and by a system consisting of Pho4p, Pho9p, Pho80p, Pho81p and Pho85p; dephosphorylates phosphotyrosyl peptides            |
| YLR390W-A       | CCW14         | 0.43                                   | -0.48                                                               | Covalently linked cell wall glycoprotein, present in the inner layer of the cell wall                                                                                                                                                            |
| YOL109W         | ZEO1          | 0.42                                   | -0.66                                                               | Peripheral membrane protein of the plasma membrane that interacts with Mid2p; regulates the cell integrity pathway mediated by Pkc1p and Sit2p; the authentic protein is detected in a phosphorylated state in highly purified mitochondria      |
| YOR348C         | PUT4          | 0.42                                   | -1.27                                                               | Proline permease, required for high-affinity transport of proline; also transports the toxic proline analog azetidine-2-carboxylate (AzC); PUT4 transcription is repressed in ammonia-grown cells                                                |
| YLR179C         |               | 0.41                                   | -0.50                                                               | Protein of unknown function with similarity to Tfs1p; transcription is activated by paralogous proteins Yrm1p and Yrr1p along with proteins involved in multidrug resistance; GFP-tagged protein localizes to the cytoplasm and nucleus          |
| YGR285C         | ZUO1          | 0.41                                   | -0.16                                                               | Ribosome-associated chaperone, functions in ribosome biogenesis and, in partnership with Ssz1p and Ssb1/2, as a chaperone for nascent polypeptide chains; contains a DnaJ domain and functions as a J-protein partner for Ssb1p and Ssb2p        |

**Supplemental Table S4: Genes differentially expressed in the *htbK123R* mutant and responsive to subsequent *SIR4* deletion**

| Systematic name | Standard Name | Log2 (Fold change <i>htbK123R/WT</i> ) | Log2 (Fold change <i>htbK123R<math>\Delta</math>sir4/htbK123R</i> ) | Gene Ontology Annotation                                                                                                                                                                                                                                                |
|-----------------|---------------|----------------------------------------|---------------------------------------------------------------------|-------------------------------------------------------------------------------------------------------------------------------------------------------------------------------------------------------------------------------------------------------------------------|
| YNL283C         | WSC2          | 0.41                                   | -0.44                                                               | Partially redundant sensor-transducer of the stress-activated PKC1-MPK1 signaling pathway involved in maintenance of cell wall integrity and recovery from heat shock; secretory pathway Wsc2p is required for the arrest of secretion response                         |
| YBR249C         | ARO4          | 0.40                                   | -0.25                                                               | 3-deoxy-D-arabino-heptulosonate-7-phosphate (DAHP) synthase, catalyzes the first step in aromatic amino acid biosynthesis and is feedback-inhibited by tyrosine or high concentrations of phenylalanine or tryptophan                                                   |
| YPL037C         | EGD1          | 0.40                                   | -0.25                                                               | Subunit beta1 of the nascent polypeptide-associated complex (NAC) involved in protein targeting, associated with cytoplasmic ribosomes; enhances DNA binding of the Gal4p activator; homolog of human BTF3b                                                             |
| YDL014W         | NOP1          | 0.40                                   | -0.61                                                               | Nucleolar protein, component of the small subunit processome complex, which is required for processing of pre-18S rRNA; has similarity to mammalian fibrillarin                                                                                                         |
| YDR261C         | EXG2          | 0.38                                   | -0.41                                                               | Exo-1,3-beta-glucanase, involved in cell wall beta-glucan assembly; may be anchored to the plasma membrane via a glycosylphosphatidylinositol (GPI) anchor                                                                                                              |
| YML123C         | PHO84         | 0.37                                   | -0.10                                                               | High-affinity inorganic phosphate (Pi) transporter and low-affinity manganese transporter; regulated by Pho4p and Spt7p; mutation confers resistance to arsenate; exit from the ER during maturation requires Pho86p                                                    |
| YER016W         | BIM1          | 0.37                                   | -0.85                                                               | Microtubule-binding protein that together with Kar9p makes up the cortical microtubule capture site and delays the exit from mitosis when the spindle is oriented abnormally                                                                                            |
| YER019W         | ISC1          | 0.36                                   | -0.62                                                               | Mitochondrial membrane localized inositol phosphosphingolipid phospholipase C, hydrolyzes complex sphingolipids to produce ceramide; activated by phosphatidylserine, cardiolipin, and phosphatidylglycerol; mediates Na <sup>+</sup> and Li <sup>+</sup> halotolerance |
| YDR232W         | HEM1          | 0.36                                   | -0.23                                                               | 5-aminolevulinate synthase, catalyzes the first step in the heme biosynthetic pathway; an N-terminal signal sequence is required for localization to the mitochondrial matrix; expression is regulated by Hap2p-Hap3p                                                   |

**Supplemental Table S4: Genes differentially expressed in the *htbK123R* mutant and responsive to subsequent *SIR4* deletion**

| Systematic name | Standard Name | Log2 (Fold change <i>htbK123R/WT</i> ) | Log2 (Fold change <i>htbK123R<math>\Delta</math>sir4/htbK123R</i> ) | Gene Ontology Annotation                                                                                                                                                                                                                         |
|-----------------|---------------|----------------------------------------|---------------------------------------------------------------------|--------------------------------------------------------------------------------------------------------------------------------------------------------------------------------------------------------------------------------------------------|
| YGL103W         | RPL28         | 0.35                                   | -0.76                                                               | Ribosomal protein of the large (60S) ribosomal subunit, has similarity to E. coli L15 and rat L27a ribosomal proteins; may have peptidyl transferase activity; can mutate to cycloheximide resistance                                            |
| YBL046W         | PSY4          | 0.35                                   | -0.57                                                               | Putative regulatory subunit of an evolutionarily conserved protein phosphatase; localization is cell-cycle dependent and regulated by Cdc28p phosphorylation; required for cisplatin resistance; homolog of mammalian R2                         |
| YKR057W         | RPS21A        | 0.35                                   | -0.31                                                               | Protein component of the small (40S) ribosomal subunit; nearly identical to Rps21Bp and has similarity to rat S21 ribosomal protein                                                                                                              |
| YIL154C         | IMP2'         | 0.35                                   | -0.57                                                               | Transcriptional activator involved in maintenance of ion homeostasis and protection against DNA damage caused by bleomycin and other oxidants, contains a C-terminal leucine-rich repeat                                                         |
| YIL046W         | MET30         | 0.35                                   | -0.32                                                               | F-box protein containing five copies of the WD40 motif, controls cell cycle function, sulfur metabolism, and methionine biosynthesis as part of the ubiquitin ligase complex; interacts with and regulates Met4p, localizes within the nucleus   |
| YOL051W         | GAL11         | 0.34                                   | -0.59                                                               | Subunit of the RNA polymerase II mediator complex; associates with core polymerase subunits to form the RNA polymerase II holoenzyme; affects transcription by acting as target of activators and repressors                                     |
| YEL047C         |               | 0.34                                   | -0.45                                                               | Soluble fumarate reductase, required with isoenzyme Osm1p for anaerobic growth; may interact with ribosomes, based on co-purification experiments; authentic, non-tagged protein is detected in purified mitochondria in high-throughput studies |
| YLR019W         | PSR2          | 0.33                                   | -0.90                                                               | Functionally redundant Psr1p homolog, a plasma membrane phosphatase involved in the general stress response; required with Psr1p and Whi2p for full activation of STRE-mediated gene expression, possibly through dephosphorylation of Msn2p     |

**Supplemental Table S4: Genes differentially expressed in the *htbK123R* mutant and responsive to subsequent *SIR4* deletion**

| Systematic name | Standard Name | Log2 (Fold change <i>htbK123R/WT</i> ) | Log2 (Fold change <i>htbK123R<math>\Delta</math>sir4/htbK123R</i> ) | Gene Ontology Annotation                                                                                                                                                                                                                         |
|-----------------|---------------|----------------------------------------|---------------------------------------------------------------------|--------------------------------------------------------------------------------------------------------------------------------------------------------------------------------------------------------------------------------------------------|
| YKL032C         | IXR1          | 0.33                                   | -0.73                                                               | Protein that binds DNA containing intrastrand cross-links formed by cisplatin, contains two HMG (high mobility group box) domains, which confer the ability to bend cisplatin-modified DNA; mediates aerobic transcriptional repression of COX5b |
| YJR145C         | RPS4A         | 0.33                                   | -0.15                                                               | Protein component of the small (40S) ribosomal subunit; mutation affects 20S pre-rRNA processing; identical to Rps4Bp and has similarity to rat S4 ribosomal protein                                                                             |
| YGR121C         | MEP1          | 0.33                                   | -0.42                                                               | Ammonium permease; belongs to a ubiquitous family of cytoplasmic membrane proteins that transport only ammonium (NH <sub>4</sub> <sup>+</sup> ); expression is under the nitrogen catabolite repression regulation                               |
| YMR276W         | DSK2          | 0.32                                   | -0.55                                                               | Nuclear-enriched ubiquitin-like polyubiquitin-binding protein, required for spindle pole body (SPB) duplication and for transit through the G2/M phase of the cell cycle, involved in proteolysis, interacts with the proteasome                 |
| YOR369C         | RPS12         | 0.32                                   | -0.22                                                               | Protein component of the small (40S) ribosomal subunit; has similarity to rat ribosomal protein S12                                                                                                                                              |
| YKL054C         | DEF1          | 0.32                                   | -0.58                                                               | RNAPII degradation factor, forms a complex with Rad26p in chromatin, enables ubiquitination and proteolysis of RNAPII present in an elongation complex; mutant is deficient in Zip1p loading onto chromosomes during meiosis                     |
| YJR072C         | NPA3          | 0.32                                   | -0.23                                                               | Essential, conserved, cytoplasmic ATPase; phosphorylated by the Pcl1p-Pho85p kinase complex                                                                                                                                                      |
| YKL104C         | GFA1          | 0.31                                   | -0.64                                                               | Glutamine-fructose-6-phosphate amidotransferase, catalyzes the formation of glucosamine-6-P and glutamate from fructose-6-P and glutamine in the first step of chitin biosynthesis                                                               |
| YLR340W         | RPP0          | 0.30                                   | -0.18                                                               | Conserved ribosomal protein P0 of the ribosomal stalk, which is involved in interaction between translational elongation factors and the ribosome; similar to rat P0, human P0, and E. coli L10e; phosphorylated on serine 302                   |

**Supplemental Table S4: Genes differentially expressed in the *htbK123R* mutant and responsive to subsequent *SIR4* deletion**

| Systematic name | Standard Name | Log2 (Fold change <i>htbK123R/WT</i> ) | Log2 (Fold change <i>htbK123R<math>\Delta</math>sir4/htbK123R</i> ) | Gene Ontology Annotation                                                                                                                                                                                                                        |
|-----------------|---------------|----------------------------------------|---------------------------------------------------------------------|-------------------------------------------------------------------------------------------------------------------------------------------------------------------------------------------------------------------------------------------------|
| YNL067W         | RPL9B         | 0.30                                   | -0.17                                                               | Protein component of the large (60S) ribosomal subunit, nearly identical to Rpl9Ap and has similarity to E. coli L6 and rat L9 ribosomal proteins                                                                                               |
| YDR432W         | NPL3          | 0.29                                   | -0.39                                                               | RNA-binding protein that promotes elongation, regulates termination, and carries poly(A) mRNA from nucleus to cytoplasm; required for pre-mRNA splicing; dissociation from mRNAs promoted by Mtr10p; phosphorylated by Sky1p in the cytoplasm   |
| YOL038W         | PRE6          | 0.29                                   | -0.46                                                               | Alpha 4 subunit of the 20S proteasome; may replace alpha 3 subunit (Pre9p) under stress conditions to create a more active proteasomal isoform; GFP-fusion protein relocates from cytosol to the mitochondrial surface upon oxidative stress    |
| YIR006C         | PAN1          | 0.29                                   | -0.69                                                               | Part of actin cytoskeleton-regulatory complex Pan1p-Sla1p-End3p, associates with actin patches on the cell cortex; promotes protein-protein interactions essential for endocytosis; previously thought to be a subunit of poly(A) ribonuclease  |
| YCR052W         | RSC6          | 0.29                                   | -0.50                                                               | Component of the RSC chromatin remodeling complex; essential for mitotic growth; homolog of SWI/SNF subunit Swp73p                                                                                                                              |
| YGR054W         |               | 0.28                                   | -0.25                                                               | Eukaryotic initiation factor (eIF) 2A; associates specifically with both 40S subunits and 80 S ribosomes, and interacts genetically with both eIF5b and eIF4E; homologous to mammalian eIF2A                                                    |
| YGL106W         | MLC1          | 0.28                                   | -0.29                                                               | Essential light chain for Myo1p, light chain for Myo2p; stabilizes Myo2p by binding to the neck region; interacts with Myo1p, Iqg1p, and Myo2p to coordinate formation and contraction of the actomyosin ring with targeted membrane deposition |
| YKL096W-A       | CWP2          | 0.28                                   | -0.10                                                               | Covalently linked cell wall mannoprotein, major constituent of the cell wall; plays a role in stabilizing the cell wall; involved in low pH resistance; precursor is GPI-anchored                                                               |
| YER165W         | PAB1          | 0.28                                   | -0.15                                                               | Poly(A) binding protein, part of the 3'-end RNA-processing complex, mediates interactions between the 5' cap structure and the 3' mRNA poly(A) tail, involved in control of poly(A) tail length, interacts with translation factor eIF-4G       |



**Supplemental Table S4: Genes differentially expressed in the *htbK123R* mutant and responsive to subsequent *SIR4* deletion**

| Systematic name | Standard Name | Log2 (Fold change <i>htbK123R/WT</i> ) | Log2 (Fold change <i>htbK123R<math>\Delta</math>sir4/htbK123R</i> ) | Gene Ontology Annotation                                                                                                                                                                                                                                |
|-----------------|---------------|----------------------------------------|---------------------------------------------------------------------|---------------------------------------------------------------------------------------------------------------------------------------------------------------------------------------------------------------------------------------------------------|
| YHL025W         | SNF6          | 0.27                                   | -0.30                                                               | Subunit of the SWI/SNF chromatin remodeling complex involved in transcriptional regulation; functions interdependently in transcriptional activation with Snf2p and Snf5p                                                                               |
| YBR118W         | TEF2          | 0.26                                   | -0.30                                                               | Translational elongation factor EF-1 alpha; also encoded by TEF1; functions in the binding reaction of aminoacyl-tRNA (AA-tRNA) to ribosomes; may also have a role in tRNA re-export from the nucleus                                                   |
| YML026C         | RPS18B        | 0.26                                   | -0.17                                                               | Protein component of the small (40S) ribosomal subunit; nearly identical to Rps18Ap and has similarity to E. coli S13 and rat S18 ribosomal proteins                                                                                                    |
| YJL130C         | URA2          | 0.26                                   | -0.60                                                               | Bifunctional carbamoylphosphate synthetase (CPSase)-aspartate transcarbamylase (ATCase), catalyzes the first two enzymatic steps in the de novo biosynthesis of pyrimidines; both activities are subject to feedback inhibition by UTP                  |
| YOR204W         | DED1          | 0.25                                   | -0.22                                                               | ATP-dependent DEAD (Asp-Glu-Ala-Asp)-box RNA helicase, required for translation initiation of all yeast mRNAs; mutations in human DEAD-box DBY are a frequent cause of male infertility                                                                 |
| YGR061C         | ADE6          | 0.25                                   | -0.34                                                               | Formylglycinamide-ribonucleotide (FGAM)-synthetase, catalyzes a step in the 'de novo' purine nucleotide biosynthetic pathway                                                                                                                            |
| YDL229W         | SSB1          | 0.25                                   | -0.21                                                               | Cytoplasmic ATPase that is a ribosome-associated molecular chaperone, functions with J-protein partner Zuo1p; may be involved in folding of newly-made polypeptide chains; member of the HSP70 family; interacts with phosphatase subunit Reg1p         |
| YBR127C         | VMA2          | 0.24                                   | -0.22                                                               | Subunit B of the eight-subunit V1 peripheral membrane domain of the vacuolar H <sup>+</sup> -ATPase (V-ATPase), an electrogenic proton pump found throughout the endomembrane system; contains nucleotide binding sites; also detected in the cytoplasm |
| YER043C         | SAH1          | 0.24                                   | -0.72                                                               | S-adenosyl-L-homocysteine hydrolase, catabolizes S-adenosyl-L-homocysteine which is formed after donation of the activated methyl group of S-adenosyl-L-methionine (AdoMet) to an acceptor                                                              |
| YOL030W         | GAS5          | 0.24                                   | -0.31                                                               | 1,3-beta-glucanosyltransferase, has similarity to Gas1p; localizes to the cell wall                                                                                                                                                                     |

**Supplemental Table S4: Genes differentially expressed in the *htbK123R* mutant and responsive to subsequent *SIR4* deletion**

| Systematic name | Standard Name | Log2 (Fold change <i>htbK123R/WT</i> ) | Log2 (Fold change <i>htbK123R<math>\Delta</math>sir4/htbK123R</i> ) | Gene Ontology Annotation                                                                                                                                                                                                                                |
|-----------------|---------------|----------------------------------------|---------------------------------------------------------------------|---------------------------------------------------------------------------------------------------------------------------------------------------------------------------------------------------------------------------------------------------------|
| YAL039C         | CYC3          | 0.24                                   | -0.61                                                               | Cytochrome c heme lyase (holocytochrome c synthase), attaches heme to apo-cytochrome c (Cyc1p or Cyc7p) in the mitochondrial intermembrane space; human ortholog may have a role in microphthalmia with linear skin defects (MLS)                       |
| YLR110C         | CCW12         | 0.24                                   | -0.48                                                               | Cell wall mannoprotein, mutants are defective in mating and agglutination, expression is downregulated by alpha-factor                                                                                                                                  |
| YHL020C         | OPI1          | 0.23                                   | -0.57                                                               | Transcriptional regulator of a variety of genes; phosphorylation by protein kinase A stimulates Opi1p function in negative regulation of phospholipid biosynthetic genes; involved in telomere maintenance                                              |
| YMR008C         | PLB1          | 0.23                                   | -0.29                                                               | Phospholipase B (lysophospholipase) involved in lipid metabolism, required for deacylation of phosphatidylcholine and phosphatidylethanolamine but not phosphatidylinositol                                                                             |
| YGL147C         | RPL9A         | 0.23                                   | -0.24                                                               | Protein component of the large (60S) ribosomal subunit, nearly identical to Rpl9Bp and has similarity to E. coli L6 and rat L9 ribosomal proteins                                                                                                       |
| YBR286W         | APE3          | 0.23                                   | -0.35                                                               | Vacuolar aminopeptidase Y, processed to mature form by Prb1p                                                                                                                                                                                            |
| YGR189C         | CRH1          | 0.22                                   | -0.23                                                               | Chitin transglycosylase that functions in the transfer of chitin to beta(1-6) and beta(1-3) glucans in the cell wall; similar and functionally redundant to Utr2; localizes to sites of polarized growth; expression induced by cell wall stress        |
| YJR073C         | OPI3          | 0.22                                   | -2.41                                                               | Phospholipid methyltransferase (methylene-fatty-acyl-phospholipid synthase), catalyzes the last two steps in phosphatidylcholine biosynthesis                                                                                                           |
| YPR036W         | VMA13         | 0.22                                   | -0.35                                                               | Subunit H of the eight-subunit V1 peripheral membrane domain of the vacuolar H <sup>+</sup> -ATPase (V-ATPase), an electrogenic proton pump found throughout the endomembrane system; serves as an activator or a structural stabilizer of the V-ATPase |
| YFR031C-A       | RPL2A         | 0.21                                   | -0.17                                                               | Protein component of the large (60S) ribosomal subunit, identical to Rpl2Bp and has similarity to E. coli L2 and rat L8 ribosomal proteins                                                                                                              |

**Supplemental Table S4: Genes differentially expressed in the *htbK123R* mutant and responsive to subsequent *SIR4* deletion**

| Systematic name | Standard Name | Log2 (Fold change <i>htbK123R/WT</i> ) | Log2 (Fold change <i>htbK123R<math>\Delta</math>sir4/htbK123R</i> ) | Gene Ontology Annotation                                                                                                                                                                                                                  |
|-----------------|---------------|----------------------------------------|---------------------------------------------------------------------|-------------------------------------------------------------------------------------------------------------------------------------------------------------------------------------------------------------------------------------------|
| YGR162W         | TIF4631       | 0.20                                   | -0.40                                                               | Translation initiation factor eIF4G, subunit of the mRNA cap-binding protein complex (eIF4F) that also contains eIF4E (Cdc33p); interacts with Pab1p and with eIF4A (Tif1p); also has a role in biogenesis of the large ribosomal subunit |
| YDL145C         | COP1          | 0.20                                   | -0.35                                                               | Alpha subunit of COPI vesicle coatomer complex, which surrounds transport vesicles in the early secretory pathway                                                                                                                         |
| YNL055C         | POR1          | 0.20                                   | -0.22                                                               | Mitochondrial porin (voltage-dependent anion channel), outer membrane protein required for the maintenance of mitochondrial osmotic stability and mitochondrial membrane permeability; phosphorylated                                     |
| YHR203C         | RPS4B         | 0.18                                   | -0.19                                                               | Protein component of the small (40S) ribosomal subunit; identical to Rps4Ap and has similarity to rat S4 ribosomal protein                                                                                                                |
| YMR202W         | ERG2          | 0.18                                   | -0.46                                                               | C-8 sterol isomerase, catalyzes the isomerization of the delta-8 double bond to the delta-7 position at an intermediate step in ergosterol biosynthesis                                                                                   |
| YAL042W         | ERV46         | 0.18                                   | -0.49                                                               | Protein localized to COPII-coated vesicles, forms a complex with Erv41p; involved in the membrane fusion stage of transport                                                                                                               |
| YPR181C         | SEC23         | 0.17                                   | -0.35                                                               | GTPase-activating protein, stimulates the GTPase activity of Sar1p; component of the Sec23p-Sec24p heterodimer of the COPII vesicle coat, involved in ER to Golgi transport                                                               |
| YGL030W         | RPL30         | 0.17                                   | -0.11                                                               | Protein component of the large (60S) ribosomal subunit, has similarity to rat L30 ribosomal protein; involved in pre-rRNA processing in the nucleolus; autoregulates splicing of its transcript                                           |
| YIL123W         | SIM1          | 0.16                                   | -0.79                                                               | Protein of the SUN family (Sim1p, Uth1p, Nca3p, Sun4p) that may participate in DNA replication, promoter contains SCB regulation box at -300 bp indicating that expression may be cell cycle-regulated                                    |
| YJR016C         | ILV3          | 0.16                                   | -0.13                                                               | Dihydroxyacid dehydratase, catalyzes third step in the common pathway leading to biosynthesis of branched-chain amino acids                                                                                                               |
| YOR375C         | GDH1          | 0.15                                   | -0.70                                                               | NADP(+)-dependent glutamate dehydrogenase, synthesizes glutamate from ammonia and alpha-ketoglutarate; rate of alpha-ketoglutarate utilization differs from Gdh3p; expression regulated by nitrogen and carbon sources                    |

**Supplemental Table S4: Genes differentially expressed in the *htbK123R* mutant and responsive to subsequent *SIR4* deletion**

| Systematic name | Standard Name | Log2 (Fold change <i>htbK123R/WT</i> ) | Log2 (Fold change <i>htbK123R<math>\Delta</math>sir4/htbK123R</i> ) | Gene Ontology Annotation                                                                                                                                                                                                                  |
|-----------------|---------------|----------------------------------------|---------------------------------------------------------------------|-------------------------------------------------------------------------------------------------------------------------------------------------------------------------------------------------------------------------------------------|
| YLR044C         | PDC1          | 0.14                                   | -0.31                                                               | Major of three pyruvate decarboxylase isozymes, key enzyme in alcoholic fermentation, decarboxylates pyruvate to acetaldehyde; subject to glucose-, ethanol-, and autoregulation; involved in amino acid catabolism                       |
| YLR249W         | YEF3          | 0.12                                   | -0.12                                                               | Gamma subunit of translational elongation factor eEF1B, stimulates the binding of aminoacyl-tRNA (AA-tRNA) to ribosomes by releasing eEF1A (Tef1p/Tef2p) from the ribosomal complex; contains two ABC cassettes; binds and hydrolyzes ATP |
| YJL159W         | HSP150        | 0.11                                   | -0.39                                                               | O-mannosylated heat shock protein that is secreted and covalently attached to the cell wall via beta-1,3-glucan and disulfide bridges; required for cell wall stability; induced by heat shock, oxidative stress, and nitrogen limitation |
| YOL086C         | ADH1          | 0.11                                   | -0.72                                                               | Alcohol dehydrogenase, fermentative isozyme active as homo- or heterotetramers; required for the reduction of acetaldehyde to ethanol, the last step in the glycolytic pathway                                                            |
| YDR077W         | SED1          | 0.11                                   | -0.74                                                               | Major stress-induced structural GPI-cell wall glycoprotein in stationary-phase cells, associates with translating ribosomes, possible role in mitochondrial genome maintenance; ORF contains two distinct variable minisatellites         |
| YOR289W         |               | -1.48                                  | 1.24                                                                | Putative protein of unknown function; transcription induced by the unfolded protein response; green fluorescent protein (GFP)-fusion protein localizes to both the cytoplasm and the nucleus                                              |
| YHR094C         | HXT1          | -1.40                                  | 0.61                                                                | Low-affinity glucose transporter of the major facilitator superfamily, expression is induced by Hxk2p in the presence of glucose and repressed by Rgt1p when glucose is limiting                                                          |
| YDR074W         | TPS2          | -1.39                                  | 0.44                                                                | Phosphatase subunit of the trehalose-6-phosphate synthase/phosphatase complex, which synthesizes the storage carbohydrate trehalose; expression is induced by stress conditions and repressed by the Ras-cAMP pathway                     |
| YIL045W         | PIG2          | -1.32                                  | 1.21                                                                | Putative type-1 protein phosphatase targeting subunit that tethers Glc7p type-1 protein phosphatase to Gsy2p glycogen synthase                                                                                                            |

**Supplemental Table S4: Genes differentially expressed in the *htbK123R* mutant and responsive to subsequent *SIR4* deletion**

| Systematic name | Standard Name | Log2 (Fold change <i>htbK123R/WT</i> ) | Log2 (Fold change <i>htbK123RΔsir4/htbK123R</i> ) | Gene Ontology Annotation                                                                                                                                                                                                                       |
|-----------------|---------------|----------------------------------------|---------------------------------------------------|------------------------------------------------------------------------------------------------------------------------------------------------------------------------------------------------------------------------------------------------|
| YDR058C         | TGL2          | -1.31                                  | 1.59                                              | Triacylglycerol lipase that is localized to the mitochondria; has lipolytic activity towards triacylglycerols and diacylglycerols when expressed in <i>E. coli</i>                                                                             |
| YML100W         | TSL1          | -1.29                                  | 0.79                                              | Large subunit of trehalose 6-phosphate synthase (Tps1p)/phosphatase (Tps2p) complex, which converts uridine-5'-diphosphoglucose and glucose 6-phosphate to trehalose, homologous to Tps3p and may share function                               |
| YOL151W         | GRE2          | -1.20                                  | 0.98                                              | 3-methylbutanal reductase and NADPH-dependent methylglyoxal reductase (D-lactaldehyde dehydrogenase); stress induced (osmotic, ionic, oxidative, heat shock and heavy metals); regulated by the HOG pathway                                    |
| YEL020W-A       | TIM9          | -1.17                                  | 0.65                                              | Essential protein of the mitochondrial intermembrane space, forms a complex with Tim10p (TIM10 complex) that delivers hydrophobic proteins to the TIM22 complex for insertion into the inner membrane                                          |
| YGL104C         | VPS73         | -1.16                                  | 0.96                                              | Mitochondrial protein; mutation affects vacuolar protein sorting; putative transporter; member of the sugar porter family                                                                                                                      |
| YPR036W-A       |               | -1.10                                  | 0.87                                              | Protein of unknown function; transcription is regulated by Pdr1p                                                                                                                                                                               |
| YDR319C         |               | -1.10                                  | 0.73                                              | Putative protein of unknown function, identified as an ortholog of the highly conserved FIT family of proteins involved in triglyceride droplet biosynthesis; interacts with Sst2p and Hsp82p in high-throughput two-hybrid screens            |
| YOR273C         | TPO4          | -1.09                                  | 0.70                                              | Polyamine transport protein, recognizes spermine, putrescine, and spermidine; localizes to the plasma membrane; member of the major facilitator superfamily                                                                                    |
| YOR173W         | DCS2          | -1.08                                  | 1.34                                              | Non-essential, stress induced regulatory protein containing a HIT (histidine triad) motif; modulates m7G-oligoribonucleotide metabolism; inhibits Dcs1p; regulated by Msn2p, Msn4p, and the Ras-cAMP-cAPK signaling pathway, similar to Dcs1p. |
| YDL022W         | GPD1          | -1.05                                  | 0.60                                              | NAD-dependent glycerol-3-phosphate dehydrogenase, key enzyme of glycerol synthesis, essential for growth under osmotic stress; expression regulated by high-osmolarity glycerol response pathway; homolog of Gpd2p                             |

**Supplemental Table S4: Genes differentially expressed in the *htbK123R* mutant and responsive to subsequent *SIR4* deletion**

| Systematic name | Standard Name | Log2 (Fold change <i>htbK123R/WT</i> ) | Log2 (Fold change <i>htbK123R<math>\Delta</math>sir4/htbK123R</i> ) | Gene Ontology Annotation                                                                                                                                                                                                                                  |
|-----------------|---------------|----------------------------------------|---------------------------------------------------------------------|-----------------------------------------------------------------------------------------------------------------------------------------------------------------------------------------------------------------------------------------------------------|
| YBR149W         | ARA1          | -1.05                                  | 0.57                                                                | NADP+ dependent arabinose dehydrogenase, involved in carbohydrate metabolism; purified as homodimer; naturally occurs with a N-terminus degradation product                                                                                               |
| YGL037C         | PNC1          | -1.03                                  | 1.26                                                                | Nicotinamidase that converts nicotinamide to nicotinic acid as part of the NAD(+) salvage pathway, required for life span extension by calorie restriction; PNC1 expression responds to all known stimuli that extend replicative life span               |
| YOR036W         | PEP12         | -1.02                                  | 0.87                                                                | Target membrane receptor (t-SNARE) for vesicular intermediates traveling between the Golgi apparatus and the vacuole; controls entry of biosynthetic, endocytic, and retrograde traffic into the prevacuolar compartment; syntaxin                        |
| YML128C         | MSC1          | -0.99                                  | 0.99                                                                | Protein of unknown function; mutant is defective in directing meiotic recombination events to homologous chromatids; the authentic, non-tagged protein is detected in highly purified mitochondria and is phosphorylated                                  |
| YDL090C         | RAM1          | -0.97                                  | 1.05                                                                | Beta subunit of the CAAX farnesyltransferase (FTase) that prenylates the a-factor mating pheromone and Ras proteins; required for the membrane localization of Ras proteins and a-factor; homolog of the mammalian FTase beta subunit                     |
| YDR332W         | IRC3          | -0.97                                  | 1.40                                                                | Putative RNA helicase of the DEAH/D-box family; null mutant displays increased levels of spontaneous Rad52p foci; green fluorescent protein (GFP)-fusion protein localizes to the mitochondrion                                                           |
| YMR220W         | ERG8          | -0.97                                  | 0.56                                                                | Phosphomevalonate kinase, an essential cytosolic enzyme that acts in the biosynthesis of isoprenoids and sterols, including ergosterol, from mevalonate                                                                                                   |
| YCL040W         | GLK1          | -0.97                                  | 0.95                                                                | Glucokinase, catalyzes the phosphorylation of glucose at C6 in the first irreversible step of glucose metabolism; one of three glucose phosphorylating enzymes; expression regulated by non-fermentable carbon sources                                    |
| YMR251W-A       | HOR7          | -0.96                                  | 0.78                                                                | Protein of unknown function; overexpression suppresses Ca <sup>2+</sup> sensitivity of mutants lacking inositol phosphorylceramide mannosyltransferases Csg1p and Csh1p; transcription is induced under hyperosmotic stress and repressed by alpha factor |

**Supplemental Table S4: Genes differentially expressed in the *htbK123R* mutant and responsive to subsequent *SIR4* deletion**

| Systematic name | Standard Name | Log2 (Fold change <i>htbK123R/WT</i> ) | Log2 (Fold change <i>htbK123R<math>\Delta</math>sir4/<i>htbK123R</i></i> ) | Gene Ontology Annotation                                                                                                                                                                                                                                      |
|-----------------|---------------|----------------------------------------|----------------------------------------------------------------------------|---------------------------------------------------------------------------------------------------------------------------------------------------------------------------------------------------------------------------------------------------------------|
| YNR049C         | MSO1          | -0.95                                  | 0.97                                                                       | Probable component of the secretory vesicle docking complex, acts at a late step in secretion; shows genetic and physical interactions with Sec1p; required for prospore membrane formation during sporulation                                                |
| YLR399C         | BDF1          | -0.91                                  | 0.48                                                                       | Protein involved in transcription initiation at TATA-containing promoters; associates with the basal transcription factor TFIID; contains two bromodomains; corresponds to the C-terminal region of mammalian TAF1; redundant with Bdf2p                      |
| YFL047W         | RGD2          | -0.91                                  | 0.97                                                                       | GTPase-activating protein (RhoGAP) for Cdc42p and Rho5p                                                                                                                                                                                                       |
| YGL005C         | COG7          | -0.91                                  | 0.66                                                                       | Component of the conserved oligomeric Golgi complex (Cog1p through Cog8p), a cytosolic tethering complex that functions in protein trafficking to mediate fusion of transport vesicles to Golgi compartments                                                  |
| YPL004C         | LSP1          | -0.88                                  | 0.61                                                                       | Primary component of eisosomes, which are large immobile patch structures at the cell cortex associated with endocytosis, along with Pil1p and Sur7p; null mutants show activation of Pkc1p/Ypk1p stress resistance pathways                                  |
| YOR349W         | CIN1          | -0.88                                  | 0.73                                                                       | Tubulin folding factor D involved in beta-tubulin (Tub2p) folding; isolated as mutant with increased chromosome loss and sensitivity to benomyl                                                                                                               |
| YAL060W         | BDH1          | -0.88                                  | 0.96                                                                       | NAD-dependent (R,R)-butanediol dehydrogenase, catalyzes oxidation of (R,R)-2,3-butanediol to (3R)-acetoin, oxidation of meso-butanediol to (3S)-acetoin, and reduction of acetoin; enhances use of 2,3-butanediol as an aerobic carbon source                 |
| YLL026W         | HSP104        | -0.88                                  | 0.79                                                                       | Heat shock protein that cooperates with Ydj1p (Hsp40) and Ssa1p (Hsp70) to refold and reactivate previously denatured, aggregated proteins; responsive to stresses including: heat, ethanol, and sodium arsenite; involved in [PSI <sup>+</sup> ] propagation |
| YKL003C         | MRP17         | -0.88                                  | 0.71                                                                       | Mitochondrial ribosomal protein of the small subunit; MRP17 exhibits genetic interactions with PET122, encoding a COX3-specific translational activator                                                                                                       |

**Supplemental Table S4: Genes differentially expressed in the *htbK123R* mutant and responsive to subsequent *SIR4* deletion**

| Systematic name | Standard Name | Log2 (Fold change <i>htbK123R/WT</i> ) | Log2 (Fold change <i>htbK123R<math>\Delta</math>sir4/htbK123R</i> ) | Gene Ontology Annotation                                                                                                                                                                                                                        |
|-----------------|---------------|----------------------------------------|---------------------------------------------------------------------|-------------------------------------------------------------------------------------------------------------------------------------------------------------------------------------------------------------------------------------------------|
| YMR102C         |               | -0.86                                  | 0.30                                                                | Protein of unknown function; transcription is activated by paralogous transcription factors Yrm1p and Yrr1p along with genes involved in multidrug resistance; mutant shows increased resistance to azoles; YMR102C is not an essential gene    |
| YPR109W         |               | -0.86                                  | 0.81                                                                | Predicted membrane protein; diploid deletion strain has high budding index                                                                                                                                                                      |
| YLR168C         | UPS2          | -0.85                                  | 0.72                                                                | Mitochondrial intermembrane space protein involved in regulation of mitochondrial cardiolipin and phosphatidylethanolamine levels; null has defects in mitochondrial morphology; similar to Ups1p, Ups3p and to human PRELI                     |
| YAL005C         | SSA1          | -0.85                                  | 0.28                                                                | ATPase involved in protein folding and nuclear localization signal (NLS)-directed nuclear transport; member of heat shock protein 70 (HSP70) family; forms a chaperone complex with Ydj1p; localized to the nucleus, cytoplasm, and cell wall   |
| YMR105C         | PGM2          | -0.84                                  | 1.16                                                                | Phosphoglucomutase, catalyzes the conversion from glucose-1-phosphate to glucose-6-phosphate, which is a key step in hexose metabolism; functions as the acceptor for a Glc-phosphotransferase                                                  |
| YBR183W         | YPC1          | -0.83                                  | 1.06                                                                | Alkaline ceramidase that also has reverse (CoA-independent) ceramide synthase activity, catalyzes both breakdown and synthesis of phytoceramide; overexpression confers fumonisins B1 resistance                                                |
| YGR010W         | NMA2          | -0.83                                  | 0.86                                                                | Nicotinic acid mononucleotide adenyltransferase, involved in de novo and salvage synthesis of NAD(+)                                                                                                                                            |
| YGR088W         | CTT1          | -0.83                                  | 1.03                                                                | Cytosolic catalase T, has a role in protection from oxidative damage by hydrogen peroxide                                                                                                                                                       |
| YDR438W         | THI74         | -0.83                                  | 0.93                                                                | Mitochondrial transporter repressible by thiamine                                                                                                                                                                                               |
| YPL007C         | TFC8          | -0.82                                  | 0.84                                                                | One of six subunits of RNA polymerase III transcription initiation factor complex (TFIIIC); part of TFIIIC TauB domain that binds BoxB promoter sites of tRNA and other genes; linker between TauB and TauA domains; human homolog is TFIIIC-90 |
| YMR130W         |               | -0.80                                  | 0.68                                                                | Putative protein of unknown function; YMR130W is not an essential gene                                                                                                                                                                          |



**Supplemental Table S4: Genes differentially expressed in the *htbK123R* mutant and responsive to subsequent *SIR4* deletion**

| Systematic name | Standard Name | Log2 (Fold change <i>htbK123R/WT</i> ) | Log2 (Fold change <i>htbK123R<math>\Delta</math>sir4/htbK123R</i> ) | Gene Ontology Annotation                                                                                                                                                                                                                       |
|-----------------|---------------|----------------------------------------|---------------------------------------------------------------------|------------------------------------------------------------------------------------------------------------------------------------------------------------------------------------------------------------------------------------------------|
| YKR017C         |               | -0.79                                  | 0.77                                                                | Putative protein of unknown function; contains a RING finger motif                                                                                                                                                                             |
| YPL087W         | YDC1          | -0.79                                  | 0.86                                                                | Alkaline dihydroceramidase, involved in sphingolipid metabolism; preferentially hydrolyzes dihydroceramide to a free fatty acid and dihydrosphingosine; has a minor reverse activity                                                           |
| YLR345W         |               | -0.77                                  | 0.72                                                                | Similar to 6-phosphofructo-2-kinase/fructose-2,6-bisphosphatase enzymes responsible for the metabolism of fructoso-2,6-bisphosphate; mRNA expression is repressed by the Rfx1p-Tup1p-Ssn6p repressor complex; YLR345W is not an essential gene |
| YBR037C         | SCO1          | -0.77                                  | 0.53                                                                | Copper-binding protein of the mitochondrial inner membrane, required for cytochrome c oxidase activity and respiration; may function to deliver copper to cytochrome c oxidase; has similarity to thioredoxins                                 |
| YPL097W         | MSY1          | -0.75                                  | 0.41                                                                | Mitochondrial tyrosyl-tRNA synthetase                                                                                                                                                                                                          |
| YJR101W         | RSM26         | -0.75                                  | 0.46                                                                | Mitochondrial ribosomal protein of the small subunit                                                                                                                                                                                           |
| YPL026C         | SKS1          | -0.75                                  | 0.80                                                                | Putative serine/threonine protein kinase; involved in the adaptation to low concentrations of glucose independent of the SNF3 regulated pathway                                                                                                |
| YPR176C         | BET2          | -0.74                                  | 1.12                                                                | Beta subunit of Type II geranylgeranyltransferase required for vesicular transport between the endoplasmic reticulum and the Golgi; provides a membrane attachment moiety to Rab-like proteins Ypt1p and Sec4p                                 |
| YDR171W         | HSP42         | -0.74                                  | 1.56                                                                | Small heat shock protein (sHSP) with chaperone activity; forms barrel-shaped oligomers that suppress unfolded protein aggregation; involved in cytoskeleton reorganization after heat shock                                                    |
| YOR347C         | PYK2          | -0.73                                  | 0.57                                                                | Pyruvate kinase that appears to be modulated by phosphorylation; PYK2 transcription is repressed by glucose, and Pyk2p may be active under low glycolytic flux                                                                                 |
| YPR149W         | NCE102        | -0.73                                  | 0.89                                                                | Protein of unknown function; contains transmembrane domains; involved in secretion of proteins that lack classical secretory signal sequences; component of the detergent-insoluble glycolipid-enriched complexes (DIGs)                       |

**Supplemental Table S4: Genes differentially expressed in the *htbK123R* mutant and responsive to subsequent *SIR4* deletion**

| Systematic name | Standard Name | Log2 (Fold change <i>htbK123R/WT</i> ) | Log2 (Fold change <i>htbK123R<math>\Delta</math>sir4/htbK123R</i> ) | Gene Ontology Annotation                                                                                                                                                                                                                         |
|-----------------|---------------|----------------------------------------|---------------------------------------------------------------------|--------------------------------------------------------------------------------------------------------------------------------------------------------------------------------------------------------------------------------------------------|
| YOR049C         | RSB1          | -0.73                                  | 0.76                                                                | Suppressor of sphingoid long chain base (LCB) sensitivity of an LCB-lyase mutation; putative integral membrane transporter or flippase that may transport LCBs from the cytoplasmic side toward the extracytoplasmic side of the membrane        |
| YDL110C         | TMA17         | -0.72                                  | 0.77                                                                | Protein of unknown function that associates with ribosomes; heterozygous deletion demonstrated increases in chromosome instability in a rad9 deletion background; protein abundance is decreased upon intracellular iron depletion               |
| YDR110W         | FOB1          | -0.71                                  | 0.67                                                                | Nucleolar protein that binds the rDNA replication fork barrier (RFB) site; required for replication fork blocking, recombinational hotspot activity, condensin recruitment to RFB and rDNA repeat segregation; related to retroviral integrases  |
| YPL132W         | COX11         | -0.71                                  | 0.66                                                                | Mitochondrial inner membrane protein required for delivery of copper to the Cox1p subunit of cytochrome c oxidase; association with mitochondrial ribosomes suggests that copper delivery may occur during translation of Cox1p                  |
| YBR056W         |               | -0.70                                  | 0.47                                                                | Putative cytoplasmic protein of unknown function                                                                                                                                                                                                 |
| YBR009C         | HHF1          | -0.70                                  | 0.50                                                                | Histone H4, core histone protein required for chromatin assembly and chromosome function; one of two identical histone proteins (see also HHF2); contributes to telomeric silencing; N-terminal domain involved in maintaining genomic integrity |
| YCR023C         |               | -0.70                                  | 0.66                                                                | Vacuolar membrane protein of unknown function; member of the multidrug resistance family; YCR023C is not an essential gene                                                                                                                       |
| YNL274C         | GOR1          | -0.70                                  | 0.94                                                                | Glyoxylate reductase; null mutation results in increased biomass after diauxic shift; the authentic, non-tagged protein is detected in highly purified mitochondria in high-throughput studies                                                   |
| YHR168W         | MTG2          | -0.70                                  | 0.56                                                                | Putative GTPase, member of the Obg family; peripheral protein of the mitochondrial inner membrane that associates with the large ribosomal subunit; required for mitochondrial translation, possibly via a role in ribosome assembly             |

**Supplemental Table S4: Genes differentially expressed in the *htbK123R* mutant and responsive to subsequent *SIR4* deletion**

| Systematic name | Standard Name | Log2 (Fold change <i>htbK123R/WT</i> ) | Log2 (Fold change <i>htbK123R<math>\Delta</math>sir4/<i>htbK123R</i></i> ) | Gene Ontology Annotation                                                                                                                                                                                                         |
|-----------------|---------------|----------------------------------------|----------------------------------------------------------------------------|----------------------------------------------------------------------------------------------------------------------------------------------------------------------------------------------------------------------------------|
| YDL124W         |               | -0.69                                  | 0.68                                                                       | NADPH-dependent alpha-keto amide reductase; reduces aromatic alpha-keto amides, aliphatic alpha-keto esters, and aromatic alpha-keto esters; member of the aldo-keto reductase (AKR) family                                      |
| YKL150W         | MCR1          | -0.69                                  | 0.79                                                                       | Mitochondrial NADH-cytochrome b5 reductase, involved in ergosterol biosynthesis                                                                                                                                                  |
| YGR008C         | STF2          | -0.68                                  | 0.90                                                                       | Protein involved in regulation of the mitochondrial F1F0-ATP synthase; Stf1p and Stf2p may act as stabilizing factors that enhance inhibitory action of the Inh1p protein                                                        |
| YOR230W         | WTM1          | -0.68                                  | 0.71                                                                       | Transcriptional modulator involved in regulation of meiosis, silencing, and expression of RNR genes; required for nuclear localization of the ribonucleotide reductase small subunit Rnr2p and Rnr4p; contains WD repeats        |
| YEL024W         | RIP1          | -0.68                                  | 0.48                                                                       | Ubiquinol-cytochrome-c reductase, a Rieske iron-sulfur protein of the mitochondrial cytochrome bc1 complex; transfers electrons from ubiquinol to cytochrome c1 during respiration                                               |
| YER053C         | PIC2          | -0.68                                  | 0.54                                                                       | Mitochondrial phosphate carrier, imports inorganic phosphate into mitochondria; functionally redundant with Mir1p but less abundant than Mir1p under normal conditions; expression is induced at high temperature                |
| YHR001W         | OSH7          | -0.67                                  | 0.66                                                                       | Member of an oxysterol-binding protein family with seven members in <i>S. cerevisiae</i> ; family members have overlapping, redundant functions in sterol metabolism and collectively perform a function essential for viability |
| YMR090W         |               | -0.66                                  | 0.83                                                                       | Putative protein of unknown function with similarity to DTDP-glucose 4,6-dehydratases; GFP-fusion protein localizes to the cytoplasm; up-regulated in response to the fungicide mancozeb; not essential for viability            |
| YIL093C         | RSM25         | -0.66                                  | 0.37                                                                       | Mitochondrial ribosomal protein of the small subunit                                                                                                                                                                             |
| YFL028C         | CAF16         | -0.65                                  | 0.57                                                                       | Part of evolutionarily-conserved CCR4-NOT regulatory complex; contains single ABC-type ATPase domain but no transmembrane domain; interacts with several subunits of Mediator                                                    |

**Supplemental Table S4: Genes differentially expressed in the *htbK123R* mutant and responsive to subsequent *SIR4* deletion**

| Systematic name | Standard Name | Log2 (Fold change <i>htbK123R/WT</i> ) | Log2 (Fold change <i>htbK123R<math>\Delta</math>sir4/htbK123R</i> ) | Gene Ontology Annotation                                                                                                                                                                                                                        |
|-----------------|---------------|----------------------------------------|---------------------------------------------------------------------|-------------------------------------------------------------------------------------------------------------------------------------------------------------------------------------------------------------------------------------------------|
| YMR250W         | GAD1          | -0.65                                  | 0.81                                                                | Glutamate decarboxylase, converts glutamate into gamma-aminobutyric acid (GABA) during glutamate catabolism; involved in response to oxidative stress                                                                                           |
| YBR151W         | APD1          | -0.65                                  | 0.37                                                                | Protein of unknown function, required for normal localization of actin patches and for normal tolerance of sodium ions and hydrogen peroxide; localizes to both cytoplasm and nucleus                                                           |
| YLL039C         | UBI4          | -0.65                                  | 0.98                                                                | Ubiquitin, becomes conjugated to proteins, marking them for selective degradation via the ubiquitin-26S proteasome system; essential for the cellular stress response; encoded as a polyubiquitin precursor comprised of 5 head-to-tail repeats |
| YOR334W         | MRS2          | -0.64                                  | 0.94                                                                | Mitochondrial inner membrane Mg(2+) channel, required for maintenance of intramitochondrial Mg(2+) concentrations at the correct level to support splicing of group II introns                                                                  |
| YHR216W         | IMD2          | -0.64                                  | 0.89                                                                | Inosine monophosphate dehydrogenase, catalyzes the rate-limiting step in GTP biosynthesis, expression is induced by mycophenolic acid resulting in resistance to the drug, expression is repressed by nutrient limitation                       |
| YDR162C         | NBP2          | -0.63                                  | 0.56                                                                | Protein involved in the HOG (high osmolarity glycerol) pathway, negatively regulates Hog1p by recruitment of phosphatase Ptc1p the Pbs2p-Hog1p complex, found in the nucleus and cytoplasm, contains an SH3 domain that binds Pbs2p             |
| YHR133C         | NSG1          | -0.63                                  | 0.46                                                                | Protein involved in regulation of sterol biosynthesis; specifically stabilizes Hmg2p, one of two HMG-CoA isoenzymes that catalyze the rate-limiting step in sterol biosynthesis; homolog of mammalian INSIG proteins                            |
| YDR358W         | GGA1          | -0.63                                  | 0.82                                                                | Golgi-localized protein with homology to gamma-adaptin, interacts with and regulates Arf1p and Arf2p in a GTP-dependent manner in order to facilitate traffic through the late Golgi                                                            |
| YER124C         | DSE1          | -0.63                                  | 0.71                                                                | Daughter cell-specific protein, may regulate cross-talk between the mating and filamentation pathways; deletion affects cell separation after division and sensitivity to alpha-factor and drugs affecting the cell wall                        |

**Supplemental Table S4: Genes differentially expressed in the *htbK123R* mutant and responsive to subsequent *SIR4* deletion**

| Systematic name | Standard Name | Log2 (Fold change <i>htbK123R/WT</i> ) | Log2 (Fold change <i>htbK123R<math>\Delta</math>sir4/htbK123R</i> ) | Gene Ontology Annotation                                                                                                                                                                                                                       |
|-----------------|---------------|----------------------------------------|---------------------------------------------------------------------|------------------------------------------------------------------------------------------------------------------------------------------------------------------------------------------------------------------------------------------------|
| YEL039C         | CYC7          | -0.62                                  | 2.77                                                                | Cytochrome c isoform 2, expressed under hypoxic conditions; electron carrier of the mitochondrial intermembrane space that transfers electrons from ubiquinone-cytochrome c oxidoreductase to cytochrome c oxidase during cellular respiration |
| YMR058W         | FET3          | -0.62                                  | 0.25                                                                | Ferro-O <sub>2</sub> -oxidoreductase required for high-affinity iron uptake and involved in mediating resistance to copper ion toxicity, belongs to class of integral membrane multicopper oxidases                                            |
| YGL232W         | TAN1          | -0.62                                  | 0.72                                                                | Putative tRNA acetyltransferase, RNA-binding protein required for the formation of the modified nucleoside N(4)-acetylcytidine in serine and leucine tRNAs but not required for the same modification in 18S rRNA                              |
| YGR165W         | MRPS35        | -0.62                                  | 0.52                                                                | Mitochondrial ribosomal protein of the small subunit                                                                                                                                                                                           |
| YPR065W         | ROX1          | -0.62                                  | 0.47                                                                | Heme-dependent repressor of hypoxic genes; contains an HMG domain that is responsible for DNA bending activity                                                                                                                                 |
| YOR298C-A       | MBF1          | -0.61                                  | 0.35                                                                | Transcriptional coactivator that bridges the DNA-binding region of Gcn4p and TATA-binding protein Spt15p; suppressor of frameshift mutations                                                                                                   |
| YPL240C         | HSP82         | -0.61                                  | 0.77                                                                | Hsp90 chaperone required for pheromone signaling and negative regulation of Hsf1p; docks with Tom70p for mitochondrial preprotein delivery; promotes telomerase DNA binding and nucleotide addition; interacts with Cns1p, Cpr6p, Cpr7p, Sti1p |
| YGR247W         | CPD1          | -0.61                                  | 0.63                                                                | Cyclic nucleotide phosphodiesterase, hydrolyzes ADP-ribose 1'', 2''-cyclic phosphate to ADP-ribose 1''-phosphate; may have a role in tRNA splicing; no detectable phenotype is conferred by null mutation or by overexpression                 |
| YGL107C         | RMD9          | -0.61                                  | 0.35                                                                | Mitochondrial protein required for respiratory growth; mutant phenotype and genetic interactions suggest a role in delivering mt mRNAs to ribosomes; located on matrix face of the inner membrane and loosely associated with mitoribosomes    |
| YBR062C         |               | -0.61                                  | 0.54                                                                | Protein of unknown function that interacts with Msb2p; may play a role in activation of the filamentous growth pathway.                                                                                                                        |

**Supplemental Table S4: Genes differentially expressed in the *htbK123R* mutant and responsive to subsequent *SIR4* deletion**

| Systematic name | Standard Name | Log2 (Fold change <i>htbK123R/WT</i> ) | Log2 (Fold change <i>htbK123R<math>\Delta</math>sir4/htbK123R</i> ) | Gene Ontology Annotation                                                                                                                                                                                                                       |
|-----------------|---------------|----------------------------------------|---------------------------------------------------------------------|------------------------------------------------------------------------------------------------------------------------------------------------------------------------------------------------------------------------------------------------|
| YCL018W         | LEU2          | -0.61                                  | 0.58                                                                | Beta-isopropylmalate dehydrogenase (IMDH), catalyzes the third step in the leucine biosynthesis pathway                                                                                                                                        |
| YER062C         | HOR2          | -0.60                                  | 1.63                                                                | One of two redundant DL-glycerol-3-phosphatases (RHR2/GPP1 encodes the other) involved in glycerol biosynthesis; induced in response to hyperosmotic stress and oxidative stress, and during the diauxic transition                            |
| YJL048C         | UBX6          | -0.60                                  | 0.56                                                                | UBX (ubiquitin regulatory X) domain-containing protein that interacts with Cdc48p, transcription is repressed when cells are grown in media containing inositol and choline                                                                    |
| YKL196C         | YKT6          | -0.60                                  | 0.46                                                                | Vesicle membrane protein (v-SNARE) with acyltransferase activity; involved in trafficking to and within the Golgi, endocytic trafficking to the vacuole, and vacuolar fusion; membrane localization due to prenylation at the carboxy-terminus |
| YOL116W         | MSN1          | -0.60                                  | 0.98                                                                | Transcriptional activator involved in regulation of invertase and glucoamylase expression, invasive growth and pseudohyphal differentiation, iron uptake, chromium accumulation, and response to osmotic stress; localizes to the nucleus      |
| YNL306W         | MRPS18        | -0.60                                  | 0.84                                                                | Mitochondrial ribosomal protein of the small subunit; essential for viability, unlike most other mitoribosomal proteins                                                                                                                        |
| YGL143C         | MRF1          | -0.59                                  | 0.61                                                                | Mitochondrial translation release factor, involved in stop codon recognition and hydrolysis of the peptidyl-tRNA bond during mitochondrial translation; lack of MRF1 causes mitochondrial genome instability                                   |
| YML120C         | NDI1          | -0.59                                  | 0.51                                                                | NADH:ubiquinone oxidoreductase, transfers electrons from NADH to ubiquinone in the respiratory chain but does not pump protons, in contrast to the higher eukaryotic multisubunit respiratory complex I; phosphorylated; homolog of human AMID |
| YDL204W         | RTN2          | -0.59                                  | 1.08                                                                | Protein of unknown function; has similarity to mammalian reticulon proteins; member of the RTNLA (reticulon-like A) subfamily                                                                                                                  |
| YJL196C         | ELO1          | -0.58                                  | 0.88                                                                | Elongase I, medium-chain acyl elongase, catalyzes carboxy-terminal elongation of unsaturated C12-C16 fatty acyl-CoAs to C16-C18 fatty acids                                                                                                    |

**Supplemental Table S4: Genes differentially expressed in the *htbK123R* mutant and responsive to subsequent *SIR4* deletion**

| Systematic name | Standard Name | Log2 (Fold change <i>htbK123R/WT</i> ) | Log2 (Fold change <i>htbK123R<math>\Delta</math>sir4/htbK123R</i> ) | Gene Ontology Annotation                                                                                                                                                                                                                         |
|-----------------|---------------|----------------------------------------|---------------------------------------------------------------------|--------------------------------------------------------------------------------------------------------------------------------------------------------------------------------------------------------------------------------------------------|
| YDR050C         | TPI1          | -0.58                                  | 0.14                                                                | Triose phosphate isomerase, abundant glycolytic enzyme; mRNA half-life is regulated by iron availability; transcription is controlled by activators Reb1p, Gcr1p, and Rap1p through binding sites in the 5' non-coding region                    |
| YFR024C-A       | LSB3          | -0.58                                  | 0.38                                                                | Protein containing a C-terminal SH3 domain; binds Las17p, which is a homolog of human Wiskott-Aldrich Syndrome protein involved in actin patch assembly and actin polymerization                                                                 |
| YOR256C         | TRE2          | -0.57                                  | 0.42                                                                | Protein that functions with Tre1p to regulate ubiquitylation and vacuolar degradation of the metal transporter Smf1p; has similarity to transferrin receptors; inviability of null mutant in systematic studies is due to proximity to CDC31     |
| YDL125C         | HNT1          | -0.56                                  | 0.60                                                                | Adenosine 5'-monophosphoramidase; interacts physically and genetically with Kin28p, a CDK and TFIIK subunit, and genetically with CAK1; member of the histidine triad (HIT) superfamily of nucleotide-binding proteins and similar to Hint       |
| YLR109W         | AHP1          | -0.56                                  | 0.47                                                                | Thiol-specific peroxiredoxin, reduces hydroperoxides to protect against oxidative damage; function in vivo requires covalent conjugation to Urm1p                                                                                                |
| YNL030W         | HHF2          | -0.56                                  | 0.52                                                                | Histone H4, core histone protein required for chromatin assembly and chromosome function; one of two identical histone proteins (see also HHF1); contributes to telomeric silencing; N-terminal domain involved in maintaining genomic integrity |
| YIL157C         | COA1          | -0.55                                  | 0.45                                                                | Mitochondrial inner membrane protein required for assembly of the cytochrome c oxidase complex (complex IV); interacts with complex IV assembly factor Shy1p during the early stages of assembly                                                 |
| YML078W         | CPR3          | -0.55                                  | 0.49                                                                | Mitochondrial peptidyl-prolyl cis-trans isomerase (cyclophilin), catalyzes the cis-trans isomerization of peptide bonds N-terminal to proline residues; involved in protein refolding after import into mitochondria                             |
| YLR225C         |               | -0.55                                  | 0.45                                                                | Putative protein of unknown function; green fluorescent protein (GFP)-fusion protein localizes to the cytoplasm; YLR225C is not an essential gene                                                                                                |

**Supplemental Table S4: Genes differentially expressed in the *htbK123R* mutant and responsive to subsequent *SIR4* deletion**

| Systematic name | Standard Name | Log2 (Fold change <i>htbK123R/WT</i> ) | Log2 (Fold change <i>htbK123R<math>\Delta</math>sir4/htbK123R</i> ) | Gene Ontology Annotation                                                                                                                                                                                                                                              |
|-----------------|---------------|----------------------------------------|---------------------------------------------------------------------|-----------------------------------------------------------------------------------------------------------------------------------------------------------------------------------------------------------------------------------------------------------------------|
| YCR005C         | CIT2          | -0.54                                  | 1.43                                                                | Citrate synthase, catalyzes the condensation of acetyl coenzyme A and oxaloacetate to form citrate, peroxisomal isozyme involved in glyoxylate cycle; expression is controlled by Rtg1p and Rtg2p transcription factors                                               |
| YNL111C         | CYB5          | -0.54                                  | 0.61                                                                | Cytochrome b5, involved in the sterol and lipid biosynthesis pathways; acts as an electron donor to support sterol C5-6 desaturation                                                                                                                                  |
| YDR116C         | MRPL1         | -0.54                                  | 0.38                                                                | Mitochondrial ribosomal protein of the large subunit                                                                                                                                                                                                                  |
| YEL011W         | GLC3          | -0.54                                  | 0.94                                                                | Glycogen branching enzyme, involved in glycogen accumulation; green fluorescent protein (GFP)-fusion protein localizes to the cytoplasm in a punctate pattern                                                                                                         |
| YDR047W         | HEM12         | -0.53                                  | 0.36                                                                | Uroporphyrinogen decarboxylase, catalyzes the fifth step in the heme biosynthetic pathway; localizes to both the cytoplasm and nucleus; a hem12 mutant has phenotypes similar to patients with porphyria cutanea tarda                                                |
| YLR312W-A       | MRPL15        | -0.53                                  | 0.65                                                                | Mitochondrial ribosomal protein of the large subunit                                                                                                                                                                                                                  |
| YLR077W         | FMP25         | -0.53                                  | 0.38                                                                | Putative protein of unknown function; the authentic, non-tagged protein is detected in highly purified mitochondria in high-throughput studies                                                                                                                        |
| YBR251W         | MRPS5         | -0.53                                  | 0.63                                                                | Mitochondrial ribosomal protein of the small subunit                                                                                                                                                                                                                  |
| YML127W         | RSC9          | -0.52                                  | 0.78                                                                | Component of the RSC chromatin remodeling complex; DNA-binding protein involved in the synthesis of rRNA and in transcriptional repression and activation of genes regulated by the Target of Rapamycin (TOR) pathway                                                 |
| YHR117W         | TOM71         | -0.52                                  | 0.48                                                                | Mitochondrial outer membrane protein with similarity to Tom70p; probable minor component of the TOM (translocase of outer membrane) complex responsible for recognition and import of mitochondrially directed proteins                                               |
| YML007W         | YAP1          | -0.52                                  | 0.42                                                                | Basic leucine zipper (bZIP) transcription factor required for oxidative stress tolerance; activated by H <sub>2</sub> O <sub>2</sub> through the multistep formation of disulfide bonds and transit from the cytoplasm to the nucleus; mediates resistance to cadmium |



**Supplemental Table S4: Genes differentially expressed in the *htbK123R* mutant and responsive to subsequent *SIR4* deletion**

| Systematic name | Standard Name | Log2 (Fold change <i>htbK123R/WT</i> ) | Log2 (Fold change <i>htbK123R<math>\Delta</math>sir4/<i>htbK123R</i></i> ) | Gene Ontology Annotation                                                                                                                                                                                                                          |
|-----------------|---------------|----------------------------------------|----------------------------------------------------------------------------|---------------------------------------------------------------------------------------------------------------------------------------------------------------------------------------------------------------------------------------------------|
| YHL035C         | VMR1          | -0.52                                  | 0.72                                                                       | Protein of unknown function that may interact with ribosomes, based on co-purification experiments; member of the ATP-binding cassette (ABC) family; potential Cdc28p substrate; detected in purified mitochondria in high-throughput studies     |
| YKL152C         | GPM1          | -0.52                                  | 0.16                                                                       | Tetrameric phosphoglycerate mutase, mediates the conversion of 3-phosphoglycerate to 2-phosphoglycerate during glycolysis and the reverse reaction during gluconeogenesis                                                                         |
| YJL094C         | KHA1          | -0.52                                  | 0.70                                                                       | Putative K <sup>+</sup> /H <sup>+</sup> antiporter with a probable role in intracellular cation homeostasis, localized to Golgi vesicles and detected in highly purified mitochondria in high-throughput studies                                  |
| YGR199W         | PMT6          | -0.51                                  | 0.49                                                                       | Protein O-mannosyltransferase, transfers mannose from dolichyl phosphate-D-mannose to protein serine/threonine residues of secretory proteins; reaction is essential for cell wall rigidity; member of a family of mannosyltransferases           |
| YJR121W         | ATP2          | -0.51                                  | 0.23                                                                       | Beta subunit of the F1 sector of mitochondrial F1F0 ATP synthase, which is a large, evolutionarily conserved enzyme complex required for ATP synthesis; phosphorylated                                                                            |
| YLR163C         | MAS1          | -0.51                                  | 0.66                                                                       | Smaller subunit of the mitochondrial processing protease (MPP), essential processing enzyme that cleaves the N-terminal targeting sequences from mitochondrially imported proteins                                                                |
| YJL051W         | IRC8          | -0.51                                  | 0.57                                                                       | Bud tip localized protein of unknown function; mRNA is targeted to the bud by a She2p dependent transport system; mRNA is cell cycle regulated via Fkh2p, peaking in G2/M phase; null mutant displays increased levels of spontaneous Rad52p foci |
| YDR226W         | ADK1          | -0.51                                  | 0.35                                                                       | Adenylate kinase, required for purine metabolism; localized to the cytoplasm and the mitochondria; lacks cleavable signal sequence                                                                                                                |
| YKL035W         | UGP1          | -0.50                                  | 0.40                                                                       | UDP-glucose pyrophosphorylase (UGPase), catalyses the reversible formation of UDP-Glc from glucose 1-phosphate and UTP, involved in a wide variety of metabolic pathways, expression modulated by Pho85p through Pho4p                            |
| YDL178W         | DLD2          | -0.50                                  | 0.86                                                                       | D-lactate dehydrogenase, located in the mitochondrial matrix                                                                                                                                                                                      |

**Supplemental Table S4: Genes differentially expressed in the *htbK123R* mutant and responsive to subsequent *SIR4* deletion**

| Systematic name | Standard Name | Log2 (Fold change <i>htbK123R/WT</i> ) | Log2 (Fold change <i>htbK123RΔsir4/htbK123R</i> ) | Gene Ontology Annotation                                                                                                                                                                                                                      |
|-----------------|---------------|----------------------------------------|---------------------------------------------------|-----------------------------------------------------------------------------------------------------------------------------------------------------------------------------------------------------------------------------------------------|
| YPL260W         |               | -0.50                                  | 0.38                                              | Putative substrate of cAMP-dependent protein kinase (PKA); green fluorescent protein (GFP)-fusion protein localizes to the cytoplasm and nucleus; YPL260W is not an essential gene                                                            |
| YOL011W         | PLB3          | -0.49                                  | 0.41                                              | Phospholipase B (lysophospholipase) involved in phospholipid metabolism; hydrolyzes phosphatidylinositol and phosphatidylserine and displays transacylase activity in vitro                                                                   |
| YDL020C         | RPN4          | -0.48                                  | 0.68                                              | Transcription factor that stimulates expression of proteasome genes; Rpn4p levels are in turn regulated by the 26S proteasome in a negative feedback control mechanism; RPN4 is transcriptionally regulated by various stress responses       |
| YMR186W         | HSC82         | -0.47                                  | 0.35                                              | Cytoplasmic chaperone of the Hsp90 family, redundant in function and nearly identical with Hsp82p, and together they are essential; expressed constitutively at 10-fold higher basal levels than HSP82 and induced 2-3 fold by heat shock     |
| YNL137C         | NAM9          | -0.47                                  | 0.39                                              | Mitochondrial ribosomal component of the small subunit                                                                                                                                                                                        |
| YLR056W         | ERG3          | -0.47                                  | 0.66                                              | C-5 sterol desaturase, catalyzes the introduction of a C-5(6) double bond into episterol, a precursor in ergosterol biosynthesis; mutants are viable, but cannot grow on non-fermentable carbon sources                                       |
| YPL117C         | IDI1          | -0.47                                  | 0.32                                              | Isopentenyl diphosphate:dimethylallyl diphosphate isomerase (IPP isomerase), catalyzes an essential activation step in the isoprenoid biosynthetic pathway; required for viability                                                            |
| YMR311C         | GLC8          | -0.47                                  | 0.35                                              | Regulatory subunit of protein phosphatase 1 (Glc7p), involved in glycogen metabolism and chromosome segregation; proposed to regulate Glc7p activity via conformational alteration; ortholog of the mammalian protein phosphatase inhibitor 2 |
| YLR177W         |               | -0.47                                  | 0.78                                              | Putative protein of unknown function; phosphorylated by Dbf2p-Mob1p in vitro; some strains contain microsatellite polymorphisms at this locus; YLR177W is not an essential gene                                                               |

**Supplemental Table S4: Genes differentially expressed in the *htbK123R* mutant and responsive to subsequent *SIR4* deletion**

| Systematic name | Standard Name | Log2 (Fold change <i>htbK123R/WT</i> ) | Log2 (Fold change <i>htbK123R<math>\Delta</math>sir4/<i>htbK123R</i></i> ) | Gene Ontology Annotation                                                                                                                                                                                                                                       |
|-----------------|---------------|----------------------------------------|----------------------------------------------------------------------------|----------------------------------------------------------------------------------------------------------------------------------------------------------------------------------------------------------------------------------------------------------------|
| YFL045C         | SEC53         | -0.47                                  | 0.38                                                                       | Phosphomannomutase, involved in synthesis of GDP-mannose and dolichol-phosphate-mannose; required for folding and glycosylation of secretory proteins in the ER lumen                                                                                          |
| YGR234W         | YHB1          | -0.46                                  | 0.26                                                                       | Nitric oxide oxidoreductase, flavohemoglobin involved in nitric oxide detoxification; plays a role in the oxidative and nitrosative stress responses                                                                                                           |
| YMR012W         | CLU1          | -0.46                                  | 0.29                                                                       | eIF3 component of unknown function; deletion causes defects in mitochondrial organization but not in growth or translation initiation, can rescue cytokinesis and mitochondrial organization defects of the <i>Dictyostelium cluA-</i> mutant                  |
| YNL100W         | AIM37         | -0.46                                  | 0.39                                                                       | Putative protein of unknown function; non-tagged protein is detected in purified mitochondria; null mutant is viable and displays reduced respiratory growth and reduced frequency of mitochondrial genome loss                                                |
| YJL054W         | TIM54         | -0.45                                  | 0.45                                                                       | Component of the mitochondrial TIM22 complex involved in insertion of polytopic proteins into the inner membrane                                                                                                                                               |
| YBR126C         | TPS1          | -0.45                                  | 0.33                                                                       | Synthase subunit of trehalose-6-phosphate synthase/phosphatase complex, which synthesizes the storage carbohydrate trehalose; also found in a monomeric form; expression is induced by the stress response and repressed by the Ras-cAMP pathway               |
| YDR516C         | EMI2          | -0.45                                  | 0.67                                                                       | Non-essential protein of unknown function required for transcriptional induction of the early meiotic-specific transcription factor <i>IME1</i> ; required for sporulation; expression is regulated by glucose-repression transcription factors <i>Mig1/2p</i> |
| YNL183C         | NPR1          | -0.45                                  | 0.47                                                                       | Protein kinase that stabilizes several plasma membrane amino acid transporters by antagonizing their ubiquitin-mediated degradation                                                                                                                            |
| YCL064C         | CHA1          | -0.45                                  | 1.24                                                                       | Catabolic L-serine (L-threonine) deaminase, catalyzes the degradation of both L-serine and L-threonine; required to use serine or threonine as the sole nitrogen source, transcriptionally induced by serine and threonine                                     |

**Supplemental Table S4: Genes differentially expressed in the *htbK123R* mutant and responsive to subsequent *SIR4* deletion**

| Systematic name | Standard Name | Log2 (Fold change <i>htbK123R/WT</i> ) | Log2 (Fold change <i>htbK123R<math>\Delta</math>sir4/htbK123R</i> ) | Gene Ontology Annotation                                                                                                                                                                                                                      |
|-----------------|---------------|----------------------------------------|---------------------------------------------------------------------|-----------------------------------------------------------------------------------------------------------------------------------------------------------------------------------------------------------------------------------------------|
| YEL050C         | RML2          | -0.45                                  | 0.29                                                                | Mitochondrial ribosomal protein of the large subunit, has similarity to E. coli L2 ribosomal protein; fat21 mutant allele causes inability to utilize oleate and may interfere with activity of the Adr1p transcription factor                |
| YLR214W         | FRE1          | -0.45                                  | 0.61                                                                | Ferric reductase and cupric reductase, reduces siderophore-bound iron and oxidized copper prior to uptake by transporters; expression induced by low copper and iron levels                                                                   |
| YNL177C         | MRPL22        | -0.45                                  | 0.60                                                                | Mitochondrial ribosomal protein of the large subunit                                                                                                                                                                                          |
| YBL066C         | SEF1          | -0.45                                  | 0.59                                                                | Putative transcription factor, has homolog in <i>Kluyveromyces lactis</i>                                                                                                                                                                     |
| YDR214W         | AHA1          | -0.44                                  | 0.53                                                                | Co-chaperone that binds to Hsp82p and activates its ATPase activity; similar to Hch1p; expression is regulated by stresses such as heat shock                                                                                                 |
| YDR529C         | QCR7          | -0.44                                  | 0.51                                                                | Subunit 7 of the ubiquinol cytochrome-c reductase complex, which is a component of the mitochondrial inner membrane electron transport chain; oriented facing the mitochondrial matrix; N-terminus appears to play a role in complex assembly |
| YOR093C         |               | -0.44                                  | 0.53                                                                | Putative protein of unknown function; deletion causes sensitivity to unfolded protein response-inducing agents                                                                                                                                |
| YNL241C         | ZWF1          | -0.44                                  | 0.40                                                                | Glucose-6-phosphate dehydrogenase (G6PD), catalyzes the first step of the pentose phosphate pathway; involved in adapting to oxidative stress; homolog of the human G6PD which is deficient in patients with hemolytic anemia                 |
| YPL013C         | MRPS16        | -0.44                                  | 0.35                                                                | Mitochondrial ribosomal protein of the small subunit                                                                                                                                                                                          |
| YOR354C         | MSC6          | -0.43                                  | 0.35                                                                | Protein of unknown function; mutant is defective in directing meiotic recombination events to homologous chromatids; the authentic, non-tagged protein is detected in highly purified mitochondria in high-throughput studies                 |
| YGL256W         | ADH4          | -0.43                                  | 0.63                                                                | Alcohol dehydrogenase isoenzyme type IV, dimeric enzyme demonstrated to be zinc-dependent despite sequence similarity to iron-activated alcohol dehydrogenases; transcription is induced in response to zinc deficiency                       |

**Supplemental Table S4: Genes differentially expressed in the *htbK123R* mutant and responsive to subsequent *SIR4* deletion**

| Systematic name | Standard Name | Log2 (Fold change <i>htbK123R/WT</i> ) | Log2 (Fold change <i>htbK123R<math>\Delta</math>sir4/htbK123R</i> ) | Gene Ontology Annotation                                                                                                                                                                                                                      |
|-----------------|---------------|----------------------------------------|---------------------------------------------------------------------|-----------------------------------------------------------------------------------------------------------------------------------------------------------------------------------------------------------------------------------------------|
| YDR175C         | RSM24         | -0.42                                  | 0.66                                                                | Mitochondrial ribosomal protein of the small subunit                                                                                                                                                                                          |
| YDR334W         | SWR1          | -0.42                                  | 0.32                                                                | Swi2/Snf2-related ATPase that is the structural component of the SWR1 complex, which exchanges histone variant H2AZ (Htz1p) for chromatin-bound histone H2A                                                                                   |
| YKL195W         | MIA40         | -0.41                                  | 0.38                                                                | Essential protein of the mitochondrial intermembrane space (IMS); promotes retention of newly imported proteins; may do so by stabilizing client protein folding as part of a disulfide relay system or transferring metal to client proteins |
| YPL075W         | GCR1          | -0.41                                  | 0.50                                                                | Transcriptional activator of genes involved in glycolysis; DNA-binding protein that interacts and functions with the transcriptional activator Gcr2p                                                                                          |
| YDR155C         | CPR1          | -0.41                                  | 0.43                                                                | Cytoplasmic peptidyl-prolyl cis-trans isomerase (cyclophilin), catalyzes the cis-trans isomerization of peptide bonds N-terminal to proline residues; binds the drug cyclosporin A                                                            |
| YDR430C         | CYM1          | -0.41                                  | 0.77                                                                | Lysine-specific metalloprotease of the mitochondrial intermembrane space, member of the pitrilysin family; degrades proteins and presequence peptides cleaved from imported proteins; required for normal mitochondrial morphology            |
| YEL038W         | UTR4          | -0.40                                  | 0.39                                                                | Protein with sequence similarity to 2,3-diketo-5-methylthiopentyl-1-phosphate enolase-phosphatases, involved in methionine salvage; found in both the cytoplasm and nucleus                                                                   |
| YDR224C         | HTB1          | -0.40                                  | 0.35                                                                | Histone H2B, core histone protein required for chromatin assembly and chromosome function; nearly identical to HTB2; Rad6p-Bre1p-Lge1p mediated ubiquitination regulates transcriptional activation, meiotic DSB formation and H3 methylation |
| YPL206C         | PGC1          | -0.40                                  | 0.43                                                                | Phosphatidyl Glycerol phospholipase C; regulates the phosphatidylglycerol (PG) content via a phospholipase C-type degradation mechanism; contains glycerophosphodiester phosphodiesterase motifs                                              |

**Supplemental Table S4: Genes differentially expressed in the *htbK123R* mutant and responsive to subsequent *SIR4* deletion**

| Systematic name | Standard Name | Log2 (Fold change <i>htbK123R/WT</i> ) | Log2 (Fold change <i>htbK123R<math>\Delta</math>sir4/htbK123R</i> ) | Gene Ontology Annotation                                                                                                                                                                                                                       |
|-----------------|---------------|----------------------------------------|---------------------------------------------------------------------|------------------------------------------------------------------------------------------------------------------------------------------------------------------------------------------------------------------------------------------------|
| YBL058W         | SHP1          | -0.40                                  | 0.51                                                                | UBX (ubiquitin regulatory X) domain-containing protein that regulates Glc7p phosphatase activity and interacts with Cdc48p; interacts with ubiquitylated proteins in vivo and is required for degradation of a ubiquitylated model substrate   |
| YIL070C         | MAM33         | -0.40                                  | 0.68                                                                | Acidic protein of the mitochondrial matrix involved in oxidative phosphorylation; related to the human complement receptor gC1q-R                                                                                                              |
| YPL029W         | SUV3          | -0.40                                  | 0.48                                                                | ATP-dependent RNA helicase, component of the mitochondrial degradosome along with the RNase Dss1p; the degradosome associates with the ribosome and mediates RNA turnover; also required during splicing of the COX1 A15_beta intron           |
| YKL053C-A       | MDM35         | -0.40                                  | 0.46                                                                | Mitochondrial intermembrane space protein; mutation affects mitochondrial distribution and morphology; contains twin cysteine-x9-cysteine motifs                                                                                               |
| YER001W         | MNN1          | -0.39                                  | 0.57                                                                | Alpha-1,3-mannosyltransferase, integral membrane glycoprotein of the Golgi complex, required for addition of alpha1,3-mannose linkages to N-linked and O-linked oligosaccharides, one of five <i>S. cerevisiae</i> proteins of the MNN1 family |
| YPR169W         | JIP5          | -0.39                                  | 0.50                                                                | Essential protein required for biogenesis of the large ribosomal subunit; interacts with proteins involved in RNA processing, ribosome biogenesis, ubiquitination and demethylation; similar to WDR55, a human WD repeat protein               |
| YLR069C         | MEF1          | -0.39                                  | 0.40                                                                | Mitochondrial elongation factor involved in translational elongation                                                                                                                                                                           |
| YHL047C         | ARN2          | -0.39                                  | 0.37                                                                | Transporter, member of the ARN family of transporters that specifically recognize siderophore-iron chelates; responsible for uptake of iron bound to the siderophore triacetylfusarinine C                                                     |
| YHL030W         | ECM29         | -0.39                                  | 0.37                                                                | Major component of the proteasome; tethers the proteasome core particle to the regulatory particle, and enhances the stability of the proteasome                                                                                               |
| YLR216C         | CPR6          | -0.38                                  | 0.45                                                                | Peptidyl-prolyl cis-trans isomerase (cyclophilin), catalyzes the cis-trans isomerization of peptide bonds N-terminal to proline residues; binds to Hsp82p and contributes to chaperone activity                                                |

**Supplemental Table S4: Genes differentially expressed in the *htbK123R* mutant and responsive to subsequent *SIR4* deletion**

| Systematic name | Standard Name | Log2 (Fold change <i>htbK123R/WT</i> ) | Log2 (Fold change <i>htbK123R<math>\Delta</math>sir4/htbK123R</i> ) | Gene Ontology Annotation                                                                                                                                                                                                                         |
|-----------------|---------------|----------------------------------------|---------------------------------------------------------------------|--------------------------------------------------------------------------------------------------------------------------------------------------------------------------------------------------------------------------------------------------|
| YMR145C         | NDE1          | -0.38                                  | 0.45                                                                | Mitochondrial external NADH dehydrogenase, a type II NAD(P)H:quinone oxidoreductase that catalyzes the oxidation of cytosolic NADH; Nde1p and Nde2p provide cytosolic NADH to the mitochondrial respiratory chain                                |
| YCR042C         | TAF2          | -0.37                                  | 0.62                                                                | TFIID subunit (150 kDa), involved in RNA polymerase II transcription initiation                                                                                                                                                                  |
| YER172C         | BRR2          | -0.36                                  | 0.48                                                                | RNA-dependent ATPase RNA helicase (DEIH box); required for disruption of U4/U6 base-pairing in native snRNPs to activate the spliceosome for catalysis; homologous to human U5-200kD                                                             |
| YOR136W         | IDH2          | -0.35                                  | 0.82                                                                | Subunit of mitochondrial NAD(+)-dependent isocitrate dehydrogenase, which catalyzes the oxidation of isocitrate to alpha-ketoglutarate in the TCA cycle; phosphorylated                                                                          |
| YKL085W         | MDH1          | -0.34                                  | 0.41                                                                | Mitochondrial malate dehydrogenase, catalyzes interconversion of malate and oxaloacetate; involved in the tricarboxylic acid (TCA) cycle; phosphorylated                                                                                         |
| YFR004W         | RPN11         | -0.34                                  | 0.28                                                                | Metalloprotease subunit of the 19S regulatory particle of the 26S proteasome lid; couples the deubiquitination and degradation of proteasome substrates; involved, independent of catalytic activity, in fission of mitochondria and peroxisomes |
| YKL176C         | LST4          | -0.33                                  | 0.56                                                                | Protein possibly involved in a post-Golgi secretory pathway; required for the transport of nitrogen-regulated amino acid permease Gap1p from the Golgi to the cell surface                                                                       |
| YMR302C         | YME2          | -0.33                                  | 0.59                                                                | Integral inner mitochondrial membrane protein with a role in maintaining mitochondrial nucleoid structure and number; mutants exhibit an increased rate of mitochondrial DNA escape; shows some sequence similarity to exonucleases              |
| YML110C         | COQ5          | -0.32                                  | 0.77                                                                | 2-hexaprenyl-6-methoxy-1,4-benzoquinone methyltransferase, involved in ubiquinone (Coenzyme Q) biosynthesis; localizes to the matrix face of the mitochondrial inner membrane in a large complex with other ubiquinone biosynthetic enzymes      |

**Supplemental Table S4: Genes differentially expressed in the *htbK123R* mutant and responsive to subsequent *SIR4* deletion**

| Systematic name | Standard Name | Log2 (Fold change <i>htbK123R/WT</i> ) | Log2 (Fold change <i>htbK123R<math>\Delta</math>sir4/htbK123R</i> ) | Gene Ontology Annotation                                                                                                                                                                                                                      |
|-----------------|---------------|----------------------------------------|---------------------------------------------------------------------|-----------------------------------------------------------------------------------------------------------------------------------------------------------------------------------------------------------------------------------------------|
| YGR231C         | PHB2          | -0.31                                  | 0.33                                                                | Subunit of the prohibitin complex (Phb1p-Phb2p), a 1.2 MDa ring-shaped inner mitochondrial membrane chaperone that stabilizes newly synthesized proteins; determinant of replicative life span; involved in mitochondrial segregation         |
| YIR035C         |               | -0.31                                  | 0.42                                                                | Putative cytoplasmic protein of unknown function                                                                                                                                                                                              |
| YGR254W         | ENO1          | -0.30                                  | 0.53                                                                | Enolase I, a phosphopyruvate hydratase that catalyzes the conversion of 2-phosphoglycerate to phosphoenolpyruvate during glycolysis and the reverse reaction during gluconeogenesis; expression is repressed in response to glucose           |
| YDR211W         | GCD6          | -0.30                                  | 0.41                                                                | Catalytic epsilon subunit of the translation initiation factor eIF2B, the guanine-nucleotide exchange factor for eIF2; activity subsequently regulated by phosphorylated eIF2; first identified as a negative regulator of GCN4 expression    |
| YMR092C         | AIP1          | -0.29                                  | 0.44                                                                | Actin cortical patch component, interacts with the actin depolymerizing factor cofilin; required to restrict cofilin localization to cortical patches; contains WD repeats                                                                    |
| YGR209C         | TRX2          | -0.29                                  | 0.42                                                                | Cytoplasmic thioredoxin isoenzyme of the thioredoxin system which protects cells against oxidative and reductive stress, forms LMA1 complex with Pbi2p, acts as a cofactor for Tsa1p, required for ER-Golgi transport and vacuole inheritance |
| YJL143W         | TIM17         | -0.28                                  | 0.21                                                                | Essential subunit of the Translocase of the Inner Mitochondrial membrane (TIM23 complex); with Tim23p, contributes to the architecture and function of the import channel; may link the import motor to the core TIM23 complex                |
| YOR167C         | RPS28A        | -0.26                                  | 0.24                                                                | Protein component of the small (40S) ribosomal subunit; nearly identical to Rps28Bp and has similarity to rat S28 ribosomal protein                                                                                                           |
| YLR304C         | ACO1          | -0.26                                  | 0.36                                                                | Aconitase, required for the tricarboxylic acid (TCA) cycle and also independently required for mitochondrial genome maintenance; phosphorylated; component of the mitochondrial nucleoid; mutation leads to glutamate auxotrophy              |
| YHR143W         | DSE2          | -0.25                                  | 0.42                                                                | Daughter cell-specific secreted protein with similarity to glucanases, degrades cell wall from the daughter side causing daughter to separate from mother; expression is repressed by cAMP                                                    |



**Supplemental Table S4: Genes differentially expressed in the *htbK123R* mutant and responsive to subsequent *SIR4* deletion**

| Systematic name | Standard Name | Log2 (Fold change <i>htbK123R/WT</i> ) | Log2 (Fold change <i>htbK123R<math>\Delta</math>sir4/htbK123R</i> ) | Gene Ontology Annotation                                                                                                                                                                                                     |
|-----------------|---------------|----------------------------------------|---------------------------------------------------------------------|------------------------------------------------------------------------------------------------------------------------------------------------------------------------------------------------------------------------------|
| YLR388W         | RPS29A        | -0.25                                  | 0.24                                                                | Protein component of the small (40S) ribosomal subunit; nearly identical to Rps29Bp and has similarity to rat S29 and E. coli S14 ribosomal proteins                                                                         |
| YNL037C         | IDH1          | -0.25                                  | 0.45                                                                | Subunit of mitochondrial NAD(+)-dependent isocitrate dehydrogenase, which catalyzes the oxidation of isocitrate to alpha-ketoglutarate in the TCA cycle                                                                      |
| YHR024C         | MAS2          | -0.23                                  | 0.45                                                                | Larger subunit of the mitochondrial processing protease (MPP), essential processing enzyme that cleaves the N-terminal targeting sequences from mitochondrially imported proteins                                            |
| YPR103W         | PRE2          | -0.23                                  | 0.38                                                                | Beta 5 subunit of the 20S proteasome, responsible for the chymotryptic activity of the proteasome                                                                                                                            |
| YMR089C         | YTA12         | -0.23                                  | 0.25                                                                | Component, with Afg3p, of the mitochondrial inner membrane m-AAA protease that mediates degradation of misfolded or unassembled proteins and is also required for correct assembly of mitochondrial enzyme complexes         |
| YHR007C         | ERG11         | -0.22                                  | 0.22                                                                | Lanosterol 14-alpha-demethylase, catalyzes the C-14 demethylation of lanosterol to form 4,4"-dimethyl cholesta-8,14,24-triene-3-beta-ol in the ergosterol biosynthesis pathway; member of the cytochrome P450 family         |
| YGL012W         | ERG4          | -0.22                                  | 0.32                                                                | C-24(28) sterol reductase, catalyzes the final step in ergosterol biosynthesis; mutants are viable, but lack ergosterol                                                                                                      |
| YIL043C         | CBR1          | -0.22                                  | 0.35                                                                | Microsomal cytochrome b reductase, not essential for viability; also detected in mitochondria; mutation in conserved NADH binding domain of the human ortholog results in type I methemoglobinemia                           |
| YDR345C         | HXT3          | -0.22                                  | 0.47                                                                | Low affinity glucose transporter of the major facilitator superfamily, expression is induced in low or high glucose conditions                                                                                               |
| YDL075W         | RPL31A        | -0.20                                  | 0.25                                                                | Protein component of the large (60S) ribosomal subunit, nearly identical to Rpl31Bp and has similarity to rat L31 ribosomal protein; associates with the karyopherin Sxm1p; loss of both Rpl31p and Rpl39p confers lethality |

**Supplemental Table S4: Genes differentially expressed in the *htbK123R* mutant and responsive to subsequent *SIR4* deletion**

| Systematic name | Standard Name | Log2 (Fold change <i>htbK123R/WT</i> ) | Log2 (Fold change <i>htbK123R<math>\Delta</math>sir4/htbK123R</i> ) | Gene Ontology Annotation                                                                                                                                                                                                                                                 |
|-----------------|---------------|----------------------------------------|---------------------------------------------------------------------|--------------------------------------------------------------------------------------------------------------------------------------------------------------------------------------------------------------------------------------------------------------------------|
| YDR194C         | MSS116        | -0.19                                  | 0.47                                                                | DEAD-box protein required for efficient splicing of mitochondrial Group I and II introns; non-polar RNA helicase that also facilitates strand annealing                                                                                                                  |
| YGR132C         | PHB1          | -0.18                                  | 0.19                                                                | Subunit of the prohibitin complex (Phb1p-Phb2p), a 1.2 MDa ring-shaped inner mitochondrial membrane chaperone that stabilizes newly synthesized proteins; determinant of replicative life span; involved in mitochondrial segregation                                    |
| YKL145W         | RPT1          | -0.18                                  | 0.64                                                                | One of six ATPases of the 19S regulatory particle of the 26S proteasome involved in the degradation of ubiquitinated substrates; required for optimal CDC20 transcription; interacts with Rpn12p and the E3 ubiquitin-protein ligase Ubr1p                               |
| YPL154C         | PEP4          | -0.17                                  | 0.45                                                                | Vacuolar aspartyl protease (proteinase A), required for the posttranslational precursor maturation of vacuolar proteinases; important for protein turnover after oxidative damage; synthesized as a zymogen, self-activates                                              |
| YNL178W         | RPS3          | -0.13                                  | 0.13                                                                | Protein component of the small (40S) ribosomal subunit, has apurinic/aprimidinic (AP) endonuclease activity; essential for viability; has similarity to <i>E. coli</i> S3 and rat S3 ribosomal proteins                                                                  |
| YAL061W         | BDH2          | -1.40                                  | -0.51                                                               | Putative medium-chain alcohol dehydrogenase with similarity to BDH1; transcription induced by constitutively active PDR1 and PDR3                                                                                                                                        |
| YBL047C         | PDR5          | -1.05                                  | -0.07                                                               | Plasma membrane ATP-binding cassette (ABC) transporter, multidrug transporter actively regulated by Pdr1p; also involved in steroid transport, cation resistance, and cellular detoxification during exponential growth                                                  |
| YBR015C         | ECM38         | -0.86                                  | -0.46                                                               | Gamma-glutamyltranspeptidase, major glutathione-degrading enzyme; involved in detoxification of electrophilic xenobiotics; expression induced mainly by nitrogen starvation                                                                                              |
| YBR158W         | ALD6          | -0.83                                  | -1.78                                                               | Cytosolic aldehyde dehydrogenase, activated by Mg <sup>2+</sup> and utilizes NADP <sup>+</sup> as the preferred coenzyme; required for conversion of acetaldehyde to acetate; constitutively expressed; locates to the mitochondrial outer surface upon oxidative stress |

**Supplemental Table S4: Genes differentially expressed in the *htbK123R* mutant and responsive to subsequent *SIR4* deletion**

| Systematic name | Standard Name | Log2 (Fold change <i>htbK123R/WT</i> ) | Log2 (Fold change <i>htbK123R<math>\Delta</math>sir4/htbK123R</i> ) | Gene Ontology Annotation                                                                                                                                                                                                                            |
|-----------------|---------------|----------------------------------------|---------------------------------------------------------------------|-----------------------------------------------------------------------------------------------------------------------------------------------------------------------------------------------------------------------------------------------------|
| YCR012W         | HAT2          | -0.77                                  | -0.76                                                               | Subunit of the Hat1p-Hat2p histone acetyltransferase complex; required for high affinity binding of the complex to free histone H4, thereby enhancing Hat1p activity; similar to human RbAp46 and 48; has a role in telomeric silencing             |
| YCR046C         | GYP8          | -0.76                                  | -0.99                                                               | GTPase-activating protein for yeast Rab family members; Ypt1p is the preferred in vitro substrate but also acts on Sec4p, Ypt31p and Ypt32p; involved in the regulation of ER to Golgi vesicle transport                                            |
| YDL055C         | GPA1          | -0.75                                  | -1.71                                                               | GTP-binding alpha subunit of the heterotrimeric G protein that couples to pheromone receptors; negatively regulates the mating pathway by sequestering G(beta)gamma and by triggering an adaptive response; activates Vps34p at the endosome        |
| YDL128W         | AMN1          | -0.74                                  | -0.40                                                               | Protein required for daughter cell separation, multiple mitotic checkpoints, and chromosome stability; contains 12 degenerate leucine-rich repeat motifs; expression is induced by the Mitotic Exit Network (MEN)                                   |
| YDL174C         | ERG5          | -0.74                                  | -0.33                                                               | C-22 sterol desaturase, a cytochrome P450 enzyme that catalyzes the formation of the C-22 (23) double bond in the sterol side chain in ergosterol biosynthesis; may be a target of azole antifungal drugs                                           |
| YDL195W         | YOR1          | -0.74                                  | -0.44                                                               | Plasma membrane ATP-binding cassette (ABC) transporter, multidrug transporter mediates export of many different organic anions including oligomycin; similar to human cystic fibrosis transmembrane receptor (CFTR)                                 |
| YDR011W         | DLD1          | -0.74                                  | -0.31                                                               | D-lactate dehydrogenase, oxidizes D-lactate to pyruvate, transcription is heme-dependent, repressed by glucose, and derepressed in ethanol or lactate; located in the mitochondrial inner membrane                                                  |
| YDR033W         | VCX1          | -0.69                                  | -0.33                                                               | Vacuolar H <sup>+</sup> /Ca <sup>2+</sup> exchanger involved in control of cytosolic Ca <sup>2+</sup> concentration; has similarity to sodium/calcium exchangers, including the bovine Na <sup>+</sup> /Ca <sup>2+</sup> ,K <sup>+</sup> antiporter |

**Supplemental Table S4: Genes differentially expressed in the *htbK123R* mutant and responsive to subsequent *SIR4* deletion**

| Systematic name | Standard Name | Log2 (Fold change <i>htbK123R/WT</i> ) | Log2 (Fold change <i>htbK123R<math>\Delta</math>sir4/htbK123R</i> ) | Gene Ontology Annotation                                                                                                                                                                                                                      |
|-----------------|---------------|----------------------------------------|---------------------------------------------------------------------|-----------------------------------------------------------------------------------------------------------------------------------------------------------------------------------------------------------------------------------------------|
| YDR170C         | SEC7          | -0.66                                  | -0.33                                                               | Guanine nucleotide exchange factor (GEF) for ADP ribosylation factors involved in proliferation of the Golgi, intra-Golgi transport and ER-to-Golgi transport; found in the cytoplasm and on Golgi-associated coated vesicles                 |
| YDR502C         | CWP1          | -0.62                                  | -0.57                                                               | Cell wall mannoprotein that localizes specifically to birth scars of daughter cells, linked to a beta-1,3- and beta-1,6-glucan heteropolymer through a phosphodiester bond; required for propionic acid resistance                            |
| YDR508C         | CHO1          | -0.61                                  | -0.33                                                               | Phosphatidylserine synthase, functions in phospholipid biosynthesis; catalyzes the reaction CDP-diaclyglycerol + L-serine = CMP + L-1-phosphatidylserine, transcriptionally repressed by myo-inositol and choline                             |
| YEL056W         | HMX1          | -0.58                                  | -0.37                                                               | ER localized heme oxygenase, involved in heme degradation during iron starvation and in the oxidative stress response; expression is regulated by AFT1 and oxidative stress; relocates to the perinuclear region in the presence of oxidants  |
| YEL058W         | FAA1          | -0.56                                  | -0.27                                                               | Long chain fatty acyl-CoA synthetase, activates imported fatty acids with a preference for C12:0-C16:0 chain lengths; functions in long chain fatty acid import; accounts for most acyl-CoA synthetase activity; localized to lipid particles |
| YER026C         | TPO1          | -0.55                                  | -0.36                                                               | Polyamine transporter that recognizes spermine, putrescine, and spermidine; catalyzes uptake of polyamines at alkaline pH and excretion at acidic pH; phosphorylation enhances activity and sorting to the plasma membrane                    |
| YER056C         | ARE2          | -0.54                                  | -0.28                                                               | Acyl-CoA:sterol acyltransferase, isozyme of Are1p; endoplasmic reticulum enzyme that contributes the major sterol esterification activity in the presence of oxygen                                                                           |
| YER070W         | STE2          | -0.53                                  | -3.12                                                               | Receptor for alpha-factor pheromone; seven transmembrane-domain GPCR that interacts with both pheromone and a heterotrimeric G protein to initiate the signaling response that leads to mating between haploid a and alpha cells              |

**Supplemental Table S4: Genes differentially expressed in the *htbK123R* mutant and responsive to subsequent *SIR4* deletion**

| Systematic name | Standard Name | Log2 (Fold change <i>htbK123R/WT</i> ) | Log2 (Fold change <i>htbK123R<math>\Delta</math>sir4/htbK123R</i> ) | Gene Ontology Annotation                                                                                                                                                                                                                        |
|-----------------|---------------|----------------------------------------|---------------------------------------------------------------------|-------------------------------------------------------------------------------------------------------------------------------------------------------------------------------------------------------------------------------------------------|
| YFL026W         | TDH2          | -0.51                                  | -0.12                                                               | Glyceraldehyde-3-phosphate dehydrogenase, isozyme 2, involved in glycolysis and gluconeogenesis; tetramer that catalyzes the reaction of glyceraldehyde-3-phosphate to 1,3 bis-phosphoglycerate; detected in the cytoplasm and cell wall        |
| YFL027C         | PGK1          | -0.50                                  | -0.18                                                               | 3-phosphoglycerate kinase, catalyzes transfer of high-energy phosphoryl groups from the acyl phosphate of 1,3-bisphosphoglycerate to ADP to produce ATP; key enzyme in glycolysis and gluconeogenesis                                           |
| YGL008C         | HXK2          | -0.48                                  | -0.46                                                               | Hexokinase isoenzyme 2 that catalyzes phosphorylation of glucose in the cytosol; predominant hexokinase during growth on glucose; functions in the nucleus to repress expression of HXK1 and GLK1 and to induce expression of its own gene      |
| YGL040C         | STE6          | -0.46                                  | -2.66                                                               | Plasma membrane ATP-binding cassette (ABC) transporter required for the export of a-factor, catalyzes ATP hydrolysis coupled to a-factor transport; contains 12 transmembrane domains and two ATP binding domains; expressed only in MATa cells |
| YGL253W         |               | -0.45                                  | -1.13                                                               | TyB Gag-Pol protein; proteolytically processed to make the Gag, RT, PR, and IN proteins that are required for retrotransposition                                                                                                                |
| YGR130C         | SSA2          | -0.44                                  | -0.33                                                               | ATP binding protein involved in protein folding and vacuolar import of proteins; member of heat shock protein 70 (HSP70) family; associated with the chaperonin-containing T-complex; present in the cytoplasm, vacuolar membrane and cell wall |
| YGR192C         | TAT2          | -0.43                                  | -0.47                                                               | High affinity tryptophan and tyrosine permease, overexpression confers FK506 and FTY720 resistance                                                                                                                                              |
| YGR240C         | ERG27         | -0.43                                  | -0.36                                                               | 3-keto sterol reductase, catalyzes the last of three steps required to remove two C-4 methyl groups from an intermediate in ergosterol biosynthesis; mutants are sterol auxotrophs                                                              |
| YGR281W         | CHS1          | -0.41                                  | -0.53                                                               | Chitin synthase I, requires activation from zymogenic form in order to catalyze the transfer of N-acetylglucosamine (GlcNAc) to chitin; required for repairing the chitin septum during cytokinesis; transcription activated by mating factor   |

**Supplemental Table S4: Genes differentially expressed in the *htbK123R* mutant and responsive to subsequent *SIR4* deletion**

| Systematic name | Standard Name | Log2 (Fold change <i>htbK123R/WT</i> ) | Log2 (Fold change <i>htbK123R<math>\Delta</math>sir4/htbK123R</i> ) | Gene Ontology Annotation                                                                                                                                                                                                                     |
|-----------------|---------------|----------------------------------------|---------------------------------------------------------------------|----------------------------------------------------------------------------------------------------------------------------------------------------------------------------------------------------------------------------------------------|
| YHR005C         |               | -0.39                                  | -0.37                                                               | Putative protein of unknown function; GFP-fusion protein localizes to the cytoplasm; possible component of the eisosome; specifically phosphorylated in vitro by mammalian diphosphoinositol pentakisphosphate (IP7)                         |
| YHR174W         | RHR2          | -0.38                                  | -0.51                                                               | Constitutively expressed isoform of DL-glycerol-3-phosphatase; involved in glycerol biosynthesis, induced in response to both anaerobic and, along with the Hor2p/Gpp2p isoform, osmotic stress                                              |
| YHR179W         | GNP1          | -0.37                                  | -0.28                                                               | High-affinity glutamine permease, also transports Leu, Ser, Thr, Cys, Met and Asn; expression is fully dependent on Grr1p and modulated by the Ssy1p-Ptr3p-Ssy5p (SPS) sensor of extracellular amino acids                                   |
| YIL053W         | FAR1          | -0.36                                  | -1.15                                                               | Cyclin-dependent kinase inhibitor that mediates cell cycle arrest in response to pheromone; also forms a complex with Cdc24p, Ste4p, and Ste18p that may specify the direction of polarized growth during mating; potential Cdc28p substrate |
| YIL169C         | MRH1          | -0.36                                  | -0.29                                                               | Protein that localizes primarily to the plasma membrane, also found at the nuclear envelope; the authentic, non-tagged protein is detected in mitochondria in a phosphorylated state; has similarity to Hsp30p and Yro2p                     |
| YJL063C         | MNN2          | -0.35                                  | -0.29                                                               | Alpha-1,2-mannosyltransferase, responsible for addition of the first alpha-1,2-linked mannose to form the branches on the mannan backbone of oligosaccharides, localizes to an early Golgi compartment                                       |
| YJL157C         | TCB2          | -0.35                                  | -0.50                                                               | Bud-specific protein with a potential role in membrane trafficking; GFP-fusion protein migrates from the cell surface to intracellular vesicles near vacuole; contains 3 calcium and lipid binding domains; mRNA is targeted to the bud      |
| YJR009C         | SAM2          | -0.33                                  | -1.22                                                               | S-adenosylmethionine synthetase, catalyzes transfer of the adenosyl group of ATP to the sulfur atom of methionine; one of two differentially regulated isozymes (Sam1p and Sam2p)                                                            |

**Supplemental Table S4: Genes differentially expressed in the *htbK123R* mutant and responsive to subsequent *SIR4* deletion**

| Systematic name | Standard Name | Log2 (Fold change <i>htbK123R/WT</i> ) | Log2 (Fold change <i>htbK123R<math>\Delta</math>sir4/htbK123R</i> ) | Gene Ontology Annotation                                                                                                                                                                                                                       |
|-----------------|---------------|----------------------------------------|---------------------------------------------------------------------|------------------------------------------------------------------------------------------------------------------------------------------------------------------------------------------------------------------------------------------------|
| YKL096W         | FAS1          | -0.31                                  | -0.39                                                               | Beta subunit of fatty acid synthetase, which catalyzes the synthesis of long-chain saturated fatty acids; contains acetyltransacylase, dehydratase, enoyl reductase, malonyl transacylase, and palmitoyl transacylase activities               |
| YKL182W         | SNQ2          | -0.31                                  | -0.41                                                               | Plasma membrane ATP-binding cassette (ABC) transporter, multidrug transporter involved in multidrug resistance and resistance to singlet oxygen species                                                                                        |
| YKL209C         | HEM2          | -0.30                                  | -0.29                                                               | Aminolevulinatase dehydratase, a homo-octameric enzyme, catalyzes the conversion of 5-aminolevulinatase to porphobilinogen, the second step in heme biosynthesis; enzymatic activity is zinc-dependent; localizes to the cytoplasm and nucleus |
| YKR039W         | MRPL8         | -0.30                                  | -0.32                                                               | Mitochondrial ribosomal protein of the large subunit                                                                                                                                                                                           |
| YLL024C         | ENT2          | -0.29                                  | -0.25                                                               | Epsin-like protein required for endocytosis and actin patch assembly and functionally redundant with Ent1p; contains clathrin-binding motif at C-terminus                                                                                      |
| YLL028W         | PMA1          | -0.29                                  | -0.45                                                               | Plasma membrane H <sup>+</sup> -ATPase, pumps protons out of the cell; major regulator of cytoplasmic pH and plasma membrane potential; part of the P2 subgroup of cation-transporting ATPases                                                 |
| YLR100W         | IMG1          | -0.29                                  | -0.59                                                               | Mitochondrial ribosomal protein of the large subunit, required for respiration and for maintenance of the mitochondrial genome                                                                                                                 |
| YLR150W         | FCY2          | -0.28                                  | -0.19                                                               | Purine-cytosine permease, mediates purine (adenine, guanine, and hypoxanthine) and cytosine accumulation                                                                                                                                       |
| YLR153C         | EXG1          | -0.28                                  | -0.11                                                               | Major exo-1,3-beta-glucanase of the cell wall, involved in cell wall beta-glucan assembly; exists as three differentially glycosylated isoenzymes                                                                                              |
| YLR205C         | RNR1          | -0.28                                  | -0.30                                                               | Major isoform of the large subunit of ribonucleotide-diphosphate reductase; the RNR complex catalyzes rate-limiting step in dNTP synthesis, regulated by DNA replication and DNA damage checkpoint pathways via localization of small subunits |

**Supplemental Table S4: Genes differentially expressed in the *htbK123R* mutant and responsive to subsequent *SIR4* deletion**

| Systematic name | Standard Name | Log2 (Fold change <i>htbK123R/WT</i> ) | Log2 (Fold change <i>htbK123R<math>\Delta</math>sir4/htbK123R</i> ) | Gene Ontology Annotation                                                                                                                                                                                                                                              |
|-----------------|---------------|----------------------------------------|---------------------------------------------------------------------|-----------------------------------------------------------------------------------------------------------------------------------------------------------------------------------------------------------------------------------------------------------------------|
| YLR206W         | ERG10         | -0.28                                  | -0.28                                                               | Acetyl-CoA C-acetyltransferase (acetoacetyl-CoA thiolase), cytosolic enzyme that transfers an acetyl group from one acetyl-CoA molecule to another, forming acetoacetyl-CoA; involved in the first step in mevalonate biosynthesis                                    |
| YLR259C         | ACS2          | -0.26                                  | -0.79                                                               | Acetyl-coA synthetase isoform which, along with Acs1p, is the nuclear source of acetyl-coA for histone acetylation; mutants affect global transcription; required for growth on glucose; expressed under anaerobic conditions                                         |
| YLR299W         | HPF1          | -0.26                                  | -0.33                                                               | Haze-protective mannoprotein that reduces the particle size of aggregated proteins in white wines                                                                                                                                                                     |
| YLR300W         | PSA1          | -0.26                                  | -0.20                                                               | GDP-mannose pyrophosphorylase (mannose-1-phosphate guanyltransferase), synthesizes GDP-mannose from GTP and mannose-1-phosphate in cell wall biosynthesis; required for normal cell wall structure                                                                    |
| YLR355C         | EGT2          | -0.26                                  | -0.17                                                               | Glycosylphosphatidylinositol (GPI)-anchored cell wall endoglucanase required for proper cell separation after cytokinesis, expression is activated by Swi5p and tightly regulated in a cell cycle-dependent manner                                                    |
| YMR015C         | EDE1          | -0.25                                  | -0.44                                                               | Key endocytic protein involved in a network of interactions with other endocytic proteins, binds membranes in a ubiquitin-dependent manner, may also bind ubiquitinated membrane-associated proteins                                                                  |
| YNL054W-B       | MEP3          | -0.25                                  | -0.44                                                               | Ammonium permease of high capacity and low affinity; belongs to a ubiquitous family of cytoplasmic membrane proteins that transport only ammonium (NH <sub>4</sub> <sup>+</sup> ); expression is under the nitrogen catabolite repression regulation ammonia permease |
| YNL087W         | PFK1          | -0.24                                  | -0.28                                                               | Alpha subunit of heterooctameric phosphofructokinase involved in glycolysis, indispensable for anaerobic growth, activated by fructose-2,6-bisphosphate and AMP, mutation inhibits glucose induction of cell cycle-related genes                                      |
| YNL192W         | SEC31         | -0.23                                  | -0.36                                                               | Component of the Sec13p-Sec31p complex of the COPII vesicle coat, required for vesicle formation in ER to Golgi transport                                                                                                                                             |



**Supplemental Table S4: Genes differentially expressed in the *htbK123R* mutant and responsive to subsequent *SIR4* deletion**

| Systematic name | Standard Name | Log2 (Fold change <i>htbK123R/WT</i> ) | Log2 (Fold change <i>htbK123R<math>\Delta</math>sir4/htbK123R</i> ) | Gene Ontology Annotation                                                                                                                                                                                                                      |
|-----------------|---------------|----------------------------------------|---------------------------------------------------------------------|-----------------------------------------------------------------------------------------------------------------------------------------------------------------------------------------------------------------------------------------------|
| YNL327W         | PCM1          | -0.19                                  | -0.25                                                               | Essential N-acetylglucosamine-phosphate mutase; converts GlcNAc-6-P to GlcNAc-1-P, which is a precursor for the biosynthesis of chitin and for the formation of N-glycosylated mannoproteins and glycosylphosphatidylinositol anchors         |
| YNR016C         | FAS2          | -0.19                                  | -0.92                                                               | Alpha subunit of fatty acid synthetase, which catalyzes the synthesis of long-chain saturated fatty acids; contains the acyl-carrier protein domain and beta-ketoacyl reductase, beta-ketoacyl synthase and self-pantetheinylation activities |
| YNR019W         | TDH3          | -0.19                                  | -0.35                                                               | Glyceraldehyde-3-phosphate dehydrogenase, isozyme 3, involved in glycolysis and gluconeogenesis; tetramer that catalyzes the reaction of glyceraldehyde-3-phosphate to 1,3 bis-phosphoglycerate; detected in the cytoplasm and cell wall      |
| YOL020W         | OYE2          | -0.18                                  | -0.50                                                               | Conserved NADPH oxidoreductase containing flavin mononucleotide (FMN), homologous to Oye3p with different ligand binding and catalytic properties; may be involved in sterol metabolism, oxidative stress response, and programmed cell death |
| YOL155C         | HSP60         | -0.17                                  | -0.19                                                               | Tetradecameric mitochondrial chaperonin required for ATP-dependent folding of precursor polypeptides and complex assembly; prevents aggregation and mediates protein refolding after heat shock; role in mtDNA transmission; phosphorylated   |
| YOR153W         | GAP1          | -0.16                                  | -2.28                                                               | General amino acid permease; localization to the plasma membrane is regulated by nitrogen source                                                                                                                                              |
| YOR317W         | ILV5          | -0.13                                  | -0.12                                                               | Acetohydroxyacid reductoisomerase, mitochondrial protein involved in branched-chain amino acid biosynthesis, also required for maintenance of wild-type mitochondrial DNA and found in mitochondrial nucleoids                                |
| YPL028W         | ACC1          | -0.13                                  | -0.31                                                               | Acetyl-CoA carboxylase, biotin containing enzyme that catalyzes the carboxylation of acetyl-CoA to form malonyl-CoA; required for de novo biosynthesis of long-chain fatty acids                                                              |

**Supplemental Table S4: Genes differentially expressed in the *htbK123R* mutant and responsive to subsequent *SIR4* deletion**

| Systematic name | Standard Name | Log2 (Fold change <i>htbK123R/WT</i> ) | Log2 (Fold change <i>htbK123R<math>\Delta</math>sir4/htbK123R</i> ) | Gene Ontology Annotation                                                                                                                                                                                                              |
|-----------------|---------------|----------------------------------------|---------------------------------------------------------------------|---------------------------------------------------------------------------------------------------------------------------------------------------------------------------------------------------------------------------------------|
| YPL061W         | STM1          | -0.13                                  | -0.10                                                               | Protein required for optimal translation under nutrient stress; perturbs association of Yef3p with ribosomes; involved in TOR signaling; binds G4 quadruplex and purine motif triplex nucleic acid; helps maintain telomere structure |
| YPL231W         |               | -0.13                                  | -0.81                                                               | Putative protein of unknown function; serine/threonine rich and highly similar to YOL155C, a putative glucan alpha-1,4-glucosidase; transcript is induced in both high and low pH environments; YIL169C is a non-essential gene       |
| YPR138C         | ENO2          | -0.12                                  | -0.27                                                               | Enolase II, a phosphopyruvate hydratase that catalyzes the conversion of 2-phosphoglycerate to phosphoenolpyruvate during glycolysis and the reverse reaction during gluconeogenesis; expression is induced in response to glucose    |

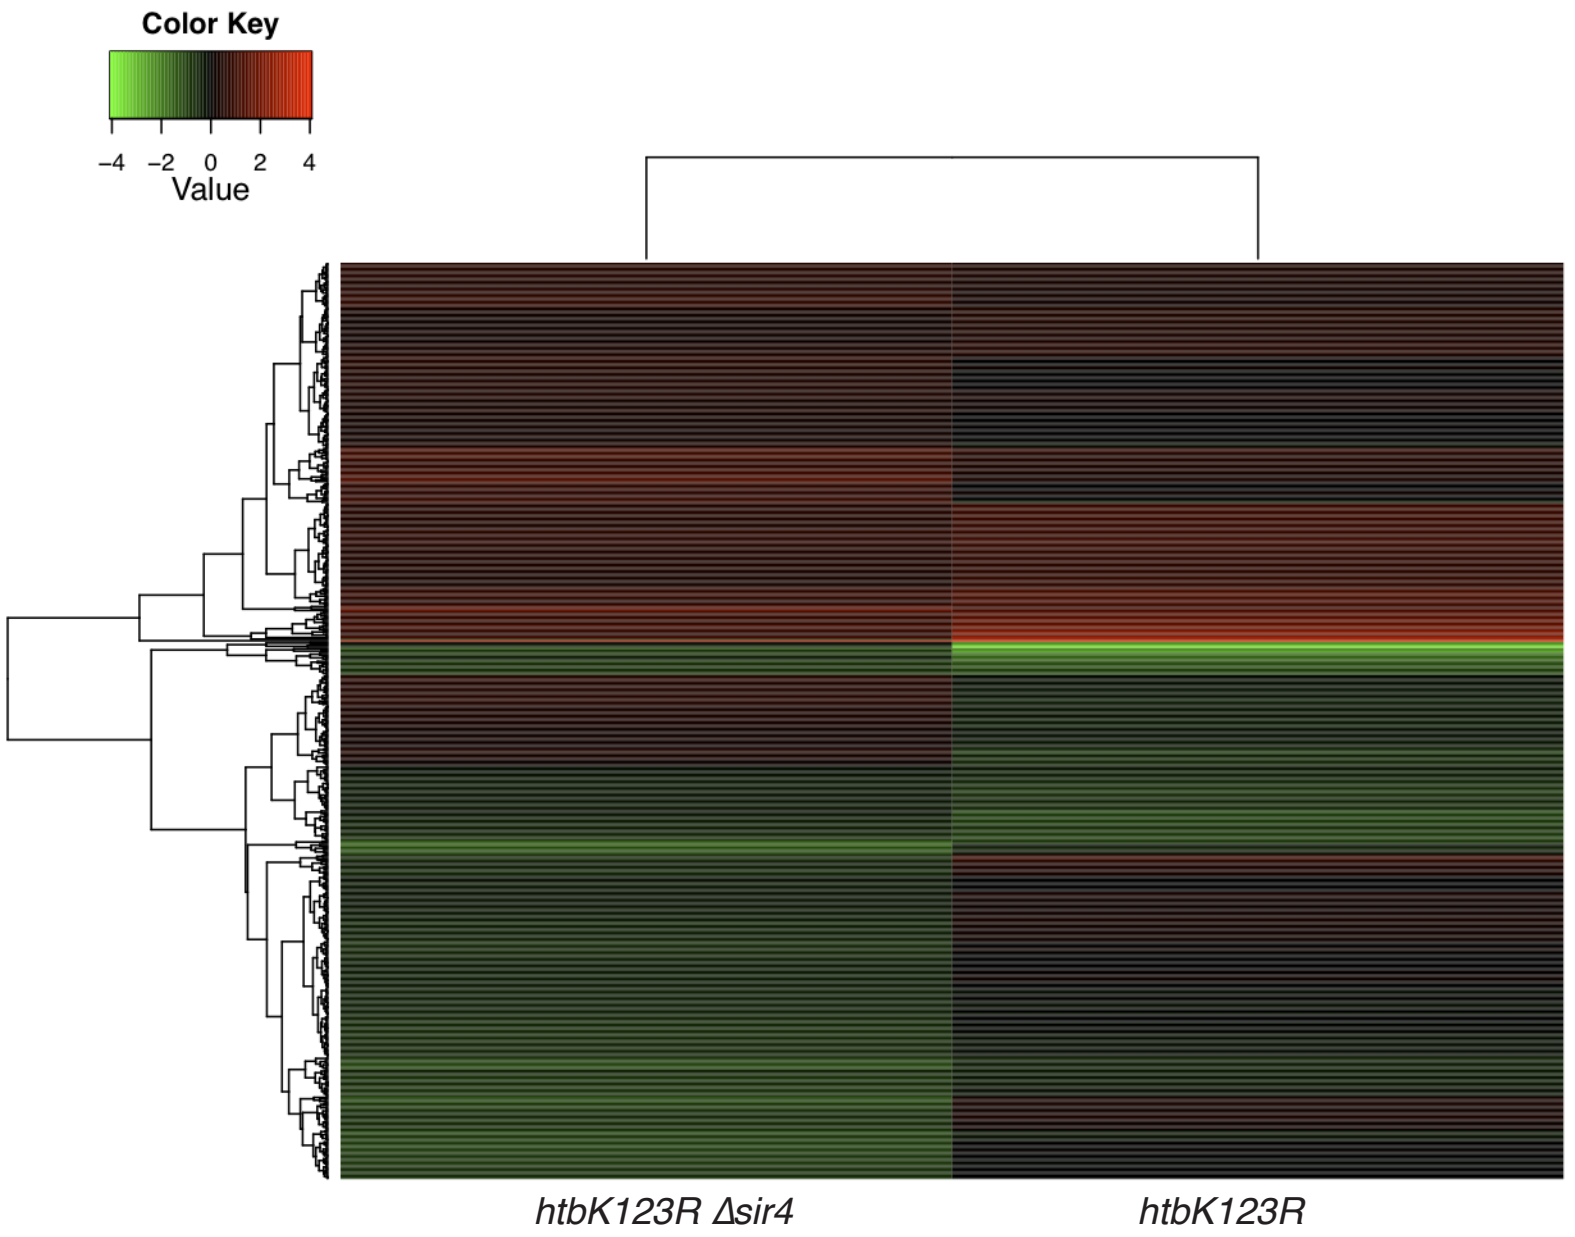

SUPPLEMENTAL FIGURE S1. Heat Map representing the fold changes of the Category 4 genes in *htbK123R* and *htbK123R*  $\Delta$ *sir4* cells relative to congenic WT yeast.
